1 **Barley RIC157 is involved in RACB-mediated susceptibility to**  
2 **powdery mildew**

3 Stefan Engelhardt, Michaela Kopischke, Johanna Hofer, Katja Probst,  
4 Christopher McCollum and Ralph Hückelhoven<sup>#</sup>

5 Phytopathology, TUM School of Life Science Weihenstephan, Technical  
6 University of Munich, Emil-Ramann-Str.2, 85354 Freising, Germany

7 <sup>#</sup>Corresponding author: [hueckelhoven@wzw.tum.de](mailto:hueckelhoven@wzw.tum.de)

8

9 **Abstract**

10 Successful pathogens often benefit from certain cellular host processes. For the  
11 biotrophic ascomycete fungus *Blumeria graminis* f.sp. *hordei* (*Bgh*) it has been shown  
12 that barley RACB, a small monomeric G-protein (ROP, RHO of plants), is required for  
13 full susceptibility to fungal penetration. The susceptibility function of RACB probably  
14 lies in its role in cell polarisation, which may be co-opted by the pathogen for invasive  
15 ingrowth of its haustorium. However, the actual mechanism of how RACB supports the  
16 fungal penetration success is little understood. RIC proteins are considered scaffold  
17 proteins which can interact directly with ROPs via a conserved CRIB motif. Here we  
18 describe a yet uncharacterised RIC protein, RIC157, which can interact directly with  
19 RACB. We could show that RIC157 undergoes a recruitment from the cytoplasm to the  
20 cell periphery in the presence of activated RACB. During fungal infection, RIC157 and  
21 activated RACB colocalise at the penetration site, particularly at the haustorial neck. In  
22 a RACB-dependent manner, transiently overexpressed RIC157 renders barley  
23 epidermal cells more susceptible to fungal penetration. We conclude that RIC157  
24 promotes fungal penetration into barley epidermal cells via its function as downstream  
25 executor in RACB-signaling.

26

27 **Introduction**

28 Plants have developed a multilayer immune system to cope with the constant threat of  
29 microbial invasion, consisting of pre-formed barriers and induced defences based on  
30 the receptor-mediated recognition of microbe-derived and endogenous elicitors (Boller  
31 and Felix 2009; Stukenbrock and McDonald 2009). Except for necrotrophs, invading  
32 microbes rely to different extents on a living host to establish an infection. With the help

33 of secreted effector proteins, pathogens undermine plant immune reactions and  
34 influence the host metabolism to render the cellular environment more favourable  
35 (Białas *et al.* 2018, Han and Kahmann 2019). The co-evolution between microbial  
36 effectors and their specific host target molecules can lead to an increase in host  
37 specialisation, with mutualistic relationships demonstrating extreme examples.  
38 Regarding pathogens, especially in genomes of cereal powdery mildew fungi it has  
39 been observed that the amount of genes encoding for metabolic enzymes is massively  
40 reduced, concomitantly with the proliferation of the putative effector gene pool and  
41 transposable elements (Spanu *et al.* 2010, Wicker *et al.* 2013, Frantzeskakis *et al.*  
42 2018). Plant targets of these effectors are not necessarily involved in resistance  
43 mechanisms, but also in cellular processes that, when controlled by the pathogen, can  
44 become disadvantageous for the host and support the susceptibility towards the  
45 invading pathogen. With the current possibilities to use a plethora of different breeding  
46 technologies, durable crop resistance based on the loss of these susceptibility gene  
47 product functions is within reach (Engelhardt *et al.* 2018).

48 Powdery mildew fungi are notorious pathogens known to infect a wide variety of  
49 monocot and dicot plants causing massive yield losses in crops. The ascomycete  
50 fungus *Blumeria graminis* f.sp. *hordei* (*Bgh*) is the specific causal agent of the  
51 agronomically important powdery mildew disease on barley (*Hordeum vulgare*) in  
52 Europe (Jørgensen and Wolfe 1994). As an obligate biotrophic parasite, *Bgh* requires  
53 living epidermal cells to complete its life cycle (Hückelhoven and Panstruga 2011).  
54 Airborne conidia germinate on the leaf surface and form an appressorium to penetrate  
55 the cuticle and the cell wall with the help of an immense turgor pressure and the release  
56 of cell wall-degrading enzymes (McKeen and Rimmer 1973; Schulze-Lefert and Vogel  
57 2000; Hückelhoven and Panstruga 2011). A successful fungal infection is  
58 characterised by the formation of a haustorium inside the host cell which is essential  
59 for nutrient uptake and effector protein delivery (Hahn and Mendgen 2001, Voegelé *et al.*  
60 2001, Panstruga and Dodds 2009). The haustorium is separated from the host  
61 cytosol by the extrahaustorial matrix and surrounded by the extrahaustorial membrane  
62 (EHM), which is continuous with the plant plasma membrane, but differs functionally and  
63 biochemically from it (Koh *et al.* 2005). It is feasible to imagine a pathogen-triggered  
64 active contribution of the plant to accommodate the fungal haustorium.

65 ROPs (RHO (RAS homologue) of plants, or RACs, for rat sarcoma (RAS)-related C3  
66 botulinum toxin substrate) form a unique subfamily of small monomeric RHO GTPases

67 in plants, since they do not fall into the phylogenetic RHO subclades of RAC, CDC42  
68 and RHO GTPases found in yeast or animals (Brembu *et al.* 2006). G-proteins are  
69 paradigms of molecular switches due to their ability to bind and hydrolyze GTP. The  
70 GTP-bound form represents the activated state, and a plasma membrane association  
71 of ROP-GTP via posttranslational lipid modifications is required for downstream  
72 signalling (Yalovsky 2015). Upon GTP hydrolysis, GDP-bound or nucleotide-free  
73 ROPs are inactive. The cycling between activated and inactive state needs to be  
74 spatiotemporally controlled by regulatory partners. Guanine nucleotide exchange  
75 factors (GEFs) positively regulate ROP activity by facilitating the GDP/GTP exchange.  
76 In plants, three different sorts of ROP GEFs can be distinguished based on their  
77 particular GEF domain: PRONE (plant-specific Rop nucleotide exchanger), DHR2  
78 (DOCK homology region 2, found in SPIKE1) and a less well characterized DH-PH  
79 domain (B-cell lymphoma homology-pleckstrin homology) described in a plant  
80 homolog of human SWAP70 (Berken *et al.* 2005, Meller *et al.* 2005; Gu *et al.* 2006,  
81 Basu *et al.* 2008, Yamaguchi and Kawasaki 2012, Yamaguchi *et al.* 2012, He *et al.*  
82 2018). The interaction of ROPs with a GTPase Activating Protein (GAP) enhances the  
83 intrinsic GTP hydrolysis activity, followed by ROP inactivation (Berken and Wittinghofer  
84 2008). Beside their putative involvement in ROP recycling, Guanine nucleotide  
85 Dissociation Inhibitors (GDIs) bind and sequester inactive ROPs in the cytoplasm and  
86 are therefore considered negative regulators of ROP activity (Klahre *et al.* 2006,  
87 Boulter and Garcia-Mata 2010). ROPs are involved in the regulation of a multitude of  
88 cellular processes. For instance, the cytoskeleton organisation and consequentially  
89 cell shape and function is subject to RHO-like GTPase control (Chen and Friml 2014).  
90 In *Arabidopsis thaliana* xylem vessels, AtROP11 signaling promotes cell wall  
91 apposition and shapes cell wall pit boundaries (Sugiyama *et al.* 2019). Different ROPs  
92 are involved in polar cell growth and even function antagonistically during the  
93 generation of *Arabidopsis thaliana* pavement cells (Craddock *et al.* 2012). Beside cell  
94 polarisation and cytoskeleton organisation, ROPs have been also implicated in  
95 membrane trafficking and auxin signaling (Yalovsky *et al.* 2008, Wu *et al.* 2011).  
96 OsRac1 from rice (*Oryza sativa*), a great example for demonstrating the versatility of  
97 ROPs, enhances cell division by regulating OsMAPK6, thereby promoting rice grain  
98 yield (Zhang *et al.* 2019). It has also been shown to regulate immune-related processes  
99 like ROS production, defense gene expression and cell death. OsRac1 becomes  
100 activated by OsRacGEF1 upon receptor-mediated perception of fungal-derived chitin

101 by OsCEBiP and OsCERK1 (Akamatsu *et al.* 2013). Chitin-perception might also lead  
102 to the activation of OsRAC1 by OsSWAP70 (Yamaguchi *et al.* 2012). Downstream  
103 signaling by OsRAC1 is also triggered after recognition of pathogen effector proteins:  
104 Plasma membrane-localised Pit, a nucleotide binding-leucine rich repeat resistance  
105 (NLR) protein for the rice blast fungus *Magnaporthe oryzae*, associates with DOCK  
106 family GEF OsSPK1, thereby likely activating OsRac1 (Kawano *et al.* 2010, Kawano  
107 *et al.* 2014, Wang *et al.* 2018). A recent report regarding an involvement in defence  
108 reactions against rice blast mediated by the NLR protein PID3 (Zhou *et al.* 2019) opens  
109 up the possibility of OsRac1 being a downstream hub of other rice NLR proteins.  
110 In the barley-powdery mildew interaction, several barley proteins involved in ROP  
111 signaling or ROP activity regulation have been shown to influence fungal penetration  
112 success. The barley ROP RACB has been shown to act as susceptibility factor  
113 (Schultheiss *et al.* 2002, Schultheiss *et al.* 2003, Hoefle *et al.* 2011). In the absence of  
114 the pathogen, RACB appears to be involved in cell polarization processes, as stable  
115 RACB silencing affects stomatal subsidiary cell and root hair development (Scheler *et*  
116 *al.* 2016). The expression of a constitutively activated GTP-bound RACB increased  
117 fungal penetration efficiency into barley epidermal cells, whereas silencing RACB by  
118 RNA interference (RNAi) renders epidermal cells less susceptible against fungal  
119 invasion. Two RACB-interacting proteins have been described as negative regulators  
120 of RACB function in susceptibility. First, the Microtubule-Associated ROP-GAP1  
121 (MAGAP1) is recruited to the cell periphery by activated RACB, where it limits  
122 susceptibility to powdery mildew likely by enhancing the GTP-hydrolyzing activity of  
123 RACB (Hoefle *et al.* 2011). Second, activated RACB recruits the cytoplasmic ROP  
124 binding kinase1 (RBK1) to the cell periphery and enhances its kinase activity *in vitro*  
125 (Huesmann *et al.* 2012). Transient silencing of RBK1 or RBK1-interacting protein SKP1  
126 (type II S-phase kinase1-associated protein) suggested that RBK1 acts in negative  
127 regulation of RACB protein stability and hence in disease resistance (Reiner *et al.*  
128 2016). Additionally, RBK1 also appears to be involved in cytoskeleton regulation by  
129 positively controlling microtubule stability.

130 In order to regulate cellular processes, ROPs need to activate or deactivate  
131 downstream executors (also called ROP effectors). The interaction with some of these  
132 executors is often indirect and achieved via scaffold proteins bridging the activated  
133 ROPs to their signal destination targets. Two different classes of scaffold proteins have  
134 been described so far, ICR/RIPs and RICs. ICR/RIPs (Interactor of Constitutive Active

135 ROP/ROP Interactive Partners) have been shown as ROP interactors to be required  
136 for cell polarity, vesicle trafficking and polar auxin transport (Lavy *et al.* 2007, Hazak *et*  
137 *al.* 2014). In barley, RIPb interacts directly with RACB and enhances disease  
138 susceptibility towards powdery mildew (McCollum *et al.* 2019 Preprint). RIC (ROP-  
139 Interactive and CRIB-domain containing) proteins, another class of scaffold proteins in  
140 ROP signaling, share a highly conserved CRIB motif (Cdc42/Rac Interactive Binding  
141 motif, Burbelo *et al.* 1995), which is essential for the direct interaction with ROPs. The  
142 CRIB domain is also present in a subset of ROP GAPs such as barley MAGAP1  
143 (Schaefer *et al.* 2011). In barley, the knowledge about RIC protein function is quite  
144 limited. RIC171, however, has been shown to not only interact directly with RACB, but  
145 also to increase fungal penetration efficiency in barley epidermal cells upon  
146 overexpression. Activated RACB recruits RIC171 to the cell periphery and, in the  
147 presence of *Bgh*, RIC171 accumulated at the haustorial neck close to the penetration  
148 site (Schultheiss *et al.* 2008). In *Arabidopsis thaliana* (At), 11 different RIC proteins  
149 have been identified, that do not share any clear sequence homology outside their  
150 CRIB domain (Wu *et al.* 2001). By directly interacting with AtROPs, AtRIC proteins are  
151 involved in numerous cellular processes. During salt stress, AtROP2 regulates  
152 microtubule organisation in an AtRIC1-dependent manner (Li *et al.* 2017). AtRIC1 also  
153 interacts with AtROP6 in pavement cells to enhance the ordering of cortical  
154 microtubules upon hormonal signals (Fu *et al.* 2009) and is involved in cell elongation  
155 during pavement cell morphogenesis (Higaki *et al.* 2017). AtRICs counteract each  
156 other to a certain extent as well, as seen with AtROP1-interacting AtRIC3 and AtRIC4  
157 during pollen tube growth. AtRIC3 regulates calcium influx and triggers actin  
158 depolymerisation, whereas AtRIC4 enhances actin polymerisation (Gu *et al.* 2005).  
159 Light-induced stomatal opening is regulated via the AtROP2-AtRIC7 pathway. AtROP2  
160 and AtRIC7 are likely to impinge on vesicular trafficking by inhibiting AtExo70B1 which  
161 results in a diminished stomatal opening (Hong *et al.* 2016). These examples  
162 emphasize the importance of ROP proteins as signaling hubs for various  
163 developmental processes as well as the role RIC proteins play in finetuning the specific  
164 cellular responses. However, the function of RICs during the interaction with pathogens  
165 still remains to be elucidated.

166 Here we show results on barley RIC157, another CRIB domain-containing protein that  
167 interacts CRIB-dependently with RACB in yeast and *in planta*. Overexpression of  
168 RIC157 increases the powdery mildew penetration efficiency in barley leaf epidermal



169 cells in a RACB-dependent manner. Cytosolic RIC157 is recruited to the cell periphery  
170 specifically by activated RACB and both proteins co-localise at the haustorial neck  
171 during the compatible interaction with *Bgh*. Our findings indicate a possible role of the  
172 RACB-RIC157 signaling pathway in promoting fungal penetration, thereby increasing  
173 susceptibility towards *Bgh*.

174

## 175 **Results**

### 176 **Identification of RIC proteins in barley**

177 RIC proteins are characterised by their low molecular weight and a lack of sequence  
178 homology to any proteins in the database outside their CRIB domain (Wu *et al.* 2001).  
179 This conserved motif has been shown to interact directly with activated small GTPases  
180 (Burbelo *et al.* 1995, Aspenström 1999). In order to identify additional RIC proteins in  
181 barley, we performed a BLAST search using the CRIB motif of previously described  
182 RACB interacting protein RIC171 (Schultheiss *et al.* 2008) against the 2019 annotation  
183 of all barley coding sequences (Barley all CDS Morex v2.0 2019, [https://webblast.ipk-](https://webblast.ipk-gatersleben.de/barley_ibsc/)  
184 [gatersleben.de/barley\\_ibsc/](https://webblast.ipk-gatersleben.de/barley_ibsc/)). Beside RIC171, we identified another seven proteins  
185 sharing the properties of RIC proteins, and named them according to their predicted  
186 amino acid sequence length RIC153 (HORVU.MOREX.r2.3HG0258770), RIC157  
187 (HORVU.MOREX.r2.6HG0469110), RIC163 (HORVU.MOREX.r2.5HG0443720),  
188 RIC168 (HORVU.MOREX.r2.2HG0170820), RIC170  
189 (HORVU.MOREX.r2.6HG0521090), RIC171 (HORVU.MOREX.r2.2HG0164690),  
190 RIC194 (HORVU.MOREX.r2.3HG0258620), RIC236  
191 (HORVU.MOREX.r2.2HG0122110). An amino acid sequence alignment of all eight  
192 barley RIC proteins illustrated no general domain homologies beyond the highly  
193 conserved CRIB motif (Fig. 1). Interestingly, the CRIB motif was more C-terminally  
194 located in RICs 153, 163 and 194, similar to RIC2 and RIC4 of *Arabidopsis thaliana*  
195 (Wu *et al.* 2001), while the other RICs (157, 168, 170, 171 and 236) contained the  
196 CRIB motif closer to their N-terminal end. However, we didn't identify additional  
197 conserved domains shared by all members of the barley RIC protein family except for  
198 the CRIB domain.

199 RACB-mediated susceptibility towards powdery mildew is determined exclusively in  
200 barley leaf epidermal cells. Hence, in order to unravel downstream signaling  
201 components of RACB, we focused on barley leaf-expressed RIC proteins. Using online  
202 available gene expression databases (<https://webblast.ipk->

203 [gatersleben.de/barley\\_ibsc/](http://gatersleben.de/barley_ibsc/)), we identified five leaf-expressed *RIC* genes (*RIC153*,  
204 *RIC157*, *RIC163*, *RIC194* and previously published *RIC171* (Schultheiss *et al.* 2008).  
205 Despite there is little sequence conservation between RIC proteins outside their CRIB  
206 domain, we compared primary sequences of barley, *Arabidopsis thaliana* and rice  
207 (*Oryza sativa*) RICs using an available online amino acid motif discovery software  
208 (<http://meme-suite.org/tools/meme>). Interestingly, this discovered three more amino  
209 acid motifs shared by individual barley (*RIC157*, *RIC168*, *RIC171*), rice (Os02g06660.1,  
210 Os04g53580.1) and Arabidopsis RICs (*RIC10*, *RIC11*) (Suppl. Fig. S1).

211

### 212 **RIC157 increases susceptibility of barley towards *Bgh* in a RACB-dependent** 213 **manner**

214 To investigate a potential biological function of *RIC157* during the barley-powdery  
215 mildew interaction, we analysed the penetration success of *Bgh* on barley epidermal  
216 cells during various conditions (Fig. 2). Single cell transient overexpression of *RIC157*  
217 had a strong effect on the penetration success of *Bgh* into barley epidermal cells (Fig.  
218 2A). The susceptibility increased by about 50% compared to control treatments, an  
219 outcome that is reminiscent of susceptibility levels observed after transient RACB or  
220 *RIC171* overexpression (Schultheiss *et al.* 2003, 2008). Interestingly, we didn't  
221 observe the opposite effect, meaning a decreased fungal penetration after RNA  
222 interference (RNAi)-mediated silencing of *RIC157* compared to control levels (Fig. 2B).  
223 This suggests additional factors being involved in RACB-mediated susceptibility  
224 towards *Bgh*. To check if this elevated susceptibility of barley epidermal cells after  
225 overexpression of *RIC157* is dependent on endogenously present RACB, we analysed  
226 the fungal penetration efficiency by simultaneously overexpressing *RIC157* and  
227 transiently silencing endogenous RACB expression via RNAi (Fig. 2c). Interestingly,  
228 we did not observe an elevated fungal success rate, indicating that *RIC157* increases  
229 barley epidermal cell susceptibility in a RACB-dependent manner. We confirmed the  
230 efficiency of both RNAi silencing constructs via co-expression of fluorescence tag-  
231 labelled targets and ratiometric fluorescence measurements (Suppl. Fig. S2).

232

### 233 **RIC157 interacts directly with RACB in yeast and *in planta***

234 RACB can directly interact with CRIB motif-containing proteins *RIC171* and *MAGAP1*  
235 (Schultheiss *et al.* 2008, Hoefle *et al.* 2011). Therefore, it appeared likely that *RIC157*  
236 can directly interact with RACB via its CRIB domain. We conducted different

237 approaches to test for direct protein-protein interaction between RIC157 and RACB. In  
238 a targeted yeast-2-hybrid experiment, we showed that RIC157 directly interacts with  
239 RACB and we also confirmed the CRIB motif being essential for this interaction (Fig.  
240 3A, Suppl. Fig. S3). In yeast, RIC157 directly interacts with RACB and with the  
241 constitutively activated RACB mutant CARACB(G15V), but not with the dominant-  
242 negative, GDP-bound RACB mutant DNRACB(T20N). Interestingly, we also observed  
243 a certain level of interaction between RIC157 and lower nucleotide affinity RACB  
244 mutant DNRACB(D121N). This particular mutation has been shown previously in RAS  
245 mutant D119N to behave either in a constitutively activated or a dominant-negative  
246 way, depending on the experimental setup (Cool *et al.* 1999). To substantiate these  
247 results, we aimed to prove the fusion protein stability by immunoblotting (Suppl. Fig.  
248 S4). While all RACB variants were stably expressed and detectable, we were unable  
249 to confirm the stability of RIC157 variants in yeast in most of several independent  
250 experiments. Together with the fact that the yeast growth on selective medium was  
251 quite slow but dependent on the RIC157 construct, this suggests a high RIC157  
252 turnover in yeast.

253 In order to investigate the *in planta* interaction between RACB and RIC157, we  
254 performed Bimolecular Fluorescence Complementation (BiFC, synonym split-Yellow  
255 Fluorescent Protein (YFP)) experiments (Walter *et al.* 2004). We therefore fused N-  
256 terminally N- and C-terminal YFP truncations to RIC157 and RACB variants and  
257 transiently co-expressed complementary split-YFP fusion proteins in barley epidermal  
258 cells via particle bombardment. YFP fluorescence reconstitution was ratiometrically  
259 quantified against a co-expressed cytosolic mCherry fluorescence marker. As shown  
260 in Fig. 3C (and Suppl. Fig. S5A), YFP fluorescence was reconstituted to a significantly  
261 higher extent when split-YFP fusions of RIC157 were co-expressed with split-YFP  
262 fusions of RACB and CARACB(G15V), compared to co-expressions with  
263 DNRACB(T20N) and DNRACB(D121N). This suggests that *in planta*, RIC157 might  
264 preferentially interact with activated RACB. We confirmed the stability of split-YFP  
265 fusion proteins via immunoblot analysis of total protein samples extracted from  
266 transformed barley mesophyll protoplasts (Suppl. Fig. S5B).

267 Since split-YFP experiments do not unequivocally reveal direct protein-protein  
268 interaction, we further analysed the interaction between RACB and RIC157 by FLIM-  
269 FRET and in particular the Green Fluorescent Protein (GFP) lifetime reduction (Fig.  
270 3B). We fused mCherry N-terminally to RIC157 and GFP N-terminally to the activated



271 CARACB(G15V) and dominant-negative DNRACB(D121N) form and transiently co-  
272 expressed mCherry and GFP fusion combinations in barley epidermal cells via particle  
273 bombardment. Co-expression of GFP-DNRACB(D121N) and mCherry-RIC157  
274 resulted in an average GFP lifetime of about 2.6ns, which is very similar to the value  
275 we measure for GFP donor only expression. In contrast to that, the co-expression of  
276 mCherry-RIC157 with GFP-CARACB(G15V) led to a small but highly significant  
277 reduction in GFP lifetime to approximately 2.5ns. This GFP lifetime reduction clearly  
278 demonstrates a direct protein-protein interaction between RIC157 and activated RACB  
279 *in planta*.

280

### 281 **Recruitment of RIC157 to the cell periphery is RACB dependent**

282 Split-YFP fluorescence and GFP fluorescence during FLIM measurements localised  
283 predominantly to the cell periphery. To investigate the subcellular localisation of  
284 RIC157, we fused GFP N-terminally to RIC157 and transiently overexpressed this  
285 construct in barley epidermal cells via biolistic transformation. As shown in Figure 4A  
286 (upper row), RIC157 localises to the cytosol, but a lack of GFP fluorescence in the  
287 nucleoplasm indicated that GFP-RIC157 is excluded from the nucleus. However, we  
288 repeatedly observed a strong fluorescent signal around the nucleus suggesting a  
289 potential affinity of RIC157 to the nuclear envelope/endoplasmic reticulum membrane  
290 or proteins associated to it.

291 Since we found a direct protein-protein interaction between RIC157 and RACB, we  
292 checked the potential impact of RACB on the subcellular localisation of RIC157 by  
293 transiently co-expressing GFP-RIC157 with various untagged RACB forms (Suppl. Fig.  
294 S6). The cytoplasmic localisation of RIC157 is not significantly affected in the presence  
295 of RACB or the dominant negative DNRACB(D121N) mutant. However, we observed  
296 a decrease in cytoplasmic and nuclear envelope-localised GFP fluorescence and an  
297 accumulation of GFP fluorescence at the cell periphery when GFP-RIC157 was co-  
298 expressed with the constitutively activated CARACB(G15V) form.

299 Because untagged proteins cannot be properly monitored, we extended our analysis  
300 in barley epidermal cells using mCherry-tagged variants of RACB (Fig. 4A). Similarly,  
301 we detected GFP-RIC157 in the cytoplasm where it co-localised with mCherry fusions  
302 of RACB and DNRACB(D121N). In contrast to that, as with the untagged activated  
303 RACB, we detected a similarly strong re-localisation of GFP-RIC157 to the cell  
304 periphery in the presence of mCherry-tagged CARACB(G15V) that likewise

305 accumulated at this site. This suggests that activated RACB, like other ROPs  
306 associating with the plasma membrane probably via its C-terminal prenylation and  
307 possible palmitoylation (Schultheiss *et al.* 2003, Yalovsky 2015), recruits RIC157 to  
308 the cell periphery.

309 In order to check if this RIC157 recruitment to the cell periphery is due to the co-  
310 expression with activated RACB, we simultaneously transformed barley epidermal  
311 cells with a RNAi construct to silence RACB (Fig. 4B). Without RACB silencing, co-  
312 expression of GFP-RIC157 and mCherry-CARACB(G15V) again lead to accumulation  
313 of both fusions proteins at the cell periphery. RNAi-mediated silencing of RACB on the  
314 other hand did not only diminish the mCherry fluorescence to almost non-detectable  
315 levels demonstrating a successful RACB silencing, it also decreased GFP  
316 fluorescence at the cell periphery and increases GFP fluorescence in the cytoplasm.  
317 This result clearly supports that the observed recruitment of RIC157 to the cell  
318 periphery is mediated by activated RACB.

319

### 320 **RIC157 and RACB co-localise and accumulate at penetration site**

321 Co-localisation experiments in unchallenged barley epidermal cells demonstrated a  
322 recruitment of RIC157 to the cell periphery in the presence of activated RACB. In order  
323 to investigate, if both proteins co-localise at a more specific subcellular site during the  
324 interaction with the powdery mildew fungus, we analysed the localisation of transiently  
325 co-expressed RIC157 and CARACB(G15V) in epidermal barley cells 18-24 hours after  
326 inoculation with *Bgh*. As shown in Fig. 5, fluorescent protein fusions of RIC157 and  
327 activated RACB accumulate close to the fungal penetration site, forming a cone  
328 outlining the neck of a developing haustorial initial. The RIC157/CARACB(G15V) co-  
329 localisation was much more defined than the fluorescence signal of simultaneously  
330 expressed cytoplasmic mCherry (Fig. 5B), indicating a specific membrane-associated  
331 co-localisation in epidermal cells that are successfully penetrated by the fungus.

332

333

### 334 **Discussion**

335 The activity of the ROP protein RACB appears to be disadvantageous for barley in the  
336 presence of *Bgh*. To date, however, our knowledge about the exact RACB-regulated  
337 cellular process(es), the fungus takes advantage of, is still quite limited. Albeit we  
338 observed a role of RACB or RACB-interacting proteins in polar cell development and

339 cytoskeleton organization (Opalski *et al.* 2005; Hoefle *et al.* 2011; Huesmann *et al.*  
340 2012; Scheler *et al.* 2016; Nottensteiner *et al.* 2018), a direct mechanistic link between  
341 RACB-mediated susceptibility and RACB-regulated cytoskeleton organisation or polar  
342 membrane trafficking is still missing. Our studies, however, open up the prospect of a  
343 RACB-regulated pathway via a ROP-specific scaffold protein that might be exploited  
344 in barley epidermal cells by *Bgh* to support susceptibility towards powdery mildew.

345

### 346 **RIC proteins as scaffolds in RACB downstream signalling**

347 In a signalling cascade, scaffold proteins are as vital for mediating the molecular  
348 response as upstream signalling hubs or downstream executors. These scaffolds  
349 establish not just a hub-executor connection, but by doing so they represent also the  
350 first branching point in the signalling cascade that eventually leads to specific effects  
351 without possessing any kind of enzymatic activity themselves (Zeke *et al.* 2009, Good  
352 *et al.* 2011). Regarding signalling pathways, ROPs function as signalling hubs and  
353 have been shown to be involved in loads of cellular processes and for some ROPs the  
354 regulatory role in different, sometimes even antagonistic signalling pathways has been  
355 described (Gu *et al.* 2005; Nibau *et al.* 2006; Feiguelman *et al.* 2018). If ROPs do not  
356 interact directly with downstream executors, RIC proteins (and also ICRs/RIPs, Mucha  
357 *et al.* 2010, McCollum *et al.* 2019 Preprint) are considered bridging units creating the  
358 scaffold for specific branches of ROP signalling (Schultheiss *et al.* 2008, Craddock *et al.*  
359 *et al.* 2012, Zhou *et al.* 2015, Hong *et al.* 2016). The presence of a CRIB motif without  
360 any further sequence homology to known proteins defines a RIC protein (Wu *et al.*  
361 2001). The CRIB motif enables RIC proteins to directly interact with ROPs, as for  
362 instance described for the *Arabidopsis thaliana* ROP2-RIC4 and ROP6-RIC1  
363 interaction or for the barley RACB-RIC171 interaction (Fu *et al.* 2005, Schultheiss *et al.*  
364 *et al.* 2008, Fu *et al.* 2009). Beside RIC171, we identified another seven proteins of  
365 different sizes in barley that, by the above-mentioned definition, we consider RIC  
366 proteins. Apparently there is a difference between monocots and dicots regarding the  
367 number of RIC proteins (Wu *et al.* 2001), similar to RIP proteins (McCollum *et al.* 2019  
368 Preprint), suggesting a higher probability of either functional redundancies,  
369 diversification or antagonistic partners in dicots (Gu *et al.* 2005). Redundancies  
370 between the barley leaf-expressed RIC proteins are, considering the low primary  
371 sequence conservation, hard to predict and not known yet. The partial similarities  
372 between leaf-expressed RIC157 and RIC171 (Suppl. Fig. 1) could however indicate

373 that these two RIC proteins are either essential co-ligands, redundant scaffold proteins  
374 or even antagonizing members of the same signalling pathway.

375

### 376 **RIC157 increases susceptibility towards powdery mildew**

377 In this study, we concentrated on leaf-expressed RIC157 and show, that the transient  
378 RIC157 overexpression leads to a strong increase in barley epidermal cell  
379 susceptibility towards powdery mildew infection (Fig. 2A). Thus, the fungus explicitly  
380 benefits from a highly abundant RIC157. The RNA interference-mediated silencing of  
381 RIC157, however, did not lead to a higher resistance compared to control-treated cells  
382 (Fig. 2B). This could have different reasons. Although we have shown a significant  
383 reduction of RIC157 protein levels in the presence of the RIC157 RNAi silencing  
384 construct (Suppl. Fig. S2), it must be noted that RNAi-based silencing is never 100%  
385 efficient. Remaining endogenous RIC157 transcript levels might be sufficient to allow  
386 for control level penetration efficiencies. Additionally, the protein turnover rate of  
387 RIC157 is unknown, meaning even with a high RNAi silencing efficiency it is still  
388 possible that RIC157 protein, expressed before the transformation with the RNAi  
389 silencing construct, is present throughout the infection assay and sufficiently abundant  
390 to mask an otherwise more resistant phenotype. Another very important point that  
391 needs to be stressed is the function of RACB or ROPs in general as signalling hubs  
392 (Nibau *et al.* 2006). The signalling via RIC157 is likely not the only RACB-regulated  
393 path that leads to susceptibility. Shutting down the particular RACB-RIC157 route  
394 probably still leaves other RACB signalling pathways functional, which are also  
395 involved to a certain extent in RACB-mediated susceptibility. An increased resistance  
396 towards fungal infection is only achieved once the signaling hub is removed or switched  
397 off by silencing RACB or by transient overexpression of MAGAP1 (Hoeftle *et al.* 2011).  
398 In accordance with this, RACB-dependency of the RIC157-promoted susceptibility  
399 (Fig. 2C) suggests that even abundant RIC157 still requires the presence of RACB to  
400 function as a susceptibility factor.

401

### 402 **RIC157 interacts with RACB and is recruited to the cell periphery**

403 We have demonstrated that RIC157 can interact directly with RACB in yeast and *in*  
404 *planta* (Fig. 3). In barley epidermal cells, RIC157 showed interaction with activated  
405 RACB, but not with either dominant negative form. The observed interaction in yeast  
406 between RIC157 and the dominant-negative form DNRACB(D121N) could be

407 explained by the different experimental setups and/or biological backgrounds. G-  
408 proteins with this particular mutation have been observed previously to behave either  
409 dominant-negative or constitutively activated (Cool *et al.* 1999). DNRACB(D121N) has  
410 an intrinsic lower nucleotide affinity, however in yeast this form might be GTP bound  
411 and hence resemble the activated RACB.

412 The subcellular *in planta* RACB-RIC157 interaction site seen in BiFC and FLIM-FRET  
413 experiments appeared to be at the cell periphery. This seems conclusive, because  
414 RIC157 preferentially interacted with activated RACB. Activated ROPs are supposed  
415 to be associated with negatively charged phospholipids in plasmamembrane  
416 nanodomains, which is additionally promoted via posttranslational prenylation and S-  
417 acylation (Yalovsky 2015, Platre *et al.* 2019). Fluorescence-tagged RIC157 alone did  
418 not show any specific localisation in the absence of the fungus, although it seems to  
419 be excluded from the nucleus (Fig. 4). In the presence of activated RACB, however,  
420 RIC157 undergoes a relocation from the cytoplasm to the cell periphery, where the  
421 interaction with the activated ROP takes place. It had been previously shown that  
422 expression of activated GFP-RACB alone leads to its preferential localisation at the  
423 cell periphery with a cytosolic background (Schultheiss *et al.* 2003). We assume that a  
424 potential influence of endogenous levels of RIC157 or activated RACB on the  
425 localisation of their overexpressed interaction partner is probably negligible in our  
426 experimental setup. A similar recruitment to the cell periphery has been observed with  
427 other proteins that directly interact with activated RACB (Schultheiss *et al.* 2008,  
428 Huesmann *et al.* 2012, McCollum *et al.* 2019 Preprint), reinforcing the model that  
429 RACB activation is preceding the recruitment of interaction partners and that  
430 downstream RACB signaling is initiated at the plasma membrane. This is further  
431 supported since a RACB mutant version lacking the C-terminal CSIL motif for  
432 prenylation localizes to the cytoplasm and is inactive in promoting susceptibility  
433 (Schultheiss *et al.* 2003).

434 With regard to RACB's and RIC157's capability to support fungal infection, the  
435 recruitment of RIC157 to the cell periphery becomes even more interesting. Our data  
436 suggest a recruitment of RIC157 to the attempted fungal penetration site (Fig. 5). The  
437 cone-like structure surrounding the haustorial neck indicates a subcellular co-  
438 localisation with activated RACB. However, the co-localisation of RACB and fungal  
439 infection-supporting RACB-interactors is not exclusive to RIC157. RIC171 and RIPb,  
440 two proteins also considered scaffolds in RACB signalling, co-localise at the haustorial



441 neck (Schultheiss *et al.* 2008, Hückelhoven and Panstruga 2011; McCollum *et al.* 2019  
442 Preprint). Future experiments may show, whether subcellular co-concentration of  
443 RACB and RACB-interacting proteins indicate a specific lipid composition of the  
444 haustorial neck, which then recruits activated ROPs, or a membrane domain of high  
445 ROP activity due to local GEF activity, or perhaps indicates an exclusion of ROPs from  
446 further lateral diffusion into the EHM, which was suggested to be controlled at the  
447 haustorial neck (Koh *et al.* 2005).

448

### 449 **RIC157 and susceptibility**

450 RIC157 transiently overexpressed in barley epidermal cells localises to the cytoplasm  
451 and enhances fungal penetration efficiency in a RACB-dependent manner. Activated  
452 RACB, however, associates with the plasma membrane where it likely recruits RIC157  
453 for downstream signalling. Thus, transiently overexpressed and endogenous RIC157  
454 might promote RACB-mediated susceptibility upon recruitment to the cell periphery by  
455 endogenously present activated RACB. Only a small fraction of overexpressed RIC157  
456 is possibly recruited to the cell periphery without concomitant co-overexpression of  
457 activated RACB. This means that such a minute fluorescence localisation change  
458 might prove difficult to be detected, but it needs to be emphasized that we do not  
459 assume RIC157 promoting susceptibility to powdery mildew from a solely cytoplasmic  
460 site. Indeed, in front of a cytoplasmic background, RIC157 is also visible at the cell  
461 periphery without co-expression of CARACB(G15V), possibly reflecting partial  
462 recruitment by endogenous ROPs (Fig. 4A).

463 The domain and sequence similarity between barley RIC157 and *Arabidopsis thaliana*  
464 RIC10 and RIC11 (Suppl. Fig. 1) does not necessarily indicate similar functions of both  
465 proteins. Beside AtRIC10 and AtRIC11, for which nothing is known to date about their  
466 biological function, RIC157 also shares some amino acid motif similarity with AtRIC1,  
467 AtRIC3 and AtRIC7 (Suppl. Fig. 7), for which an involvement in cytoskeleton  
468 organization has previously been demonstrated. From these three *Arabidopsis* RIC  
469 proteins, AtRIC1 appears to be an interesting candidate from which a RIC157 function  
470 could be deduced. AtRIC1 has been shown to interact with ROP6 to activate the p60  
471 subunit of Katanin (KTN1), a microtubule-severing enzyme (Lin *et al.* 2013), as  
472 opposed to the interaction with AtROP2 that negatively regulates the action of AtRIC1  
473 on microtubules (Fu *et al.* 2005). The microtubule-severing activity of KTN1 might even  
474 be regulated by AtROP2, AtROP4 and AtROP6 (Ren *et al.* 2017) via AtRIC1. Whether

475 barley RIC157 also fulfils such a regulatory role in organising microtubules still remains  
476 to be seen. Regarding the subcellular localisation there are, however, clear  
477 differences: Barley RIC157 localises to the cytoplasm, AtRIC1 associates with  
478 microtubules (Fu *et al.* 2005). However, when microtubule arrays in penetrated and  
479 attacked but non-penetrated barley epidermal cells were compared, penetration  
480 success was strongly associated with parallel non-polarized microtubule arrays in the  
481 cell cortex and a diffuse or depleted microtubule structure at the haustorial neck (Hoefle  
482 *et al.* 2011). AtRIC3 has been shown to be involved in the pollen tube growth process,  
483 where its function leads to actin disassembly in a ROP1-dependent manner upon  
484 calcium influx into the cytoplasm (Gu *et al.* 2005, Lee *et al.* 2008). Likewise, AtRIC7  
485 was recently reported to influence vesicle trafficking in stomata resulting in the  
486 suppression of an elevated stomatal opening after ROP2-dependent inhibition of the  
487 exocyst complex *via* Exo70B1 (Hong *et al.* 2016). Both F-actin organization and  
488 exocyst function are important in penetration resistance to *Bgh* (Opalski *et al.* 2005;  
489 Miklis *et al.* 2007; Ostertag *et al.* 2012). Therefore, the discovery of RIC157 as a RACB-  
490 dependent susceptibility factor may pave the way to a better understanding of ROP-  
491 steered processes that are pivotal for fungal invasion into barley epidermal cells. The  
492 challenge will be to find the downstream factors that RIC157 activates and to  
493 understand how RIC157 interacts with RACB in the presence of several other RACB  
494 interactors. We assume that several diverse RICs and ICR/RIP proteins could form a  
495 cooperative network for orchestrating F-actin, microtubule and membrane organization  
496 at the site of fungal entry.

497

## 498 **Experimental procedures**

### 499 **Plant and fungal growth conditions**

500 Wildtype barley (*Hordeum vulgare*, cultivar „Golden Promise“) was cultivated in long  
501 day conditions (16 hours day light, 8 hours darkness) at a temperature of 18°C with a  
502 relative humidity of 65% and a light intensity of 150 $\mu$ mol s<sup>-1</sup> m<sup>-2</sup>.

503 The biotrophic powdery mildew fungus *Blumeria graminis* f.sp. *hordei* A6 was used in  
504 all experiments. It was cultivated and propagated on barley „Golden Promise“ under  
505 the same condition described above.

506

### 507 **Cloning of constructs**

508 Via a Two-Step Gateway cloning approach, in a first PCR *RIC157*  
509 (HORVU.MOREX.r2.6HG0469110) was amplified from a barley cDNA pool prepared  
510 from leaf and epidermal peels using gene-specific primers RIC157\_GW\_for and  
511 RIC157\_GW\_rev+STOP (Suppl. Table 1) creating an incomplete Gateway attachment  
512 site overhang. A second PCR using primers attB1 and attB2 completed the attachment  
513 sites. To create a Gateway entry clone of *RIC157*, the amplified product was  
514 recombined into pDONR223 (Invitrogen) via BP-reaction using Gateway BP Clonase™  
515 II according to manufacturer's instruction (Thermo Fisher Scientific). To clone  
516 *RIC157ΔCRIB*, both fragments upstream and downstream of CRIB motif were  
517 amplified separately using primers RIC157\_GW\_for and RIC157delCRIB\_rev for  
518 PCR1, RIC157delCRIB\_for and RIC157\_GW\_rev+STOP for PCR2, creating  
519 overlapping overhangs. In PCR3 both fragments together with primers  
520 RIC157\_GW\_for and RIC157\_GW\_rev+STOP completed *RIC157ΔCRIB* with  
521 incomplete Gateway attachment sites overhangs. Completion of attachment sites  
522 and creating an entry clone in pDONR223 was done as described above. To clone  
523 *RIC157-H37Y-H40Y*, a site-directed mutagenesis using primers  
524 CRIB157H37&40Y\_for and CRIB157H37&40Y\_rev was performed according to  
525 QuikChange® Site-Directed Mutagenesis Protocol (Stratagene). For cloning entry  
526 constructs of *RACB* variants, primers RACB\_GW\_for and RACB\_GW\_rev were used  
527 to amplify *RACB* from previously described constructs (Schultheiss *et al.* 2003) and  
528 cloned into pDONR223 via BP as described above. To clone *DNRACB(D121N)*, a site-  
529 directed mutagenesis using primers RACB\_D121N\_fw and RACB\_D121N\_rv was  
530 performed according to QuikChange® Site-Directed Mutagenesis Protocol  
531 (Stratagene).

532 For RNA interference (RNAi) silencing of *RIC157* in barley, we PCR-amplified two  
533 *RIC157* fragments, a 97bp fragment with primers RIC157\_RNAi\_NotI\_for and  
534 RIC157\_RNAi\_EcoRI\_rev containing NotI and EcoRI restriction sites, and a 324bp  
535 fragment with primers RIC157\_RNAi\_EcoRI\_for and RIC157\_RNAi\_XbaI\_rev  
536 containing EcoRI and XbaI restriction sites. After restriction digest of all sites, ligating  
537 into pIPKTA38 via NotI and XbaI sites we created a *RIC157\_RNAi* entry construct  
538 lacking the CRIB motif nucleotide sequence to prevent off-target silencing of other  
539 CRIB-domain containing RNAs. The *RIC157\_RNAi* sequence was then cloned via LR  
540 reaction using Gateway LR Clonase™ II according to manufacturer's instruction

541 (Thermo Fisher Scientific) into RNAi expression plasmid pIPKTA30N to create a  
542 double-strand RNAi expression construct (Douchkov *et al.* 2005).

543 For Yeast-2-Hybrid expression clones, entry clones of *RIC157* and *RACB* variants  
544 were introduced into prey plasmid pGADT7-GW and pGBKT7-GW via LR reaction  
545 using Gateway LR Clonase™ II according to manufacturer's instruction (Thermo Fisher  
546 Scientific). pGADT7-GW and pGBKT7-GW have been modified from pGADT7 and  
547 pGBKT7 (Clontech) into a Gateway-compatible form using Gateway™ Vector  
548 Conversion System (Thermo Fisher Scientific). To create *RACB* variants lacking C-  
549 terminal prenylation sequence, a premature STOP-Codon was introduced by site-  
550 directed mutagenesis as described above using primers delCSIL\_for and delCSIL\_rev.  
551 In order to clone BiFC constructs, we PCR amplified a *RIC157* full-length fragment with  
552 primers RIC157\_BamHI\_for and RIC157\_KpnI\_rev containing BamHI and KpnI  
553 restriction sites. After restriction digest, we ligated this construct into pUC-  
554 SPYNE(R)173 (Waadt *et al.* 2008).

555 For localisation and overexpression studies in barley, *RIC157* and *RACB* variants in  
556 pDONR223 were used as entry constructs to clone them into various pGY1-based  
557 CaMV35S promoter-driven expression vectors (Schweizer *et al.* 1999) via LR reaction  
558 as described above. Empty pGY1 (encoding for no tag) was rendered Gateway-  
559 compatible via Gateway™ Vector Conversion System (Thermo Fisher Scientific). To  
560 create expression vectors for proteins C- or N-terminally tagged by GFP or mCherry,  
561 Gateway Reading Frame Cassettes for C- and N-terminal fusions, respectively, were  
562 integrated into a pGY1-plasmid backbone upon XbaI digestion and combined at 5' or  
563 3' with sequences of monomeric GFP or mCherry. Cloning procedure was performed  
564 using In-Fusion HD cloning kit (Takara Bio USA). Constructs for GFP and mCherry  
565 upstream or downstream of the Gateway cassette were amplified using primers  
566 GW\_RfA\_mCherry-F, GW\_RfA\_mGFP-F, GW\_RfA\_Xba-R, GW\_Xba\_RfB-F,  
567 GW\_RfB-R, mGFP-STP-F, mCherry-STP-F, XFP-noSTP\_Xba-F, XFP-noSTP-R,  
568 mGFP-noSTP-R, mCherry-STP\_Xba-R and mGFP-STP\_Xba-R.

569 The *RACB* RNAi construct, *RACB* BiFC constructs have been described previously  
570 (Schultheiss *et al.* 2003, Schultheiss *et al.* 2008, Schnepf *et al.* 2018, McCollum *et al.*  
571 2019 Preprint).

572

573 **Barley epidermal cell transformation and penetration efficiency assessment**

574 For transient overexpression in barley, primary leaf epidermal cells of 7d old plants  
575 were transformed using biolistic bombardment with 1µm gold particles that were  
576 coated with 2µg of each test plasmid and additionally with 1µg of a cytosolic  
577 transformation marker. After mixing the gold particles with plasmid combinations,  
578 CaCl<sub>2</sub> (0.5M final concentration) and 3.5µl of 2mg/ml Protamine (Sigma) were added  
579 to each sample. The gold particle solution was incubated at room temperature for  
580 30min, washed twice with 500µl Ethanol (first 70%, then 100%) and eventually  
581 dissolved in 6µl 100% ethanol per biolistic transformation. After shooting, leaves were  
582 incubated at 18°C.

583 For localisation and BiFC experiments, leaves were analysed 2 days after  
584 transformation. For FRET-FLIM analysis of RACB-RIC157 interaction, barley primary  
585 leaves of 7d old plants were transiently transformed. Therefore, 2ug of meGFP-RACB  
586 and 1ug mCherry-RIC157 containing plasmids were coated on gold particles for  
587 biolistic transformation of single barley epidermal cells.

588 For inoculation with *Bgh*, fungal spores were manually blown in a closed infection  
589 device over transformed leaves either 6 hours after transformation (for microscopic  
590 analyses 16 hours after inoculation) or 1 day after transformation (to check penetration  
591 efficiency 48 hours after inoculation).

592 To analyse penetration efficiency, a transient assay system based on a cytosolic GUS  
593 marker was used as described previously (Schweizer *et al.* 1999). The reporter gene  
594 construct pUbiGUSPlus was a gift from Claudia Vickers (Addgene plasmid # 64402;  
595 <http://n2t.net/addgene:64402>; RRID:Addgene\_64402, Vickers *et al.* 2003). Additionally  
596 to overexpression or RNAi silencing constructs, each barley leaf was co-transformed  
597 with pUbiGUSPlus. 48 hours after *Bgh* inoculation, leaves were submerged in GUS  
598 staining solution (0.1M Na<sub>2</sub>HPO<sub>4</sub>/NaH<sub>2</sub>PO<sub>4</sub> pH 7.0, 0.01 EDTA, 0.005M Potassium  
599 hexacyanoferrat (II), 0.005M Potassium hexacyanoferrat (III), 0.1% (v/v) Triton X-100,  
600 20% (v/v) Methanol, 0.5mg/mL 1.5-bromo-4-chloro-3-indoxyl-β-D-glucuronic acid). For  
601 the solution to enter the leaf interior, a vacuum was applied. The leaves were incubated  
602 at 37°C over night in GUS staining solution and subsequently for at least 24 hours in  
603 70% Ethanol. Fungal structures were stained with ink-acetate solution (10% ink, 25%  
604 acetic acid). Transformed cells were identified after GUS staining with light microscopy.  
605 An established haustorium was considered a successful penetration and for each  
606 sample at least 50 interactions were analysed. Barley epidermal cells transformed with  
607 the empty expression plasmid were used as negative control.



608

## 609 **Barley protoplast preparation and transformation**

610 To prepare protoplasts from barley mesophyll cells, the lower epidermis of primary  
611 leaves from 7 day-old barley plants was peeled and the leaves were incubated 3 to 4  
612 hours at room temperature in the darkness while floating with the open mesophyll  
613 facing downwards on an enzymatic digestion solution: 0.48M mannitol, 0.3% (w/v)  
614 Gamborg B5, 10mM MES pH 5.7, 10mM CaCl<sub>2</sub>, 0.5% (w/v) Cellulase R10, 0.5% (w/v)  
615 Driselase, 0.5% Macerozyme R10. After enzymatic treatment, an equal amount of W5  
616 solution was added: 125mM CaCl<sub>2</sub>, 154mM NaCl, 5mM KCl, 2mM MES pH 5.7. Upon  
617 filtering through a 40µm nylon mesh, the protoplasts were pelleted 5min at 200g and  
618 carefully resuspended in 10ml W5 solution. After another centrifugation step, the  
619 protoplast concentration was adjusted to 2 x 10<sup>6</sup> cells per mL in MMG solution: 0.4M  
620 mannitol, 15mM CaCl<sub>2</sub>, 2mM MES pH 5.7. For each transformation sample, 1mL  
621 protoplast solution was mixed with 50µg of each plasmid and 1.1mL PEG solution  
622 (40% (w/v) PEG4000, 0.1M mannitol, 0.2M CaCl<sub>2</sub>) and incubated 20min at room  
623 temperature in the darkness. Afterwards, 4.4mL of W5 solution was added to each  
624 transformation and gently mixed. After another pelleting at 200g, the protoplasts were  
625 resuspended in 1mL W1 solution (0.5M mannitol, 20mM KCL, 4mM MES pH 5.7) and  
626 incubated in the darkness at room temperature for at least 16 hours.

627

## 628 **Yeast-2-Hybrid**

629 Yeast strain AH109 was transformed with bait (pGBKT7) and prey (pGADT7)  
630 constructs by following the small scale yeast transformation protocol from  
631 Yeastmaker™ Yeast Transformation System 2 (Clontech). Upon transformation, yeast  
632 cells were plated on Complete Supplement Medium (CSM) plates lacking leucine and  
633 tryptophan (LW) and incubated for 3 days at 30°C. A single colony was taken to  
634 inoculate 5mL of LW-dropout liquid medium that was incubated with shaking over night  
635 at 30°C. The next day, 2mL of culture was pelleted for immunoblot analyses. 7.5µL of  
636 undiluted overnight culture (and additionally a 1:10, 1:100 and 1:1000 for control  
637 purposes) were dropped on CSM plates lacking leucine and tryptophan, and also on  
638 CSM plates lacking leucine, tryptophan and adenine. Plates were incubated for at least  
639 3 days at 30°C. Growth on CSM-LW plates confirmed the successful transformation of  
640 both bait and prey plasmids, while growth on CSM-LWAde plates indicated activation

641 of reporter genes. As control for a positive and direct protein-protein interaction we  
642 routinely used murine p53 and the SV40 large T-antigen (Li and Fields 1993).

643

### 644 **Immunoblot analysis**

645 For total protein extraction from yeast, we followed the protocol described in Kushnirov  
646 (2000) using 2mL of over night culture of yeast transformants grown in CSM-LW liquid  
647 medium. The extraction of total protein from barley mesophyll protoplasts was  
648 performed by pelleting transformed protoplasts 5min at 200g. The pellet was  
649 resuspended thoroughly in 50 $\mu$ L of 2x SDS loading buffer by vortexing. A complete  
650 protein denaturation was achieved by boiling protoplast samples 10min at 95°C. After  
651 shortly spinning down the samples, the stability of fusion proteins in yeast and in planta  
652 was assessed via Sodium dodecylsulfate-polyacrylamide gel electrophoresis (SDS-  
653 PAGE) and immunoblotting on PVDF membranes. Antibodies used for detecting  
654 protein bands on PVDF membranes came from SantaCruz Biotechnology  
655 (<https://www.scbt.com/scbt/cart/cart.jsp>): anti-GFP(B-2), anti-cMyc(9E10), anti-HA(F-  
656 7) and horseradish-peroxidase conjugated anti-mouse. Presence of antibodies on  
657 membrane was visually detected by using SuperSignal West Femto  
658 Chemiluminescence substrate (ThermoFisher Scientific). Equal protein loading and  
659 blotting success was confirmed via Ponceau S-staining of the PVDF membrane.

660

### 661 **Microscopy**

662 Localisation and BiFC experiments were analysed on a Leica TCS SP5 confocal laser  
663 scanning microscope. The excitation laser wavelengths were 458nm for CFP, 488nm  
664 for GFP, 514nm for YFP and 561nm for RFP and mCherry, respectively. The  
665 fluorescence emission was collected from 462 to 484nm for CFP, from 500-550nm for  
666 GFP, from 515 to 550nm for YFP and from 569 to 610nm for RFP and mCherry. Barley  
667 epidermal cells were imaged via sequential scanning as z-stacks in 2 $\mu$ m increments.  
668 Maximum projections of each z-stack were exported as Tiff files from the Leica LAS  
669 AF software (version 3.3.0).

670 Localisation experiments of fluorescent protein fusions and BiFC analysis in barley  
671 epidermal cells were conducted from 24 hours until 48 hours after biolistic  
672 transformation. Regarding ratiometric BiFC quantification using Leica LAS AF  
673 software (version 3.3.0), the fluorescence intensity was evaluated over the whole cell  
674 area and the ratio between YFP and cytosolic mCherry fluorescence signal was

675 calculated. For each BiFC combination, the fluorescence of at least 20 cells was  
676 measured.

677 For FRET-FLIM analysis of RACB-RIC157 interaction, the expression of the  
678 fluorophore-fusion proteins was analysed 2 days after transformation using an  
679 Olympus FluoView™3000 inverse laser scanning confocal microscope with an  
680 UPLSAPO 60XW 60x/NA 1.2/WD 0.28 water immersion objective (Olympus,  
681 Hamburg, Germany). Fluorescence of GFP was collected between 500-540nm and  
682 mCherry emission was imaged between 580-620nm upon excitation with 488 and  
683 561nm argon laser lines, respectively. For FRET-FLIM measurements the PicoQuant  
684 advanced FCS/FLIM-FRET/rapidFLIM upgrade kit (PicoQuant, Berlin, Germany) was  
685 used, comprising a 485nm pulsed laser line for GFP excitation (pulse rate 40 mHz,  
686 laser driver: PDL 828 SEPIA II, laser: LDH-D-C-485), a Hybrid Photomultiplier Detector  
687 Assembly 40 to detect GFP fluorescence and a TimeHarp 260 PICO Time-Correlated  
688 Single Photon Counting module (resolution 25 ps) to measure photon life times. GFP  
689 fluorescence was imaged at the aequatorial plane of epidermis cells to capture GFP  
690 fluorescence at the cell periphery and possibly plasma membrane. For each interaction  
691 at least 16 cells were analysed and 300 to 600 photons per pixel were recorded. Decay  
692 data within a region of interest were fitted using an n-exponential reconvolution fit with  
693 model parameters n=3 and calculated instrument response function of the PicoQuant  
694 SymPhoTime 64 software.

695

## 696 **Supplemental Data**

697 **Suppl. Fig. S1: Barley RIC157 shows limited sequence similarity to RIC1 from**  
698 ***Arabidopsis thaliana***

699 **Suppl. Fig. S2: RNA interference silencing efficiency**

700 **Suppl. Fig. S3: CRIB deletion and CRIB mutation in RIC157 prevents interaction**  
701 **with RACB in yeast**

702 **Suppl. Fig. S4: Protein stability in yeast**

703 **Suppl. Figure S5: Raciometric BiFC analyses and BiFC fusion protein stability**

704 **Suppl. Fig. S6: RIC157 is recruited to the cell periphery by activated RACB**

705 **Suppl. Fig. S7: Barley RIC157 shows limited sequence similarity to RIC proteins**  
706 **from *Arabidopsis thaliana*.**

707 **Suppl. Table 1: Primers used in this study**

708

## 709 **References**

710 **Akamatsu, A., Wong, H.L., Fujiwara, M., Okuda, J., Nishide, K., Uno, K., Imai, K.,**  
711 **Umemura, K., Kawasaki, T., Kawano, Y. and Shimamoto, K. (2013).** An  
712 OsCEBiP/OsCERK1-OsRacGEF1-OsRac1 module is an essential early component of  
713 chitin-induced rice immunity. *Cell Host Microbe* **13**, 465-476.

714

715 **Aspenström, P. (1999).** Effectors for the Rho GTPases. *Curr. Opin. Cell Biol.* **11**, 95-  
716 102.

717

718 **Basu, D., Le, J., Zakharova, T., Mallery, E.L. and Szymanski, D.B. (2008).** A  
719 SPIKE1 signaling complex controls actin-dependent cell morphogenesis through the  
720 heteromeric WAVE and ARP2/3 complexes. *Proc. Natl. Acad. Sci. USA* **105**, 4044-  
721 4049.

722

723 **Berken, A., Thomas, C. and Wittinghofer, A. (2005).** A new family of RhoGEFs  
724 activates the Rop molecular switch in plants. *Nature* **436**, 1176-1180.

725

726 **Berken, A. and Wittinghofer, A. (2008).** Structure and function of Rho-type molecular  
727 switches in plants. *Plant Physiol. Biochem.* **46**, 380-393.

728

729 **Białas, A., Zess, E.K., De la Concepcion, J.C., Franceschetti, M., Pennington,**  
730 **H.G., Yoshida, K., Upson, J.L., Chanclud, E., Wu, C.-H., Langner, T., Maqbool, A.,**  
731 **Varden, F.A., Derevnina, L., Belhaj, K., Fujisaki, K., Saitoh, H., Terauchi, R.,**  
732 **Banfield, M.J. and Kamoun, S. (2018).** Lessons in effector and NLR biology of plant-  
733 microbe systems. *Mol. Plant Microbe Interact.* **31**, 34-45.

734

735 **Boller, T. and Felix, G.** (2009). A renaissance of elicitors: perception of microbe-  
736 associated molecular patterns and danger signals by pattern-recognition receptors.  
737 *Annu. Rev. Plant Biol.* **60**, 379-406.

738

739 **Boulter, E., and Garcia-Mata, R.** (2010). RhoGDI: A rheostat for the Rho switch. *Small*  
740 *GTPases* **1**, 65-68.

741

742 **Brembu, T., Winge, P., Bones, A.M. and Yang, Z.** (2006). A RHOse by any other  
743 name: a comparative analysis of animal and plant Rho GTPases. *Cell Res.* **16**, 435-  
744 445.

745

746 **Burbelo, P.D., Drechsel, D. and Hall, A.** (1995). A conserved binding motif defines  
747 numerous candidate target proteins for both Cdc42 and Rac GTPases. *J. Biol. Chem.*  
748 **270**, 29071-29074.

749

750 **Chen, X. and Friml, J.** (2014). Rho-GTPase-regulated vesicle trafficking in plant cell  
751 polarity. *Biochem. Soc. Trans.* **42**, 212-218.

752

753 **Cool, R.H., Schmidt, G., Lenzen, C.U., Prinz, H., Vogt, D. and Wittinghofer, A.**  
754 (1999). The Ras mutant D119N is both dominant negative and activated. *Mol. Cell.*  
755 *Biol.* **19**, 6297-6305.

756

757 **Craddock, C., Lavagi, I. and Yang, Z.** (2012). New insights into Rho signaling from  
758 plant ROP/Rac GTPases. *Trends Cell Biol.* **22**, 492-501.

759

760 **Douchkov, D., Nowara, D., Zierold, U. and Schweizer, P.** (2005). A high-throughput  
761 gene-silencing system for the functional assessment of defense-related genes in  
762 barley epidermal cells. *Mol. Plant Microbe Interact.* **18**, 755-761.



763

764 **Edgar, C.** (2004). MUSCLE: multiple sequence alignment with high accuracy and high  
765 throughput. *Nucleic Acids Res.* **32**, 1792-1797.

766

767 **Engelhardt, S., Stam, R. and Hückelhoven, R.** (2018). Good riddance? Breaking  
768 disease susceptibility in the era of new breeding technologies. *Agronomy* **8**, 114.

769

770 **Feiguelman, G., Fu, Y. and Yalovsky, S.** (2018). ROP GTPases structure-function  
771 and signaling pathways. *Plant Physiol.* **176**, 57-79.

772

773 **Frantzeskakis, L., Kracher, B., Kusch, S., Yoshikawa-Maekawa, M., Bauer, S.,**  
774 **Pedersen, C., Spanu, P.D., Maekawa, T., Schulze-Lefert, P. and Panstruga, R.**  
775 (2018). Signatures of host specialisation and a recent transposable element burst in  
776 the dynamic one-speed genome of the fungal barley powdery pathogen. *BMC*  
777 *Genomics* **19**, 381.

778

779 **Fu, Y., Gu, Y., Zheng, Z., Wasteneys, G. and Yang, Z.** (2005). *Arabidopsis*  
780 interdigitating cell growth requires two antagonistic pathways with opposing action on  
781 cell morphogenesis. *Cell* **120**, 687-700.

782

783 **Fu, Y., Xu, T., Zhu, L., Wen, M. and Yang, Z.** (2009). A ROP GTPase signaling  
784 pathway controls cortical microtubule ordering and cell expansion in *Arabidopsis*. *Curr.*  
785 *Biol.* **19**, 1827-1832.

786

787 **Good, M.C., Zalatan, J.G. and Lim, W.A.** (2011). Scaffold proteins: Hubs for  
788 controlling the flow of cellular information. *Science* **332**, 680-686.

789

790 **Gu, Y., Fu, Y., Dowd, P., Li, S., Vernoud, V., Gilroy, S. and Yang, Z.** (2005). A Rho  
791 family GTPase controls actin dynamics and tip growth via two counteracting  
792 downstream pathways in pollen tubes. *J. Cell Biol.* **169**, 127-138.

793

794 **Gu, Y., Li, S., Lord, E.M. and Yang, Z.** (2006). Members of a novel class of  
795 Arabidopsis Rho guanine nucleotide exchange factors control Rho GTPase-dependent  
796 polar growth. *Plant Cell* **18**, 366-381.

797

798 **Hahn, M. and Mendgen, K.** (2001). Signal and nutrient exchange at biotrophic plant-  
799 fungus interfaces. *Curr. Opin. Plant Biol.* **4**, 322-327.

800

801 **Han, X. and Kahmann, R.** (2019). Manipulation of phytohormone pathways by  
802 effectors of filamentous pathogens. *Front. Plant Sci.* **10**, 822.

803

804 **Hazak, O., Bloch, D., Poraty, L., Sternberg, H., Zhang, J., Friml, J. and Yalovsky,**  
805 **S.** (2010). A rho scaffold integrates the secretory system with feedback mechanisms  
806 in regulation of auxin distribution. *PLoS Biol.* **8**, e1000282.

807

808 **He, Q., Naqvi, S., McLellan, H., Boevink, P.C., Champouret, N., Hein, I. and Birch,**  
809 **P.R.J.** (2018). Plant pathogen effector utilizes host susceptibility factor NLR1 to  
810 degrade the immune regulator SWAP70. *Proc. Natl. Acad. Sci. USA* **115**, E7834-  
811 E7843.

812

813 **Higaki, T., Takigawa-Imamura, H., Akita, K., Kutsuna, N., Kobayashi, R.,**  
814 **Hasezawa, S. and Miura, T.** (2017). Exogenous cellulase switches cell interdigitation  
815 to cell elongation in an RIC1-dependent manner in *Arabidopsis thaliana* cotyledon  
816 pavement cells. *Plant Cell Physiol.* **58**, 106-119.

817

818 **Hoefle, C., Huesmann, C., Schultheiss, H., Börnke, F., Hensel, G., Kumlehn, J.**  
819 **and Hückelhoven, R.** (2011). A barley ROP GTPase ACTIVATING PROTEIN  
820 associates with microtubules and regulates entry of the barley powdery mildew fungus  
821 into leaf epidermal cells. *Plant Cell* **23**, 2422-2439.

822

823 **Hong, D., Jeon, B.W., Kim, S.Y., Hwang, J.-U. and Lee, Y.** (2016). The ROP2-RIC7  
824 pathway negatively regulates light-induced stomatal opening by inhibiting exocyst  
825 subunit Exo70B1 in Arabidopsis. *New Phytol.* **209**, 624-635.

826

827 **Huesmann, C., Reiner, T., Hoefle, C., Preuss, J., Jurca, M.E., Domoki, M., Feher,**  
828 **A. and Hückelhoven, R.** (2012). Barley ROP binding kinase 1 is involved in  
829 microtubule organization and in basal penetration resistance to the barley powdery  
830 mildew fungus. *Plant Physiol.* **159**, 311-320.

831

832 **Hückelhoven, R. and Panstruga, R.** (2011). Cell biology of the plant-powdery mildew  
833 interaction. *Curr. Opin. Plant Biol.* **14**, 738-746.

834

835 **Jørgensen, J.H. and Wolfe, M.** (1994). Genetics of powdery mildew resistance in  
836 barley. *Crit. Rev. Plant Sci.* **13**, 97-119.

837

838 **McKeen, W.E. and Rimmer, S.R.** (1973). Initial penetration process in powdery  
839 mildew infection of susceptible barley leaves. *Phytopathology* **63**, 1049-1053.

840

841 **Kawano, Y., Akamatsu, A., Hayashi, K., Housen, Y., Okuda, J., Yao, A.,**  
842 **Nakashima, A., Takahashi, H., Yoshida, H., Wong, H.L., Kawasaki, T. and**  
843 **Shimamoto, K.** (2010). Activation of a Rac GTPase by the NLR family disease  
844 resistance protein Pit plays a critical role in rice innate immunity. *Cell Host Microbe* **7**,  
845 362-375.

846

847 **Kawano, Y., Fujiwara, T., Yao, A., Housen, Y., Hayashi, K. and Shimamoto, K.**  
848 (2014). Palmitoylation-dependent membrane localisation of the rice resistance protein  
849 Pit is critical for the activation of the small GTPase OsRac1. *J. Biol. Chem.* **289**, 19079-  
850 19088.

851

852 **Klahre, U., Becker, C., Schmitt, A.C. and Kost, B.** (2006). Nt-RhoGDI2 regulates  
853 Rac/Rop signaling and polar cell growth in tobacco pollen tubes. *Plant J.* **46**, 1018-  
854 1031.

855

856 **Koh, S., Andre, A., Edwards, H., Ehrhardt, D. and Somerville, S.** (2005).  
857 *Arabidopsis thaliana* subcellular responses to compatible *Erysiphe cichoracearum*  
858 infections. *Plant J.* **44**, 516-529.

859

860 **Kushnirov, V.V.** (2000). Rapid and reliable protein extraction from yeast. *Yeast* **16**,  
861 857-860.

862

863 **Lavy, M., Bloch, D., Hazak, O., Gutman, I., Poraty, L., Sorek, N., Sternberg, H. and**  
864 **Yalovsky, S.** (2007). A novel ROP/RAC effector links cell polarity, root-meristem  
865 maintenance, and vesicle trafficking. *Curr. Biol.* **17**, 947-952.

866

867 **Lee, Y.J., Szumlanski, A., Nielsen, E. and Yang, Z.** (2008). Rho-GTPase-dependent  
868 filamentous actin dynamics coordinate vesicle targeting and exocytosis during tip  
869 growth. *J. Cell. Biol.* **181**, 1155-1168.

870

871 **Li, B. and Fields, S.** (1993). Identification of mutations in p53 that affect its binding to  
872 SV40 large T antigen by using the yeast two-hybrid system. *FASEB J.* **7**, 957-963.

873

874 **Li, C., Lu, H., Li, W., Yuan, M. and Fu, Y.** (2017). A ROP2-RIC1 pathway fine-tunes  
875 microtubule reorganization for salt tolerance in *Arabidopsis*. *Plant, Cell Environ.* **40**,  
876 1127-1142.

877

878 **Lin, D., Cao, L., Zhou, Z., Zhu, L., Ehrhardt, D., Yang, Z. and Fu, Y.** (2013). Rho  
879 GTPase signaling activates microtubule severing to promote microtubule ordering in  
880 *Arabidopsis*. *Curr. Biol.* **23**, 290-297.

881

882 **McCollum, C., Engelhardt, S. and Hückelhoven, R.** (2019): ROP INTERACTIVE  
883 PARTNER b interacts with the ROP GTPase RACB and supports fungal penetration  
884 into barley epidermal cells. bioRxiv 750265.

885

886 **Meller, N., Merlot, S. and Guda, C.** (2005). CZH proteins: a new family of Rho-GEFs.  
887 *J. Cell. Sci.* **118**, 4937-4946.

888

889 **Miklis, M., Consonni, C., Bhat, R.A., Lipka, V., Schulze-Lefert, P. and Panstruga,**  
890 **R.** (2007). Barley MLO modulates actin-dependent and actin-independent antifungal  
891 defense pathways at the cell periphery. *Plant Physiol.* **144**, 1132-1143.

892

893 **Mucha, E., Hoefle, C., Hückelhoven, R. and Berken, A.** (2010). RIP3 and AtKinesin-  
894 13A – a novel interaction linking Rho proteins of plants to microtubules. *Eur. J. Cell*  
895 *Biol.* **89**, 906-916.

896

897 **Nibau, C., Wu, H.M. and Cheung, A.Y.** (2006). RAC/ROP GTPases: ‚hubs‘ for signal  
898 integration and diversification in plants. *Trends Plant Sci.* **11**, 309-315.

899

900 **Nottensteiner, M., Zechmann, B., McCollum, C., Hückelhoven, R.** (2018). A Barley  
901 powdery mildew fungus non-autonomous retrotransposon encodes a peptide that  
902 supports penetration success on barley. *J. Exp. Bot.* **69**, 3745-3758.

903 **Opalski, K.S., Schultheiss, H., Kogel, K.H. and Hüchelhoven, R.** (2005). The  
904 receptor-like MLO protein and the RAC/ROP family G-protein RACB modulate actin  
905 reorganization in barley attacked by the biotrophic powdery mildew fungus *Blumeria*  
906 *graminis* f.sp. *hordei*. Plant J. **41**, 291-303.

907

908 **Ostertag, M., Stammler, J., Douchkov, D., Eichmann, R. and Hüchelhoven, R.**  
909 (2013). The conserved oligomeric Golgi complex is involved in penetration resistance  
910 of barley to the barley powdery mildew fungus. Mol. Plant Pathol. **14**, 230-240.

911

912 **Panstruga, R. and Dodds, P.N.** (2009). Terrific protein traffic: The mystery of effector  
913 protein delivery by filamentous plant pathogens. Science **324**, 748-750.

914

915 **Platre, M.P. et al.** (2019). Developmental control of plant Rho GTPase nano-  
916 organization by the lipid phosphatidylserine. Science **364**, 57-62.

917

918 **Reiner, T., Hoefle, C. and Hüchelhoven, R.** (2016). A barley SKP1-like protein  
919 controls abundance of the susceptibility factor RACB and influences the interaction of  
920 barley with the barley powdery mildew fungus. Mol. Plant Pathol. **17**, 184-195.

921

922 **Ren, H., Dang, X., Cai, X., Yu, P., Li, Y., Zhang, S., Liu, M., Chen, B. and Lin, D.**  
923 (2017). Spatio-temporal orientation of microtubules controls conical cell shape in  
924 *Arabidopsis thaliana* petals. PLoS Genet. **13**, e1006851.

925

926 **Schaefer, A., Höhner, K., Berken, A. and Wittinghofer, A.** (2011). The unique plant  
927 RhoGAPs are dimeric and contain a CRIB motif required for affinity and specificity  
928 towards cognate small G proteins. Biopolymers **95**, 420-433.

929



930 **Scheler, B., Schnepf, V., Galgenmüller, C., Ranf, S. and Hückelhoven, R. (2016).**  
931 Barley disease susceptibility factor RACB acts in epidermal cell polarity and positioning  
932 of the nucleus. *J. Exp. Bot.* **67**, 3263-3275.

933

934 **Schnepf, V., Vlot, C.A., Kugler, K. and Hückelhoven, R. (2018).** Barley susceptibility  
935 factor RACB modulates transcript levels of signalling protein genes in compatible  
936 interactions with *Blumeria graminis* f.sp. *hordei*. *Mol. Plant Pathol.* **19**, 393-404.

937

938 **Schultheiss, H., Dechert, C., Kogel, K.-H. and Hückelhoven R. (2002).** A small  
939 GTP-binding host protein is required for entry of powdery mildew fungus into epidermal  
940 cells of barley. *Plant Physiol.* **128**, 1447-1454.

941

942 **Schultheiss, H., Dechert, C., Kogel, K.-H. and Hückelhoven, R. (2003).** Functional  
943 analysis of barley RAC/ROP G-protein family members in susceptibility to the powdery  
944 mildew fungus. *Plant J.* **36**, 589-601.

945

946 **Schultheiss, H., Preuss, J., Pircher, T., Eichmann, R. and Hückelhoven, R. (2008).**  
947 Barley RIC171 interacts with RACB *in planta* and supports entry of the powdery mildew  
948 fungus. *Cell. Microbiol.* **10**, 1815-1826.

949

950 **Schulze-Lefert, P. and Vogel, J. (2000).** Closing the ranks to attack by powdery  
951 mildew. *Trends in Plant Science* **5**, 343-348.

952

953 **Schweizer, P., Christoffel, A. and Dudler, R. (1999).** Transient expression of  
954 members of the germin-like gene family in epidermal cells of wheat confers disease  
955 resistance. *Plant J.* **20**, 541-552.

956

957 **Spanu, P.D. et al. (2010).** Genome expansion and gene loss in powdery mildew fungi  
958 reveal tradeoffs in extreme parasitism. *Science* **330**, 1543-1546.

959

960 **Stukenbrock, E.H., McDonald, B.A.** (2009) Population genetics of fungal and  
961 oomycete effectors involved in gene-for-gene interactions. *Mol Plant Microbe Interact.*  
962 *22*, 371-380.

963

964 **Sugiyama, Y., Nagashima, Y., Wakazaki, M., Sato, M., Toyooka, K., Fukuda, H.**  
965 **and Oda, Y.** (2019). A Rho-actin signaling pathway shapes cell wall boundaries in  
966 *Arabidopsis* xylem vessels. *Nat. Commun.* **10**, 468.

967

968 **Vickers, C.E., Xue, G.P. and Gresshoff, P.M.** (2003). A synthetic xylanase as a novel  
969 reporter in plants. *Plant Cell Rep.* **22**, 135-140.

970

971 **Voegelé, R.T., Struck, C., Hahn, M. and Mendgen, K.** (2001). The role of haustoria  
972 in sugar supply during infection of broad bean by the rust fungus *Uromyces fabae*.  
973 *Proc. Natl. Acad. Sci. USA* **98**, 8133-8138.

974

975 **Waadt, R., Schmidt, L.K., Lohse, M., Hashimoto, K., Bock, R. and Kudla, J.** (2008).  
976 Multicolor bimolecular fluorescence complementation reveals simultaneous formation  
977 of alternative CBL/CIPK complexes *in planta*. *Plant J.* **56**, 505-516.

978

979 **Walter, M., Chaban, C., Schütze, K., Batistic, O., Weckermann, K., Näke, C.,**  
980 **Blazevich, D., Grefen, C., Schumacher, K., Oecking, C., Harter, K. and Kudla, J.**  
981 (2004). Visualization of protein interactions in living plant cells using bimolecular  
982 fluorescence complementation. *Plant J.* **40**, 428-438.

983

984 **Wang, Q., Li, Y., Ishikawa, K., Kosami, K.I., Uno, K., Nagawa, S., Tan, L., Du, J.,**  
985 **Shimamoto, K. and Kawano, Y.** (2018). Resistance protein Pit interacts with the GEF  
986 OsSPK1 to activate OsRac1 and trigger rice immunity. *Proc. Natl. Acad. Sci. USA* **115**,  
987 E11551-E11560.

988

989 **Wicker, T. et al.** (2013). The wheat powdery mildew genome shows the unique  
990 evolution of an obligate biotroph. *Nat. Genet.* **45**, 1092-1096.

991

992 **Wu, G., Gu, Y., Li, S. and Yang, Z.** (2001). A genome-wide analysis of Arabidopsis  
993 Rop-interactive CRIB motif-containing proteins that act as ROP GTPase targets. *Plant*  
994 *Cell* **13**, 2841-2856.

995

996 **Wu, H., Hazak, O., Cheung, A.Y. and Yalovsky, S.** (2011). RAC/ROP GTPases and  
997 auxin signaling. *Plant Cell* **23**, 1208-1218.

998

999 **Yalovsky, S.** (2015). Protein lipid modifications and the regulation of ROP GTPase  
1000 function. *J. Exp. Bot.* **66**, 1617-1624.

1001

1002 **Yalovsky, S., Bloch, D., Sorek, N. and Kost, B.** (2008). Regulation of membrane  
1003 trafficking, cytoskeleton dynamics, and cell polarity by ROP/RAC GTPases. *Plant*  
1004 *Physiol.* **147**, 1527-1543.

1005

1006 **Yamaguchi, K. and Kawasaki, T.** (2012). Function of Arabidopsis SWAP70 GEF in  
1007 immune response. *Plant Signal Behav.* **7**, 465-468.

1008

1009 **Yamaguchi, K., Imai, K., Akamatsu, A., Mihashi, M., Hayashi, N., Shimamoto, K.**  
1010 **and Kawasaki, T.** (2012). SWAP70 functions as a Rac/Rop guanine nucleotide-  
1011 exchange factor in rice. *Plant J.* **70**, 389-397.

1012

1013 **Zeke, A., Lukacs, M., Lim, W.A. and Remenyi, A.** (2009). Scaffolds: interaction  
1014 platforms for cellular signalling circuits. *Trends Cell Biol.* **19**, 364-374.

1015

1016 **Zhang, Y., Xiong, Y., Liu, R., Xue, H.W. and Yang, Z.** (2019). The Rho-family  
1017 GTPase *OsRAC1* controls rice grain size and yield by regulating cell division. Proc.  
1018 Natl. Acad. Sci. USA **116**, 16121-16126.

1019

1020 **Zhou, Z., Shi, H., Chen, B., Zhang, R., Huang, S. and Fu, Y.** (2015). Arabidopsis  
1021 RIC1 severs actin filaments at the apex to regulate pollen tube growth. Plant Cell **27**,  
1022 1140-1161.

1023

1024 **Zhou, Z., Pang, Z., Zhao, S., Zhang, L., Lv, Q., Yin, D., Li, D., Xue, L., Zhao, X., Li,**  
1025 **X., Wang, W. and Zhu, L.** (2019). Importance of *OsRAC1* and *RAI1* in signalling of  
1026 nucleotide-binding site leucine-rich repeat protein-mediated resistance to rice blast  
1027 disease. New Phytol. **223**, 828-838.

1028

1029

1030 **Figures**

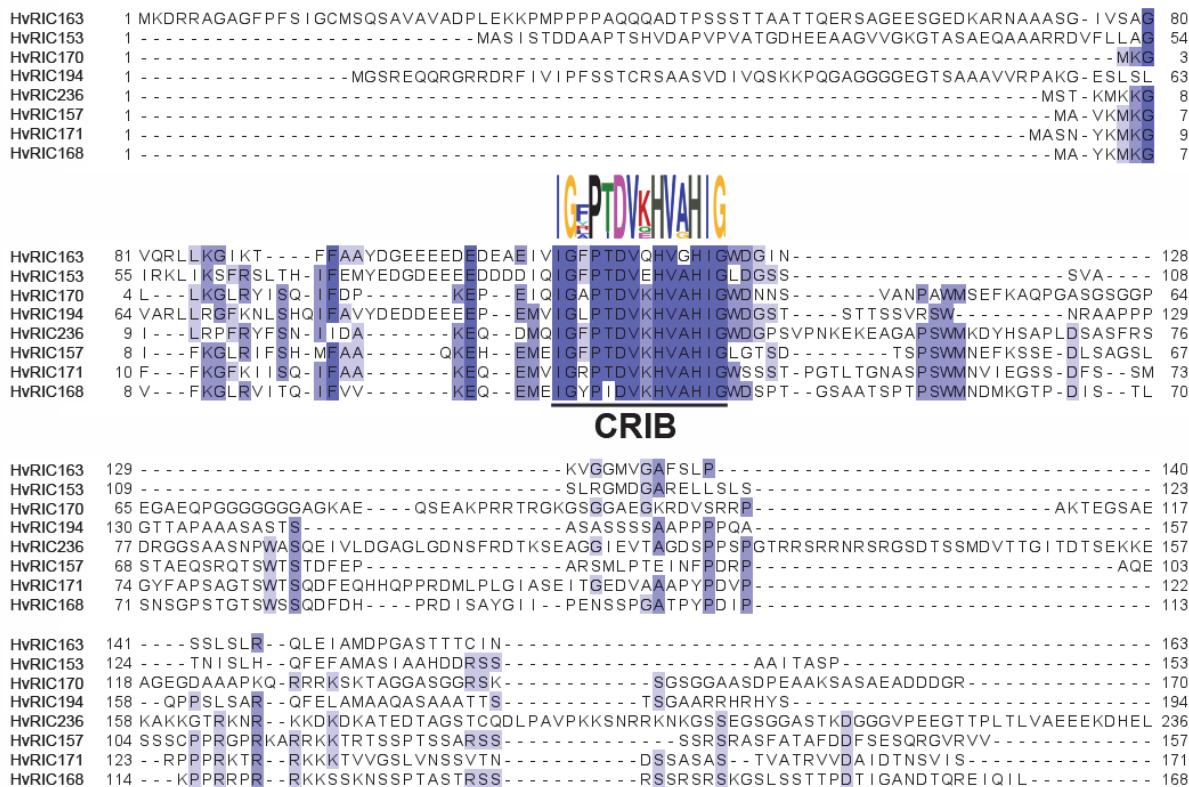

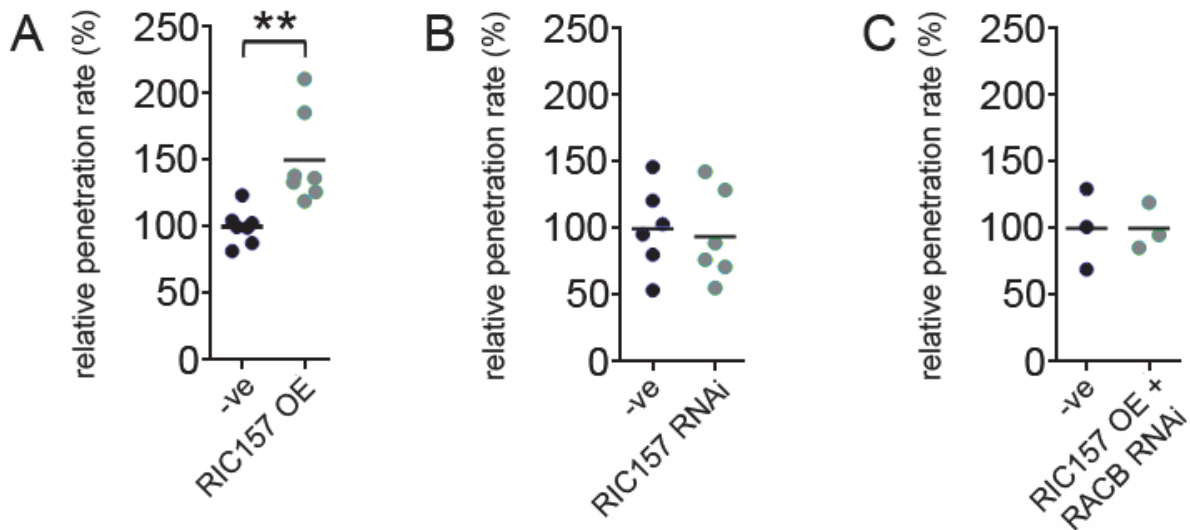

1040

1041 **Figure 2: RIC157 increases susceptibility in a RACB-dependent manner.**

1042 Epidermal cells of 7 day old primary barley leaves were transiently transformed by  
1043 particle bombardment with either (A) an overexpression construct of RIC157, (B) a  
1044 RNA interference construct of RIC157 or (C) simultaneously with an overexpression  
1045 construct of RIC157 and a RNA interference construct of RACB. Empty overexpression  
1046 or RNA interference plasmids were used as controls (-ve). The penetration efficiency  
1047 of *Bgh* into transformed barley epidermal cells was analysed 48 after inoculation with  
1048 fungal spores. Values are shown as mean of at least 3 independent biological  
1049 replicates, relative to the mean of the control set as 100%. \*\* indicates significance  $P$   
1050  $< 0.01$ , Student's t-test.

1051



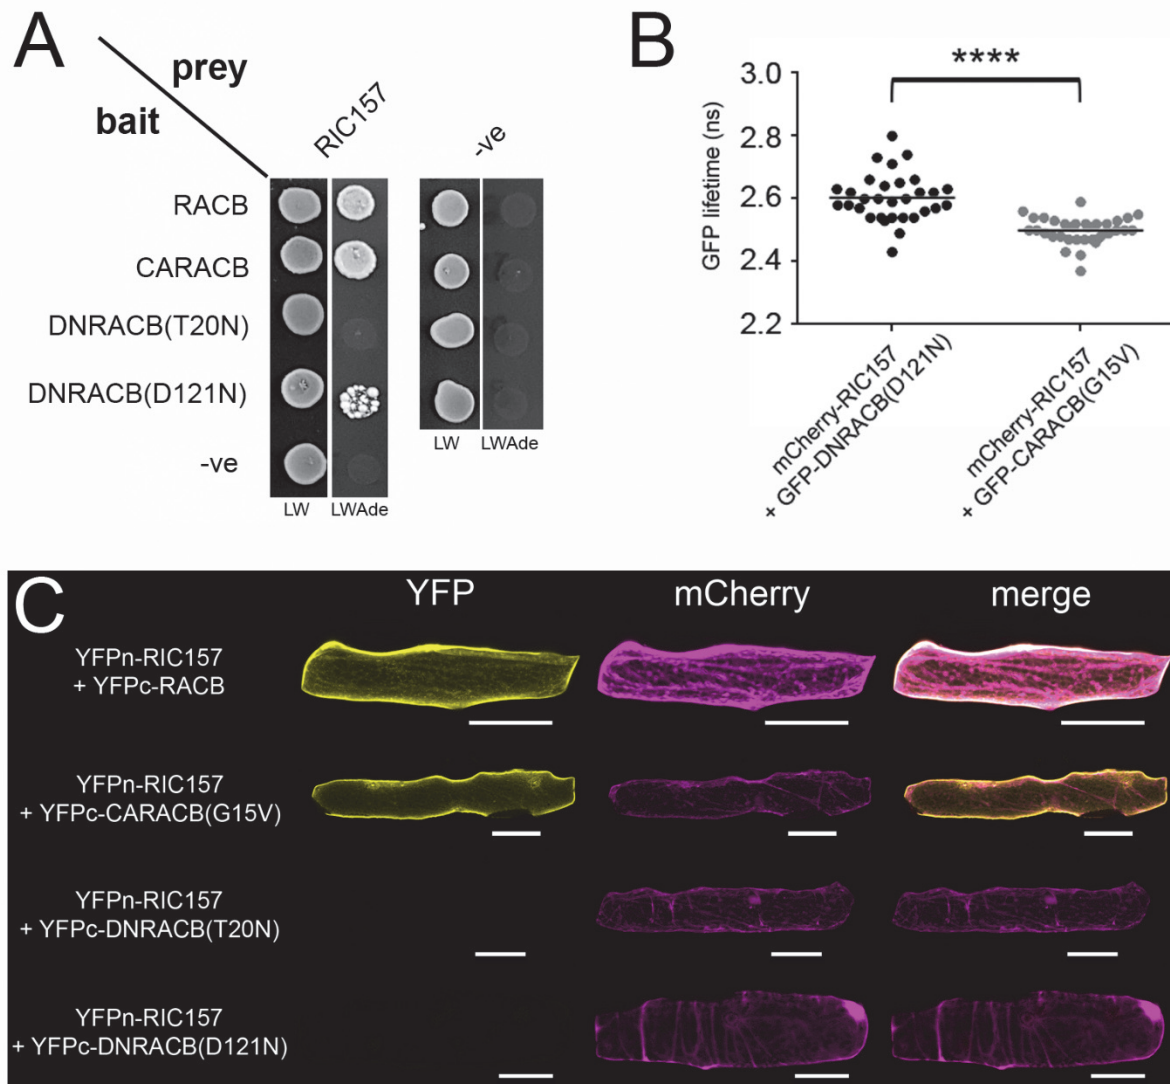

1052

1053 **Figure 3: RIC157 interacts directly with RACB in yeast and in planta.** A) Yeast-2-

1054 Hybrid indicates direct interaction between RIC157 and RACB in yeast. Yeast strain

1055 AH109 was transformed with indicated bait and prey fusion constructs. Overnight

1056 cultures of yeast transformants were dropped onto Complete Supplement Medium

1057 plates either lacking leucine and tryptophan (LW) or lacking leucine, tryptophan and

1058 adenine (LWAde) and incubated at 30°C. Growth on LWAde medium indicates

1059 interaction between bait and prey fusion proteins. -ve denotes empty prey and bait

1060 plasmid. Photos were taken 2 days (LW) and 7 days (LWAde), respectively, after

1061 dropping. B) Quantification of FLIM analysis confirms direct protein-protein interaction

1062 between RIC157 and activated RACB *in planta*. GFP lifetime in barley epidermal cells

1063 transiently co-expressing indicated constructs was investigated at the aequatorial

1064 plane 2d after transformation via particle bombardment. Graph shows result of 3

1065 independent biological replicates. \*\*\*\* indicates significance  $P < 10^{-4}$ , Student's t-test.

1066 C) BiFC shows close proximity between RIC157 and RACB *in planta*. Barley epidermal

1067 cells transiently co-expressing split-YFP fusion protein combinations and mCherry as  
1068 cytosolic transformation marker after particle bombardment transformation. 2d after  
1069 transformation, YFP fluorescence reconstitution was analysed via Confocal laser  
1070 scanning microscopy. Shown are maximum projections of at least 15 optical sections  
1071 taken at 2 $\mu$ m increments. Bars = 50 $\mu$ m.  
1072

1073

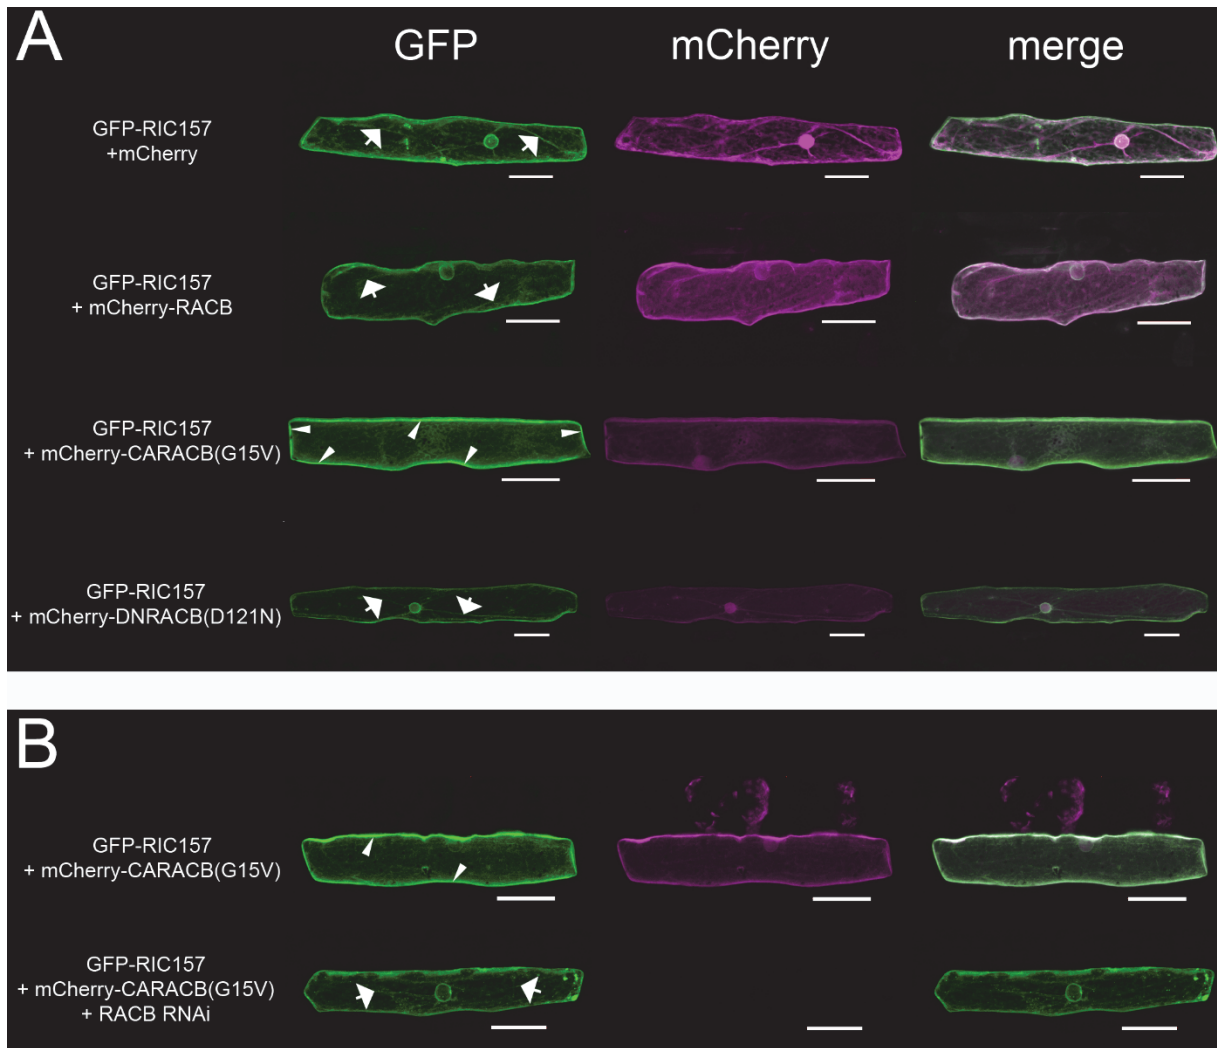

1074

1075 **Figure 4: RIC157 localisation is affected by RACB-activation status.** Confocal  
1076 scanning microscopy of barley epidermal cells 1d after transformation via particle  
1077 bombardment. A) GFP-RIC157 localises to the cytoplasm, but not the nucleus (upper  
1078 row) and is recruited to the cell periphery exclusively by mCherry-CARACB(G15V), but  
1079 not by mCherry-RACB or mCherry-DNRACB(D121N). B) Simultaneous RNA  
1080 interference-mediated silencing of RACB attenuates RIC157 recruitment to the cell  
1081 periphery. Arrows indicate cytoplasmic strands, arrow heads point towards GFP  
1082 fluorescence accumulation at cell periphery. Microscopy pictures show maximum  
1083 projections of at least 15 optical sections taken at 2 $\mu$ m increments. Bar = 50 $\mu$ m.

1084

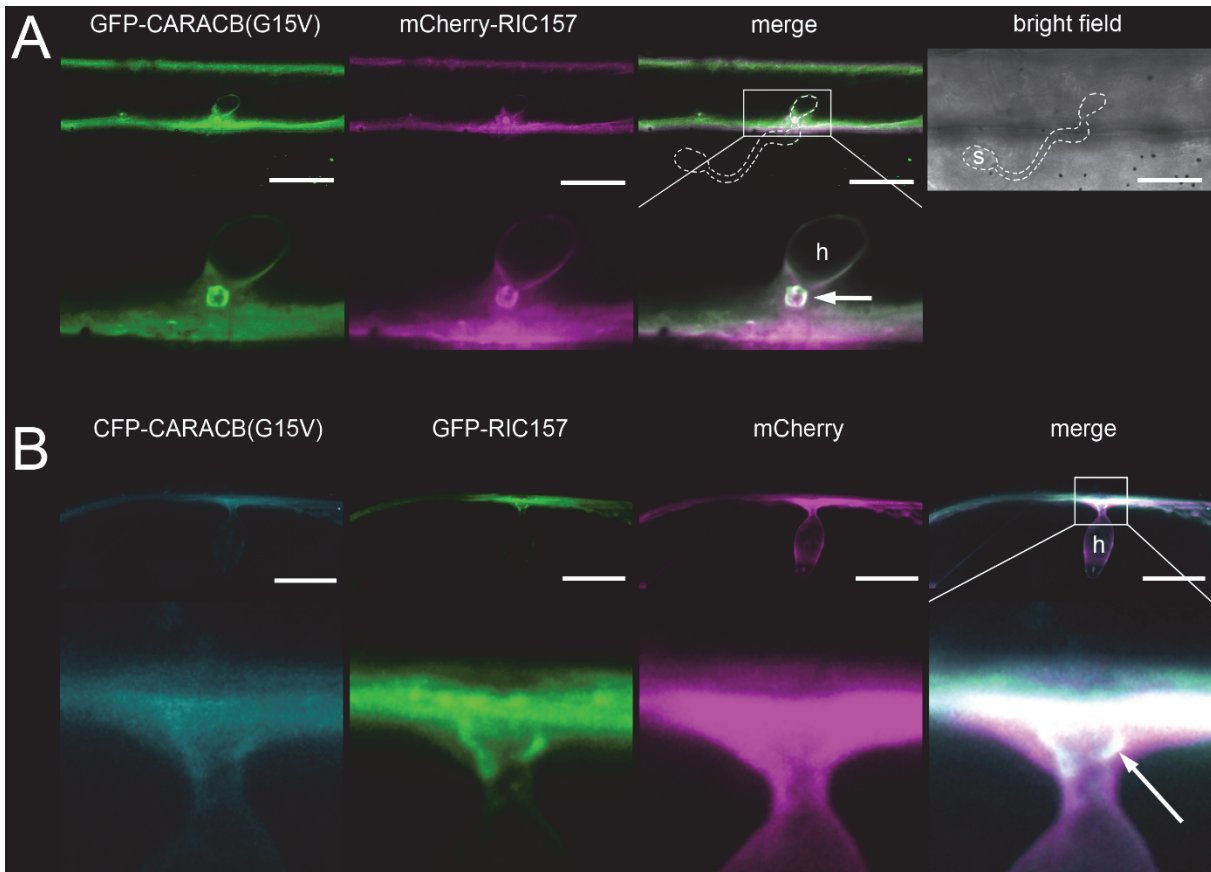

1085

1086

1087

1088

1089

1090

1091

1092

1093

1094

1095

1096

1097

1098

**Figure 5: RIC157 is recruited to penetration site where it colocalises with activated RACB.** Confocal laser scanning microscopy of epidermal cells 1d after transformation via particle bombardment and 18-24h after inoculation with *Bgh*. Cells in A) and B) show successful fungal penetration due to haustorium formation (h). A) Transient co-expression of GFP-CARACB(G15V) and mCherry-RIC157. Area in white square is enlarged in lower panel. S = spore; Bar = 30 $\mu$ m. B) Transient co-expression of CFP-CARACB(G15V) and GFP-RIC157. Cytosolic mCherry was expressed to distinguish RIC157 and CARACB(G15V) localisation from cytoplasm at penetration site. Bar = 20 $\mu$ m. Arrows indicate approximate position of the haustorial neck. Contrast of images was equally slightly enhanced. Arrows indicate haustorial neck close to fungal penetration site.

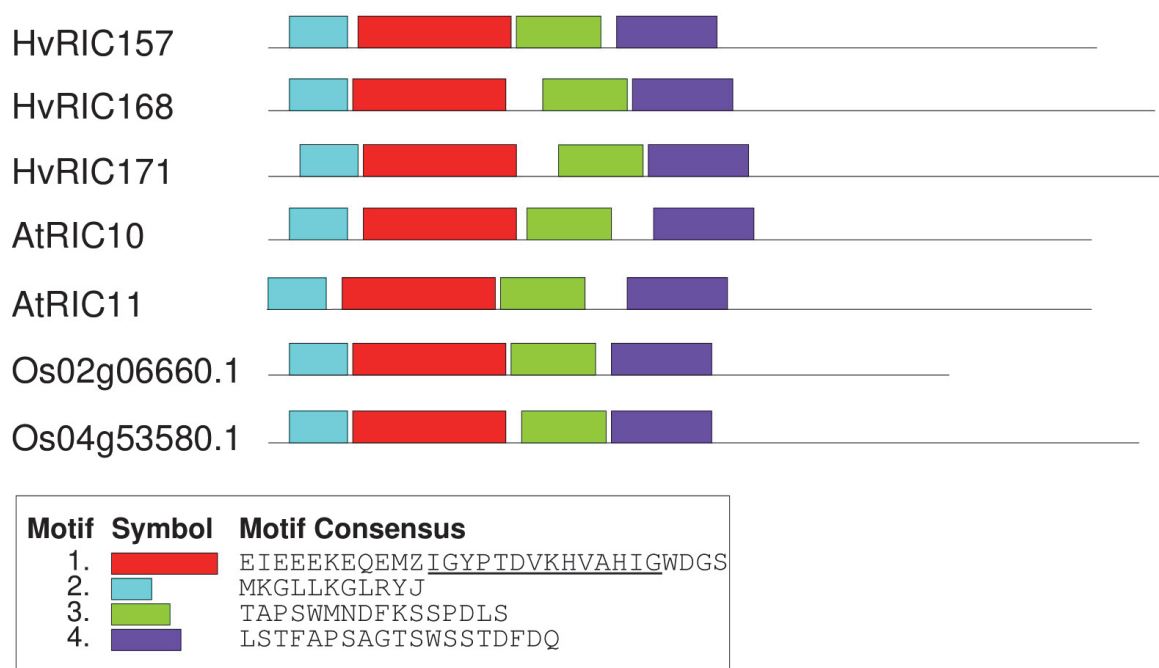

1099

1100 **Suppl. Fig. S1: Barley RIC157 shows limited sequence similarity to barley RIC168**

1101 **and RIC171, but also to RIC proteins from *Arabidopsis thaliana* and *Oryza sativa*.**

1102 Primary sequences of RIC proteins (schematically shown in top part of the figure) were

1103 analysed for domain homologies using MEME online software (<http://meme->

1104 [suite.org/tools/meme](http://meme-suite.org/tools/meme)). Consensus sequence of the four most similar motifs are shown

1105 below. Underlined sequence denotes CRIB domain. Hv = *Hordeum vulgare*, At =

1106 *Arabidopsis thaliana*, Os = *Oryza sativa*.

1107

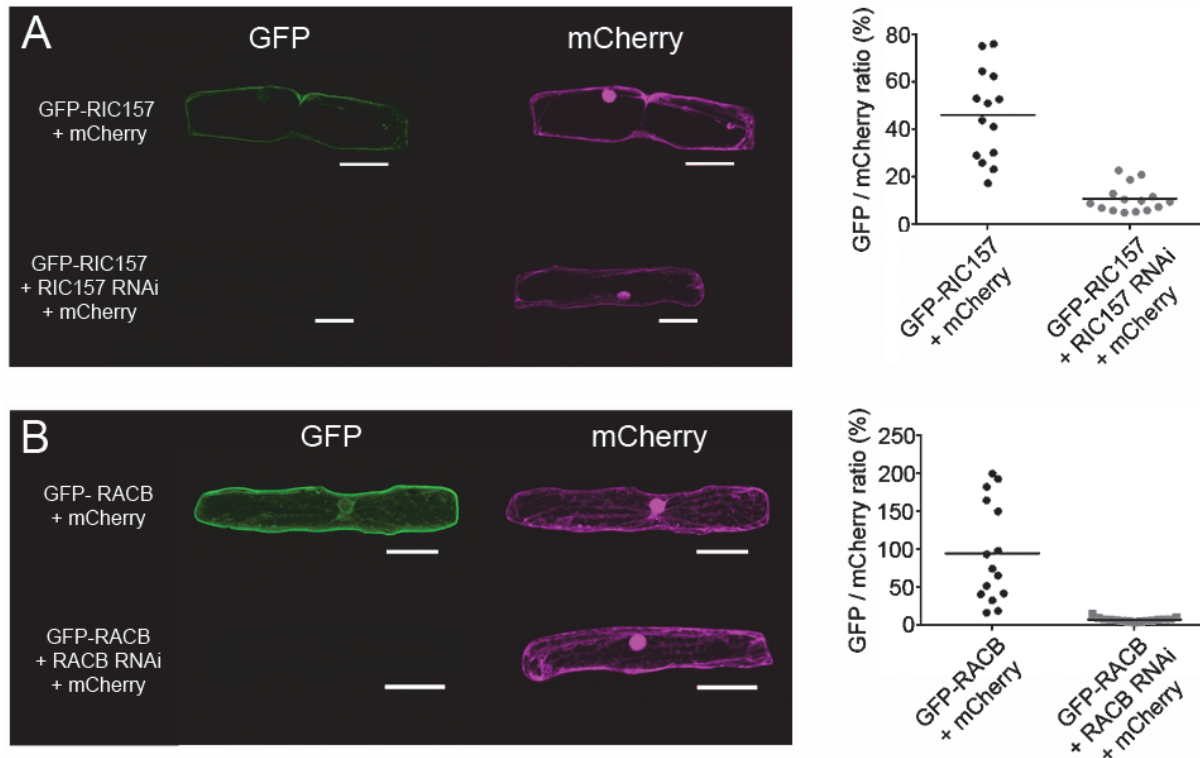

1108

1109 **Suppl. Fig. S2: RNA interference-mediated silencing efficiency.** Epidermal cells of  
1110 7d old barley primary leaves were transiently transformed via particle bombardment  
1111 with overexpression constructs of GFP fusions of RIC157 (A) and RACB (B) alone or  
1112 together with RNAi silencing constructs. A construct to express cytosolic mCherry was  
1113 simultaneously co-delivered for transformation efficiency and fluorescence  
1114 quantification purposes. Microscopy images are maximum projections of at least 15  
1115 optical sections taken at 2 $\mu$ m increments. Bars = 50 $\mu$ m. Each graph shows the mean  
1116 of GFP fluorescence as percentage of mCherry fluorescence per transformed cell  
1117 (whole cell area was taken as region of interest for measuring fluorescence intensity).  
1118 Dots represent single measured cells.

1119



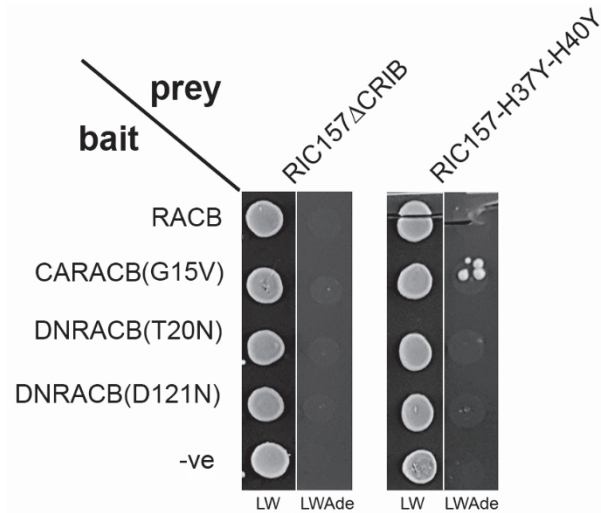

1120

1121 **Suppl. Fig. S3: CRIB deletion and CRIB mutation in RIC157 prevents interaction**  
1122 **with RACB in yeast.** Yeast strain AH109 was transformed with indicated bait and prey  
1123 fusion constructs. Overnight cultures of yeast transformants were dropped onto  
1124 Complete Supplement Medium plates either lacking leucine and tryptophan (LW) or  
1125 lacking leucine, tryptophan and adenin (LWAdE) and incubated at 30°C. Growth on  
1126 LWAdE medium indicates interaction between bait and prey fusion proteins. –ve  
1127 denotes empty prey and bait plasmid. Photos were taken 2 days (LW) and 7 days  
1128 (LWAdE), respectively, after dropping.

1129

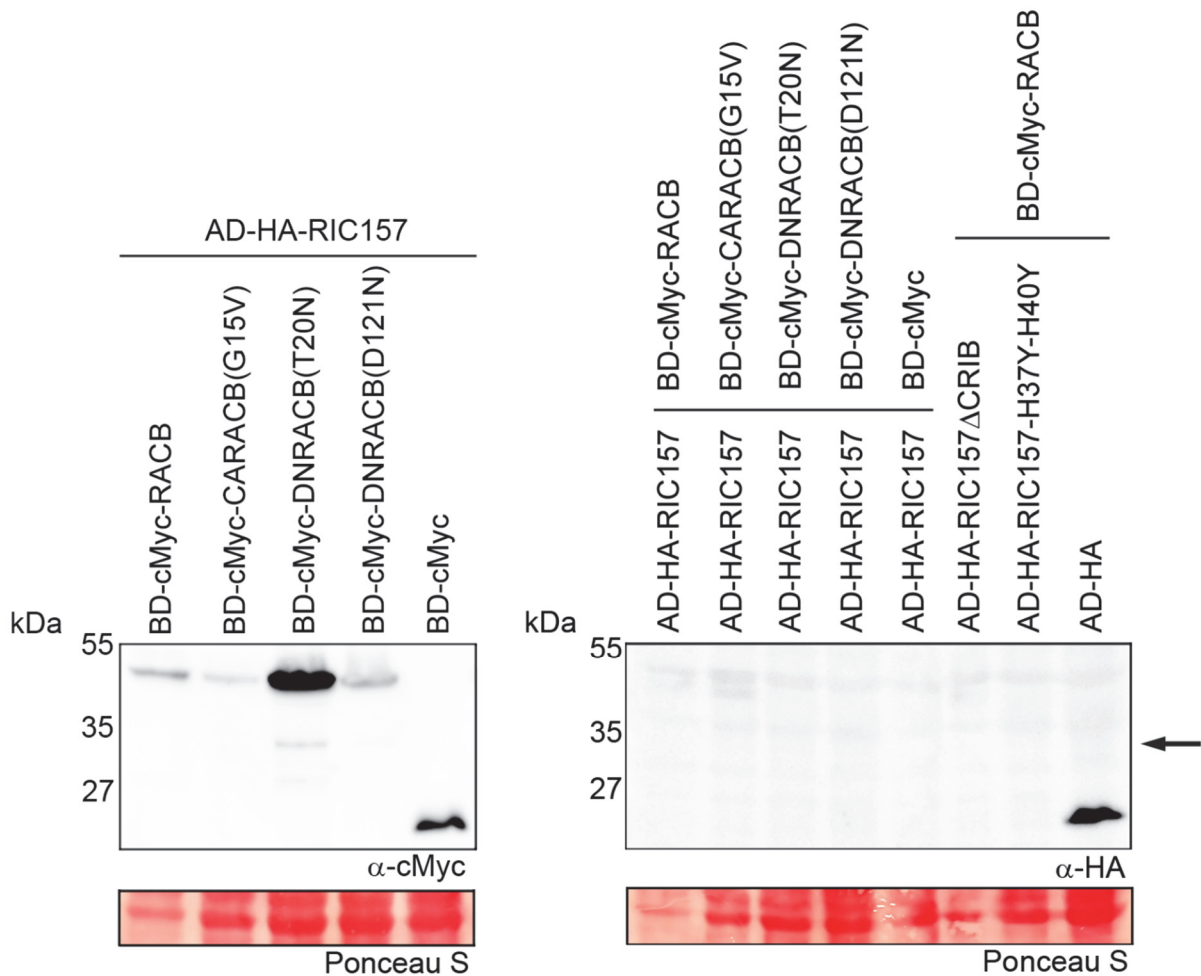

1130

1131 **Suppl. Fig. S4: Protein stability in yeast.** Immunoblots probed with  $\alpha$ -cMyc to detect  
 1132 RACB variants fused to GAL4 binding domain (BD; bait) encoded on pGBKT7 and  $\alpha$ -  
 1133 HA to detect RIC157 variants fused to GAL4 activation domain (AD; prey) encoded on  
 1134 pGADT7 after transformation of yeast strain AH109. Total yeast protein was extracted  
 1135 as described in Experimental Procedures. Molecular weight is indicated in kiloDalton  
 1136 (kDa). Ponceau S staining shows protein loading. Stable expression of RIC157  
 1137 variants fused to GAL4 activation domain could not be detected in immunoblots (arrow  
 1138 indicates expected bandsizes).

1139

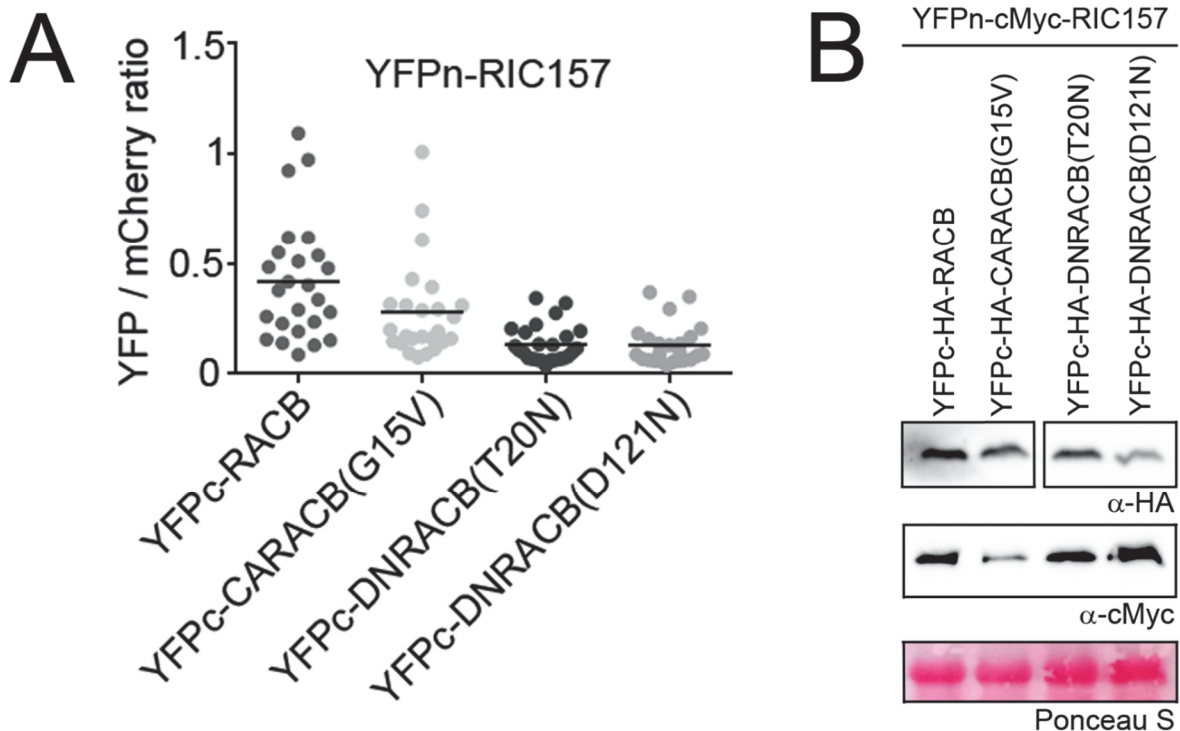

1140

1141 **Suppl. Figure S5: Ratiometric BiFC analyses and BiFC fusion protein stability.**

1142 A) Barley epidermal cells were transiently transformed with indicated constructs  
1143 encoding for BiFC fusion proteins. Cytosolic mCherry expression was used in each  
1144 sample as transformation marker and to quantify reconstituted YFP fluorescence  
1145 ratiometrically. The whole cell area was taken as region of interest. Graph shows the  
1146 mean of the YFP/mCherry fluorescence ratio, taken from at least 20 cells (shown as  
1147 dots. B) Barley mesophyll protoplasts were prepared and transformed with BiFC  
1148 constructs as described in Experimental procedures. To confirm stable *in planta*  
1149 expression, immunoblots were probed with  $\alpha$ -HA to detect YFPc-RACB fusion proteins  
1150 and  $\alpha$ -cMyc to detect YFPn-RIC157 fusion proteins. Ponceau S staining shows equal  
1151 protein loading.

1152

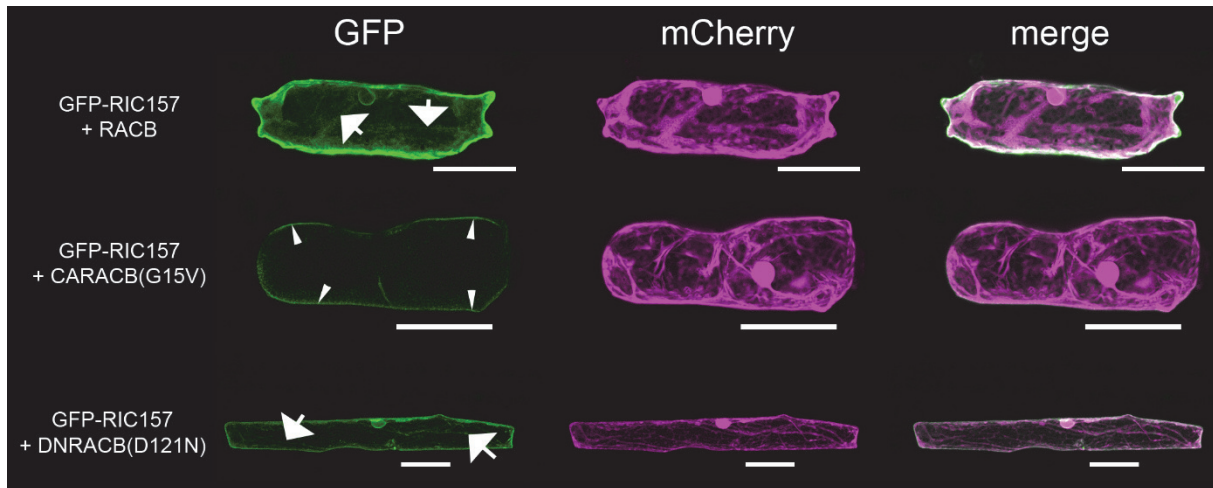

1153

1154 **Suppl. Fig. S6: RIC157 is recruited to the cell periphery by activated RACB.**

1155 Confocal laser scanning microscopy of barley epidermal cells 1d after transformation  
 1156 via particle bombardment. GFP-RIC157 localises to the cytoplasm, but not the nucleus  
 1157 and is recruited to the cell periphery exclusively by non-tagged CARACB(G15V), but  
 1158 not DNRACB(D121N). A construct for cytosolic mCherry expression was  
 1159 simultaneously used to check transformation efficiency. Arrows indicate cytoplasmic  
 1160 strands, arrow heads point towards GFP fluorescence accumulation at cell periphery.  
 1161 Microscopy pictures show maximum projections of at least 15 optical sections taken at  
 1162 2µm increments. Bar = 50µm.

1163

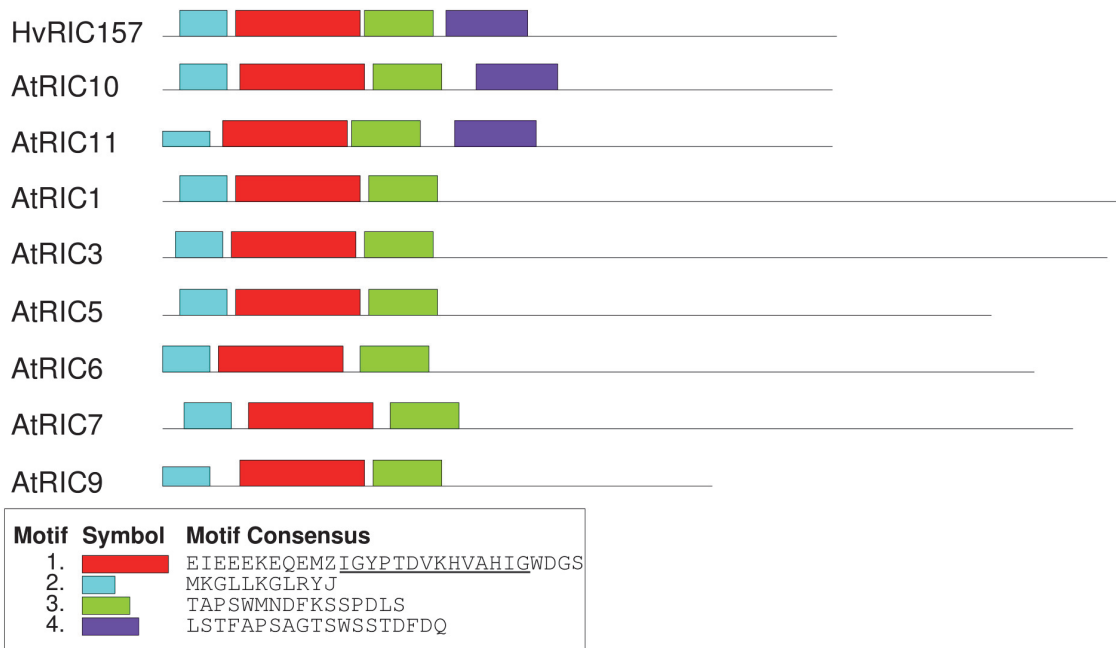

1164

1165 **Suppl. Fig. S7: Barley RIC157 shows limited sequence similarity to RIC proteins**  
 1166 **from *Arabidopsis thaliana*.** Primary sequences of RIC proteins (schematically shown

1167 in top part of the figure) were analysed for domain homologies using MEME online  
 1168 software (<http://meme-suite.org/tools/meme>). Consensus sequence of the four most  
 1169 similar motifs are shown below. Underlined sequence denotes CRIB domain. Hv =  
 1170 *Hordeum vulgare*, At = *Arabidopsis thaliana*.

1171

1172

| Primer name           | Gene (construct)      | Sequence                                                       |
|-----------------------|-----------------------|----------------------------------------------------------------|
| RIC157_GW_for         | <i>RIC157</i>         | 5'-AAAAAGCAGGCTCACAAATGGCGGTAAGATGAAGGG-3'                     |
| RIC157_GW_rev+STOP    | <i>RIC157</i>         | 5'-AGAAAGCTGGGTACCAGCCTCCGGATCAGACGACTCGAACCCCTCTTTGC-3'       |
| RIC157delCRIB_for     | <i>RIC157 Δ CRIB</i>  | 5'-GCTCAAAAGGAGCATGAGATGGAATGGGCACCAGTGACACATC-3'              |
| RIC157delCRIB_rev     | <i>RIC157 Δ CRIB</i>  | 5'-CACTGGTGCCCAATCCATCTCATGCTCCTTTGAGC-3'                      |
| CRIB157H37&40Y_for    | <i>RIC157-H37-40Y</i> | 5'-CCTACAGATGTAAGATATGTGGCTTACATAGGTTTGGGCACCAGTGACACATCTCC-3' |
| CRIB157H37&40Y_rev    | <i>RIC157-H37-40Y</i> | 5'-GGAGATGTGTCACTGGTGCCCAACCTATGTAAGCCACATACCTTACATCTGTAGG-3'  |
| attB1                 | <i>attB1</i>          | 5'-GGGGACAAGTTTGTACAAAAAAGCAGGCTCACAA-3'                       |
| attB2                 | <i>attB2</i>          | 5'-GGGGACCACCTTTGTACAAAGAAAGCTGGGTACCAG-3'                     |
| RIC157_RNAi_NotI_for  | <i>RIC157 RNAi</i>    | 5'-AATTGCGGCCGCAAGATGAAGGGAATCTTCAAAGGGC-3'                    |
| RIC157_RNAi_XbaI_rev  | <i>RIC157 RNAi</i>    | 5'-AATTTCTAGAACGCCGTCGCGAAGGAGGCCCTCGACC-3'                    |
| RIC157_RNAi_EcoRI_for | <i>RIC157 RNAi</i>    | 5'-AATTGAATCTTGGGCACCAGTGACACATCTCC-3'                         |
| RIC157_RNAi_EcoRI_rev | <i>RIC157 RNAi</i>    | 5'-AATTGAATCTTCCATCTCATGCTCCTTTTGGAGC-3'                       |
| RIC157_BamHI_for      | <i>RIC157</i>         | 5'-AATTGGATCCATGGCGGTAAGATGAAGGGAATC-3'                        |
| RIC157_KpnI_rev       | <i>RIC157</i>         | 5'-AATTGGTACCCTAGACGACTCGAACCCCTCTTGC-3'                       |
| RIC157_for            | <i>RIC157</i>         | 5'-ATGGCGGTAAGATGAAGG-3'                                       |
| RIC157_rev            | <i>RIC157</i>         | 5'-GACGACTCGAACCCCTCTTGC-3'                                    |
| RACB_D121N_fw         | <i>DNRACB(D121N)</i>  | 5'-CTCGTGGGAACAAAGCTTAATCTTCGAGATGACAAG-3'                     |
| RACB_D121N_rv         | <i>DNRACB(D121N)</i>  | 5'-CTTGTCATCTCGAAGATTAAGCTTTGTTCCACGAG-3'                      |
| RACB_GW_for           | <i>RACB</i>           | 5'-AAAAAGCAGGCTCACAAATGAGCGCTCCAGTTTCATAAAGTGC-3'              |
| RACB_GW_rev           | <i>RACB</i>           | 5'-AGAAAGCTGGGTACCAGCCTCCGGACAAGATGGAGCAAGCCCCC-3'             |
| delCSIL_for           | <i>RACB Δ CSIL</i>    | 5'-GAAGAAAAAGGCGCAGAGGGGGGCTTGATCCATCTTGATGTCGGAGCGGTG-3'      |
| delCSIL_rev           | <i>RACB Δ CSIL</i>    | 5'-CACCGCTCCGGACTACAAGATGGATCAAGCCCCCTCTGCGCCTTTTCTTC-3'       |
| GW_RfA_mCherry-F      | <i>mCherry</i>        | 5'-GCTGTACAAGATCACAAAGTTTGTACAAAAAAGCTG-3'                     |
| GW_RfA_meGFP-F        | <i>meGFP</i>          | 5'-GCTGTACAATAACAAAGTTTGTACAAAAAAGCTG-3'                       |
| GW_RfA_Xba-R          | <i>RfA</i>            | 5'-TGCTGCAGGTCGACTCTAGAATCACCACTTTGTACAAGAAAGCTG-3'            |
| GW_Xba_RfB-F          | <i>RfB</i>            | 5'-GGTACCCTGGGATCCTCTAGAATCAACAAGTTTGTACAAAAAAGCT-3'           |
| GW_RfB-R              | <i>RfB</i>            | 5'-TGCTCACCATATCAACCCTTTGTACAAGAAAGCT-3'                       |
| meGFP-STP-F           | <i>meGFP</i>          | 5'-AGTGGTTGATATGGTGAAGCAAGGGCGAGG-3'                           |
| mCherry-STP-F         | <i>mCherry</i>        | 5'-AGTGGTTGATATGGTGAAGCAAGGGCGAGG-3'                           |
| XFP-noSTP_Xba-F       | <i>XFP</i>            | 5'-GGTACCCTGGGATCCTCTAGAATGGTGAAGCAAGGGCGAGG-3'                |
| XFP-noSTP-R           | <i>XFP</i>            | 5'-AACTTGTGATCTTGTACAGCTCGTCCATGCC-3'                          |
| meGFP-noSTP-R         | <i>meGFP</i>          | 5'-AACTTGTGATTTTGTACAGCTCGTCCATGCC-3'                          |
| mCherry-STP_Xba-R     | <i>mCherry</i>        | 5'-TGCTGCAGGTCGACTCTAGATTACTTGTACAGCTCGTCCATGCC-3'             |
| meGFP-STP_Xba-R       | <i>meGFP</i>          | 5'-TGCTGCAGGTCGACTCTAGATTATTTGTACAGCTCGTCCATGCC-3'             |

1173

1174 **Suppl. Table 1: Primers used in this study**
