1 **Barley RIC157 is involved in RACB-mediated susceptibility to**  
2 **powdery mildew**

3 Stefan Engelhardt, Adriana Trutzenberg, Katja Probst, Johanna Hofer,  
4 Christopher McCollum, Michaela Kopischke, and Ralph Hückelhoven<sup>#</sup>  
5 Phytopathology, TUM School of Life Science Weihenstephan, Technical  
6 University of Munich, Emil-Ramann-Str.2, 85354 Freising, Germany

7 <sup>#</sup>Corresponding author: [hueckelhoven@wzw.tum.de](mailto:hueckelhoven@wzw.tum.de)

8

9 **Abstract**

10 Successful obligate pathogens benefit from host cellular processes. For the  
11 biotrophic ascomycete fungus *Blumeria graminis* f.sp. *hordei* (*Bgh*) it has been shown  
12 that barley RACB, a small monomeric G-protein (ROP, RHO of plants), is required for  
13 full susceptibility to fungal penetration. The susceptibility function of RACB probably  
14 lies in its role in cell polarisation, which may be co-opted by the pathogen for invasive  
15 ingrowth of its haustorium. However, the actual mechanism of how RACB supports  
16 the fungal penetration success is little understood. RIC proteins (ROP-Interactive and  
17 CRIB-(Cdc42/Rac Interactive Binding) motif-containing) are considered scaffold  
18 proteins which can interact directly with ROPs via a conserved CRIB motif. Here we  
19 describe a yet uncharacterised RIC protein, RIC157, which can interact directly with  
20 RACB *in planta*. We show that RIC157 undergoes a recruitment from the cytoplasm  
21 to the cell periphery in the presence of activated RACB. During fungal infection,  
22 RIC157 and activated RACB colocalise at the penetration site, particularly at the  
23 haustorial neck. In a RACB-dependent manner, transiently overexpressed RIC157  
24 renders barley epidermal cells more susceptible to fungal penetration. This suggests  
25 that RIC157 promotes fungal penetration into barley epidermal cells via its function  
26 downstream of RACB.

27

28 **Introduction**

29 Plants have developed a multilayered immunity to defend microbial invasion. This  
30 consists of pre-formed barriers and induced defences that base on the receptor-  
31 mediated recognition of microbe-derived and endogenous elicitors (Boller and Felix  
32 2009; Stukenbrock and McDonald 2009). Except for necrotrophs, invading microbes

33 rely to different extents on a living host to establish an infection. With the help of  
34 secreted effectors, pathogens undermine plant immune reactions and influence the  
35 host metabolism to render their micro-environment more favourable (Białas *et al.*,  
36 2018, Han and Kahmann 2019). The co-evolution between microbial effectors and  
37 their specific host target molecules can lead to an increase in host specialisation,  
38 symbiotic relationships thereby demonstrating extreme examples. Regarding  
39 pathogens, especially in genomes of cereal powdery mildew fungi it has been  
40 observed that the amount of genes encoding for metabolic enzymes is massively  
41 reduced, concomitantly with the proliferation of the putative effector gene pool and  
42 transposable elements (Spanu *et al.*, 2010, Wicker *et al.*, 2013, Frantzeskakis *et al.*,  
43 2018). Plant targets of these effectors are not necessarily involved in resistance  
44 mechanisms, but also in cellular processes that, when controlled by the pathogen,  
45 can support the susceptibility towards the invading pathogen. With the current  
46 possibilities to use a plethora of different breeding technologies, durable crop  
47 resistance based on the loss of these susceptibility gene product functions is within  
48 reach (Dangl *et al.* 2013, Engelhardt *et al.*, 2018).

49 Powdery mildew fungi infect a huge variety of monocot and dicot plants causing  
50 massive yield losses in crops. The ascomycete fungus *Blumeria graminis* f.sp. *hordei*  
51 (*Bgh*) is the specific causal agent of the agronomically important powdery mildew  
52 disease on barley (*Hordeum vulgare*) (Jørgensen and Wolfe 1994). As an obligate  
53 biotrophic parasite, *Bgh* requires living epidermal cells to complete its life cycle.  
54 Airborne conidia germinate on the leaf surface and form an appressorium to  
55 penetrate the cuticle and the cell wall with the help of an immense turgor pressure  
56 and the release of cell wall-degrading enzymes (McKeen and Rimmer 1973; Schulze-  
57 Lefert and Vogel 2000; Hückelhoven and Panstruga 2011). A successful fungal  
58 infection is characterised by the formation of a haustorium inside the host cell, which  
59 is essential for nutrient uptake and effector protein delivery (Hahn and Mendgen  
60 2001, Voegelé *et al.*, 2001, Panstruga and Dodds 2009). The haustorium is  
61 separated from the host cytosol by the extrahaustorial matrix and surrounded by the  
62 extrahaustorial membrane (EHM), which is continuous with the plant plasma  
63 membrane, but differs functionally and biochemically from it (Koh *et al.*, 2005, Inada  
64 and Ueda 2014, Kwaaitaal *et al.*, 2017). It is feasible to imagine a pathogen-triggered  
65 active contribution of the plant to accommodate the fungal haustorium.

66 ROPs (RHO (RAS homologue) of plants, or RACs, for rat sarcoma (RAS)-related C3  
67 botulinum toxin substrate) form a unique subfamily of small monomeric RHO  
68 GTPases in plants, since they do not fall into the phylogenetic RHO subclades of  
69 RAC, CDC42 and RHO GTPases found in yeast or animals (Brembu *et al.*, 2006). G-  
70 proteins are paradigms of molecular switches due to their ability to bind and  
71 hydrolyze GTP. The GTP-bound form represents the activated state, and a plasma  
72 membrane association of ROP-GTP via posttranslational lipid modifications is  
73 required for downstream signalling (Yalovsky 2015). Upon GTP hydrolysis, GDP-  
74 bound or nucleotide-free ROPs are inactive in downstream signalling. The cycling  
75 between activated and inactive state needs to be spatiotemporally controlled by  
76 regulatory partners. Guanine nucleotide exchange factors (GEFs) positively regulate  
77 ROP activity by facilitating the GDP/GTP exchange. In plants, three different sorts of  
78 ROP GEFs can be distinguished based on their particular GEF domain: PRONE  
79 (plant-specific Rop nucleotide exchanger), DHR2 (DOCK homology region 2, found in  
80 SPIKE1) and a less well characterized DH-PH domain (B-cell lymphoma homology-  
81 pleckstrin homology) described in a plant homolog of human SWAP70 (Berken *et al.*,  
82 2005, Meller *et al.*, 2005, Gu *et al.*, 2006, Basu *et al.*, 2008, Yamaguchi and  
83 Kawasaki 2012, Yamaguchi *et al.*, 2012, He *et al.*, 2018). The interaction of ROPs  
84 with a GTPase Activating Protein (GAP) enhances the intrinsic GTP hydrolysis  
85 activity, followed by ROP inactivation (Berken and Wittinghofer 2008). Beside their  
86 putative involvement in ROP recycling, Guanine nucleotide Dissociation Inhibitors  
87 (GDIs) bind and sequester inactive ROPs in the cytoplasm and are therefore  
88 considered negative regulators of ROP activity (Klahre *et al.*, 2006, Boulter and  
89 Garcia-Mata 2010). ROPs are involved in the regulation of a multitude of cellular  
90 processes. For instance, the cytoskeleton organisation and consequentially cell  
91 shape and function is subject to RHO-like GTPase control (Chen and Friml 2014). In  
92 *Arabidopsis thaliana* xylem vessels, AtROP11 signaling promotes cell wall apposition  
93 and shapes cell wall pit boundaries (Sugiyama *et al.*, 2019). Different ROPs are  
94 involved in polar cell growth and even function antagonistically during the generation  
95 of *Arabidopsis thaliana* pavement cells (Craddock *et al.*, 2012). Beside cell  
96 polarisation and cytoskeleton organisation, ROPs have been also implicated in  
97 membrane trafficking and auxin signaling (Yalovsky *et al.*, 2008, Wu *et al.*, 2011).  
98 OsRac1 from rice (*Oryza sativa* enhances cell division by regulating OsMAPK6,  
99 thereby promoting rice grain yield (Zhang *et al.*, 2019). OsRAC1 has also been

100 demonstrated to regulate immune-related processes like ROS production, defense  
101 gene expression and cell death. OsRac1 becomes activated by OsRacGEF1 upon  
102 receptor-mediated perception of fungal-derived chitin by OsCEBiP and OsCERK1  
103 (Akamatsu *et al.*, 2013). Chitin-perception might also lead to the activation of  
104 OsRAC1 by OsSWAP70 (Yamaguchi *et al.*, 2012). Downstream signaling by  
105 OsRAC1 is also triggered after recognition of pathogen effector proteins: Plasma  
106 membrane-localised Pit, a nucleotide binding-leucine rich repeat resistance (NLR)  
107 protein for the rice blast fungus *Magnaporthe oryzae*, associates with DOCK family  
108 GEF OsSPK1, thereby likely activating OsRac1 (Kawano *et al.*, 2010, Kawano *et al.*,  
109 2014, Wang *et al.*, 2018). A recent report regarding an involvement in defence  
110 reactions against rice blast mediated by the NLR protein PID3 (Zhou *et al.*, 2019)  
111 opens up the possibility of OsRac1 being a downstream hub of other rice NLR  
112 proteins.

113 In the barley-powdery mildew interaction, several barley proteins involved in ROP  
114 signaling or ROP activity regulation have been shown to influence fungal penetration  
115 success. The barley ROP RACB has been shown to act as susceptibility factor  
116 (Schultheiss *et al.*, 2002, Schultheiss *et al.*, 2003, Hoefle *et al.*, 2011). In the absence  
117 of the pathogen, RACB appears to be involved in cell polarization processes, as  
118 stable RACB silencing affects stomatal subsidiary cell and root hair development  
119 (Scheler *et al.*, 2016). The expression of a constitutively activated GTP-bound RACB  
120 supported fungal penetration success into barley epidermal cells, whereas silencing  
121 RACB by RNA interference (RNAi) renders epidermal cells less susceptible to fungal  
122 invasion. Two RACB-interacting proteins have been described as negative regulators  
123 of RACB function in susceptibility. First, the Microtubule-Associated ROP-GAP1  
124 (MAGAP1) is recruited to the cell periphery by activated RACB and limits  
125 susceptibility to powdery mildew likely by enhancing the GTP-hydrolyzing activity of  
126 RACB (Hoefle *et al.*, 2011). Second, activated RACB interacts with the cytoplasmic  
127 ROP binding kinase1 (RBK1) *in vivo* and enhances its kinase activity *in vitro*  
128 (Huesmann *et al.*, 2012). Transient silencing of RBK1 or RBK1-interacting protein  
129 SKP1 (type II S-phase kinase1-associated protein) suggested that RBK1 acts in  
130 negative regulation of RACB protein stability and hence in disease resistance (Reiner  
131 *et al.*, 2016).

132 In order to regulate cellular processes, ROPs need to activate or deactivate  
133 downstream executors (otherwise called ROP effectors, which is avoided here to

134 distinguish from pathogen effectors). The interaction to some of these executors is  
135 often indirect and achieved via scaffold proteins bridging the activated ROPs to their  
136 signal destination targets. Some ROP scaffold proteins have been described so far  
137 in detail, RACK1, ICR/RIPs and RICs. Rice RACK1 (Receptor for Activated C-Kinase  
138 1) interacts with several proteins in the OsRac1 immune complex supporting a role in  
139 rice innate immunity (Nakashima *et al.*, 2008). ICR/RIPs (Interactor of Constitutive  
140 Active ROP/ROP Interactive Partners) are required for cell polarity, vesicle trafficking  
141 and polar auxin transport (Lavy *et al.*, 2007, Hazak *et al.*, 2014). In barley, RIPa  
142 interacts with RAC1 and organizes microtubule arrays in concert with MAGAP1  
143 (Hoefle *et al.*, 2020). Barley RIPb interacts directly with RACB and enhances disease  
144 susceptibility towards powdery mildew (McCollum *et al.*, 2019 Preprint). RIC (ROP-  
145 Interactive and CRIB-domain containing) proteins, another class of scaffold proteins  
146 in ROP signaling, share a highly conserved CRIB motif (Cdc42/Rac Interactive  
147 Binding motif, Burbelo *et al.*, 1995), which is essential for the direct interaction with  
148 ROPs (Wu *et al.*, 2001). The CRIB domain is also present in a subset of ROP GAPs  
149 such as barley MAGAP1 (Schaefer *et al.*, 2011; Hoefle *et al.*, 2011). In barley, the  
150 knowledge about RIC protein functions is quite limited. RIC171, however, has been  
151 shown to not only interact directly with RACB, but also to increase fungal penetration  
152 efficiency in barley epidermal cells upon overexpression. Activated RACB recruits  
153 RIC171 to the cell periphery and, in the presence of *Bgh*, RIC171 accumulated at the  
154 haustorial neck close to the penetration site (Schultheiss *et al.*, 2008). In *Arabidopsis*  
155 *thaliana* (At), 11 different RIC proteins have been identified, that do not share  
156 common sequence homology outside their CRIB domain (Wu *et al.*, 2001). By  
157 directly interacting with AtROPs, AtRIC proteins are involved in numerous cellular  
158 processes. During salt stress, AtROP2 regulates microtubule organisation in an  
159 AtRIC1-dependent manner (Li *et al.*, 2017). AtRIC1 also interacts with AtROP6 in  
160 pavement cells to enhance the ordering of cortical microtubules upon hormonal  
161 signals (Fu *et al.*, 2009) and is involved in cell elongation during pavement cell  
162 morphogenesis (Higaki *et al.*, 2017). AtRICs counteract each other to a certain extent  
163 as well, as seen with AtROP1-interacting AtRIC3 and AtRIC4 during pollen tube  
164 growth. AtRIC3 regulates calcium influx and triggers actin depolymerisation, whereas  
165 AtRIC4 enhances actin polymerisation (Gu *et al.*, 2005). Light-induced stomatal  
166 opening is regulated via the AtROP2-AtRIC7 pathway. AtROP2 and AtRIC7 are likely  
167 to impinge on vesicular trafficking by inhibiting AtExo70B1, which results in a

168 diminished stomatal opening (Hong *et al.*, 2016). These examples emphasize the  
169 importance of ROP proteins as signaling hubs for various developmental processes  
170 as well as the role of RIC proteins in finetuning specific cellular responses.

171 Here we show results on barley RIC157, a CRIB domain-containing protein that  
172 interacts CRIB motif-dependently with RACB in yeast and *in planta*. Overexpression  
173 of RIC157 increases the powdery mildew penetration efficiency in barley leaf  
174 epidermal cells in a RACB-dependent manner. Cytosolic RIC157 is recruited to the  
175 cell periphery specifically by activated RACB and both proteins co-localise at the  
176 haustorial neck during the compatible interaction with *Bgh*. Our findings indicate a  
177 possible role of the RACB-RIC157 signaling module in promoting fungal penetration,  
178 thereby increasing susceptibility towards *Bgh*.

179

## 180 **Results**

### 181 **Identification of RIC proteins in barley**

182 Except for a couple of amino acids, individual RIC proteins typically show a lack of  
183 primary sequence homology to other proteins in the database outside their CRIB  
184 domain (Wu *et al.*, 2001). The highly conserved CRIB motif has been shown to  
185 interact directly with activated small RHO GTPases (Burbelo *et al.*, 1995, Aspenström  
186 1999). In order to identify additional RIC proteins in barley, we performed a BLAST  
187 search using the CRIB motif of previously described RACB interacting protein  
188 RIC171 (Schultheiss *et al.*, 2008) against the 2019 annotation of all barley coding  
189 sequences (Barley all CDS Morex v2.0 2019, [https://webblast.ipk-  
190 gatersleben.de/barley\\_ibsc/](https://webblast.ipk-gatersleben.de/barley_ibsc/)). Beside RIC171, we identified another seven proteins  
191 sharing the properties of RIC proteins, and named them according to their predicted  
192 amino acid sequence length RIC153 (HORVU.MOREX.r2.3HG0258770), RIC157  
193 (HORVU.MOREX.r2.6HG0469110), RIC163 (HORVU.MOREX.r2.5HG0443720),  
194 RIC168 (HORVU.MOREX.r2.2HG0170820), RIC170  
195 (HORVU.MOREX.r2.6HG0521090), RIC171 (HORVU.MOREX.r2.2HG0164690),  
196 RIC194 (HORVU.MOREX.r2.3HG0258620), RIC236  
197 (HORVU.MOREX.r2.2HG0122110). An amino acid sequence alignment of all eight  
198 barley RIC proteins illustrated no general domain homologies outside the highly  
199 conserved CRIB motif (Fig. 1). Interestingly, the CRIB motif was more C-terminally  
200 located in RICs 153, 163 and 194, similar to RIC2 and RIC4 of *Arabidopsis thaliana*  
201 (Wu *et al.*, 2001), while the other RICs (157, 168, 170, 171 and 236) contained the

202 CRIB motif closer to their N-terminal end. However, we didn't identify additional  
203 conserved domains shared by all members of the barley RIC protein family.  
204 RACB-mediated susceptibility towards powdery mildew is determined exclusively in  
205 barley leaf epidermal cells. Hence, in order to unravel downstream signaling  
206 components of RACB, we focused on barley leaf-expressed RIC proteins. Using  
207 online available gene expression databases ([https://webblast.ipk-](https://webblast.ipk-gatersleben.de/barley_ibsc/)  
208 [gatersleben.de/barley\\_ibsc/](https://webblast.ipk-gatersleben.de/barley_ibsc/)), we identified five leaf-expressed *RIC* genes (*RIC153*,  
209 *RIC157*, *RIC163*, *RIC194* and previously published *RIC171* (Schultheiss *et al.*, 2008).  
210 Despite there is little sequence conservation between RIC proteins outside their  
211 CRIB domain, we compared primary sequences of barley, *Arabidopsis thaliana* and  
212 rice (*Oryza sativa*) RICs using an available online amino acid motif discovery  
213 software (<http://meme-suite.org/tools/meme>). This discovered three previously non-  
214 described amino acid motifs shared by individual barley (*RIC157*, *RIC168*, *RIC171*),  
215 rice (*Os02g06660.1*, *Os04g53580.1*) and *Arabidopsis* RICs (*RIC10*, *RIC11*) (Suppl.  
216 Fig. S1) but not by all RIC proteins.

217

### 218 **RIC157 increases susceptibility of barley towards *Bgh* in a RACB-dependent** 219 **manner**

220 To investigate a potential function of *RIC157* during the barley-powdery mildew  
221 interaction, we analysed the penetration success of *Bgh* on barley epidermal cells  
222 during various conditions (Fig. 2). Single cell transient overexpression of *RIC157* had  
223 a strong effect on the penetration success of *Bgh* into barley epidermal cells (Fig.  
224 2A). The susceptibility to fungal cell entry increased by about 50% compared to  
225 control treatments, an outcome that is reminiscent of susceptibility levels observed  
226 after transient overexpression of constitutively activated CARACB(G15V) or *RIC171*  
227 (Schultheiss *et al.*, 2003, Schultheiss *et al.*, 2008). We did not observe the opposite  
228 effect, meaning a decreased fungal penetration after RNA interference (RNAi)-  
229 mediated silencing of *RIC157* compared to control levels (Fig. 2B). To check if this  
230 elevated susceptibility of barley epidermal cells after overexpression of *RIC157* is  
231 dependent on RACB, we analysed the fungal penetration efficiency by simultaneous  
232 transient overexpression of *RIC157* and silencing of endogenous RACB expression  
233 via RNAi (Fig. 2C). Interestingly, we did not observe an elevated fungal penetration  
234 rate, indicating that *RIC157* increases barley epidermal cell susceptibility in a RACB-  
235 dependent manner. We confirmed the efficiency of both RNAi silencing constructs via

236 co-expression of fluorescence tag-labelled targets and ratiometric fluorescence  
237 measurements (Suppl. Fig. S2).

238

### 239 **RIC157 interacts directly with RACB in yeast and *in planta***

240 RACB can directly interact with CRIB motif-containing proteins RIC171 and MAGAP1  
241 (Schultheiss *et al.*, 2008, Hoefle *et al.*, 2011). Therefore, it appeared likely that  
242 RIC157 can directly interact with RACB via its CRIB domain. We conducted different  
243 approaches to test for direct protein-protein interaction between RIC157 and RACB.  
244 In a targeted yeast-2-hybrid experiment, we showed that RIC157 directly interacts  
245 with RACB and with the constitutively activated CARACB(G15V) mutant, but not with  
246 the dominant-negative, GDP-bound DNRACB(T20N) mutant (Fig. 3A). Interestingly,  
247 we also observed a certain level of interaction between RIC157 and lower nucleotide  
248 affinity RACB mutant DNRACB(D121N). This particular mutation has been shown  
249 previously in RAS mutant D119N to behave either in a constitutively activated or a  
250 dominant-negative way, depending on the experimental setup (Cool *et al.*, 1999).  
251 The direct protein-protein interaction between RIC157 and RACB is dependent on  
252 the CRIB motif. RIC157 variants either lacking the CRIB motif completely or  
253 containing a CRIB motif that has been mutated at two highly conserved histidine  
254 residues (Burbelo *et al.*, 1995, Ash *et al.*, 2003), lose the ability to interact with either  
255 RACB form nearly entirely (Suppl. Fig. S3). To substantiate these results, we aimed  
256 to prove the fusion protein stability by immunoblotting (Suppl. Fig. S4). While all  
257 RACB variants were stably expressed and detectable, we were unable to confirm the  
258 stability of RIC157 variants in yeast in most of several independent experiments.  
259 Together with the fact that the yeast growth on selective medium was slow but  
260 dependent on the RIC157 construct, this suggests a high RIC157 turnover in yeast.  
261 In order to investigate the *in planta* interaction between RACB and RIC157, we  
262 performed Bimolecular Fluorescence Complementation (BiFC, synonym split-Yellow  
263 Fluorescent Protein (YFP)) experiments (Walter *et al.*, 2004). We therefore fused N-  
264 terminally N- and C-terminal YFP parts to RIC157 and RACB variants and transiently  
265 co-expressed complementary splitYFP fusion proteins in barley epidermal cells via  
266 particle bombardment. YFP fluorescence reconstitution was ratiometrically quantified  
267 against a co-expressed cytosolic mCherry fluorescence marker. As shown in Suppl.  
268 Fig. S5, YFP fluorescence was reconstituted to a significantly higher extent when  
269 split-YFP fusions of RIC157 were co-expressed with split-YFP fusions of RACB and



270 CARACB(G15V), compared to co-expressions with DNRACB(T20N) and  
271 DNRACB(D121N). This suggests that RIC157 might preferentially interact with  
272 activated RACB *in planta*. We confirmed the stability of split-YFP fusion proteins via  
273 immunoblot analysis of total protein samples extracted from transformed barley  
274 mesophyll protoplasts (Suppl. Fig. S5B).

275 Since split-YFP experiments do not unequivocally reveal direct protein-protein  
276 interaction, we further analysed the interaction between RACB and RIC157 by FLIM-  
277 FRET and in particular the Green Fluorescent Protein (GFP) lifetime reduction (Fig.  
278 3B). We fused GFP N-terminally to RIC157 and mCherry N-terminally to different  
279 RACB forms and transiently co-expressed respective combinations in barley  
280 epidermal cells via particle bombardment. Co-expression of GFP-RIC157 and free  
281 mCherry resulted in an average GFP lifetime of about 2.6 ns and is representative of  
282 a non-FRET negative control setup. GFP lifetime was slightly lower compared to the  
283 negative control samples in cells co-expressing GFP-RIC157 and mCherry-  
284 DNRACB(T20N). In contrast to that, the co-expression of GFP-RIC157 with mCherry-  
285 CARACB(G15V) led to a strong and highly significant reduction in GFP lifetime to  
286 approximately 2.2 ns. This GFP lifetime reduction clearly demonstrates a direct  
287 protein-protein interaction between RIC157 and activated RACB *in planta*. A very  
288 similar reduction in GFP lifetime we observed when GFP-RIC157 was co-expressed  
289 with mCherry-RACB suggesting an interaction of RIC157 with the wildtype form of  
290 RACB. The FLIM approach also indicated an interaction of RIC157 with the lower  
291 nucleotide affinity RACB mutant DNRACB(D121N). However, the spreading of the  
292 single data points was immense from no GFP lifetime reduction down to GFP lifetime  
293 reductions reminiscent of mCherry-CARACB(G15V)-expressing cells. Since the  
294 D121N mutation leads to a lower nucleotide affinity, this particular result we see here  
295 might have been provoked by different physiological cell conditions which in some  
296 cells stabilize the GDP-bound, inactive form and in others the GTP-bound, activated  
297 form of the DNRACB(D121N) mutant. In total, these different experimental  
298 approaches strongly suggest the direct protein-protein interaction between RIC157  
299 and the activated form of RACB.

300

### 301 **Recruitment of RIC157 to the cell periphery is RACB dependent**

302 To investigate the subcellular localisation of RIC157, we fused GFP N-terminally to  
303 RIC157 and transiently expressed this construct in barley epidermal cells via biolistic

304 transformation. As shown in Figure 4A (upper row), RIC157 localises to the cytosol,  
305 but a lack of GFP fluorescence in the nucleoplasm indicated that GFP-RIC157 is  
306 excluded from the nucleus. However, we repeatedly observed a strong fluorescent  
307 signal around the nucleus suggesting a potential affinity of RIC157 to the nuclear  
308 envelope/endoplasmic reticulum membrane or proteins associated to it.

309 Since we found a direct protein-protein interaction between RIC157 and RACB, we  
310 checked the potential impact of RACB on the subcellular localisation of RIC157 by  
311 transiently co-expressing GFP-RIC157 with various untagged forms of RACB (Suppl.  
312 Fig. S6). The cytoplasmic localisation of RIC157 is not significantly affected in the  
313 presence of RACB or the lower nucleotide affinity dominant negative  
314 DNRACB(D121N) mutant. However, we observed a decrease in cytoplasmic and  
315 nuclear envelope-localised GFP fluorescence and an accumulation of GFP  
316 fluorescence at the cell periphery when GFP-RIC157 was co-expressed with the  
317 constitutively activated CARACB(G15V) form.

318 Because untagged proteins cannot be properly monitored, we extended our analysis  
319 in barley epidermal cells using mCherry-tagged RACB forms (Fig. 4A). Similarly, we  
320 detected GFP-RIC157 in the cytoplasm where it co-localised with mCherry fusions of  
321 RACB and DNRACB(D121N). In contrast to that, as with the untagged activated  
322 RACB, we detected a similarly strong re-localisation of GFP-RIC157 to the cell  
323 periphery in the presence of mCherry-tagged CARACB(G15V) that likewise  
324 accumulated at this site. This suggests that activated RACB, like other ROPs  
325 associating with the plasma membrane probably via its C-terminal prenylation and  
326 possible palmitoylation (Schultheiss *et al.*, 2003; Yalovsky 2015), recruits RIC157 to  
327 the cell periphery.

328 In order to check if this RIC157 recruitment to the cell periphery is indeed due to the  
329 co-expression with activated RACB, we simultaneously transformed barley epidermal  
330 cells with a RNAi construct to silence RACB (Fig. 4B). Without RACB silencing, co-  
331 expression of GFP-RIC157 and mCherry-CARACB(G15V) again lead to  
332 accumulation of both fusions proteins at the cell periphery. RNAi-mediated silencing  
333 of RACB on the other hand did not only diminish the mCherry fluorescence to almost  
334 non-detectable levels demonstrating RACB silencing took place, it also decreased  
335 GFP fluorescence at the cell periphery and increases GFP fluorescence in the  
336 cytoplasm. This result clearly supports that the observed recruitment of RIC157 to the  
337 cell periphery is mediated by activated RACB. To further confirm the recruitment of

338 RIC157 by activated RACB from the cytoplasm to the plasma membrane, we took  
339 advantage of a mCherry-tagged plasma membrane marker, pm-rk (Nelson *et al.*,  
340 2007), and analysed the potential co-localization of GFP-RIC157 with pm-rk in the  
341 absence and presence of co-overexpressed non-tagged constitutively activated  
342 RACB (CARACB(G15V), Suppl. Fig. S7). In the presence of activated RACB,  
343 fluorescence signals of GFP and mCherry overlapped to a higher extent compared to  
344 an experimental setup lacking overexpressed activated RACB. This unambiguously  
345 supports our previous findings that RIC157 is recruited by activated RACB to cell  
346 peripheral and plasma-membrane associated localisations.

347 Fluorescent proteins potentially have an impact on the functionality of the proteins to  
348 which they are fused due to conformational hindrances. In order to rule out that  
349 RIC157 fused to fluorescent proteins behaves differently than untagged RIC157, we  
350 analysed the penetration ability of *Bgh* in barley epidermal cells overexpressing GFP-  
351 tagged RIC157 (Fig. 2D). The powdery mildew fungus benefited from the presence of  
352 GFP-RIC157, similar to untagged RIC157, suggesting that GFP fusion to RIC157 did  
353 not prevent its ability to enhance susceptibility towards *Bgh* infection. Moreover, this  
354 supports that localisation of N-terminally tagged RIC157 proteins that we observe,  
355 represents the localization of a functional RIC157 protein.

356

### 357 **RIC157 and RACB co-localise and accumulate at penetration site**

358 Co-localisation experiments in unchallenged barley epidermal cells demonstrated a  
359 recruitment of RIC157 to the cell periphery in the presence of activated RACB. In  
360 order to investigate if both proteins co-localise at a more specific subcellular site  
361 during the interaction with the powdery mildew fungus, we analysed the localisation  
362 of transiently co-expressed RIC157 and CARACB(G15V) in epidermal barley cells  
363 18-24 hours after inoculation with *Bgh*. As shown in Fig. 5, fluorescent protein fusions  
364 of RIC157 and activated RACB accumulate close to the fungal penetration site,  
365 forming a cone outlining the neck of a developing haustorial initial. The  
366 RIC157/CARACB(G15V) co-localisation was much more defined than the  
367 fluorescence signal of simultaneously expressed cytoplasmic mCherry (Fig. 5B),  
368 indicating a specific membrane-associated co-localisation in epidermal cells that are  
369 successfully penetrated by the fungus.

370

371

## 372 **Discussion**

373 In the presence of *Bgh*, high activity of the ROP protein RACB appears to be  
374 disadvantageous for barley. To date, however, our knowledge about the exact  
375 RACB-regulated cellular processes, of which the fungus takes advantage, is still quite  
376 limited. Albeit we observed a role of RACB or RACB-interacting proteins in polar cell  
377 development and cytoskeleton organization (Opalski *et al.*, 2005; Hoefle *et al.*, 2011;  
378 Huesmann *et al.*, 2012; Scheler *et al.*, 2016; Nottensteiner *et al.*, 2018), a direct  
379 mechanistic link between RACB-mediated susceptibility and RACB-regulated  
380 cytoskeleton organisation or polar membrane trafficking is still missing. Our studies,  
381 however, open up the prospect of a RACB-regulated pathway via a ROP-specific  
382 scaffold protein that might be exploited in barley epidermal cells by *Bgh* to support  
383 susceptibility towards powdery mildew.

384

## 385 **RIC proteins as scaffolds in RACB downstream signalling**

386 In a signaling cascade, scaffold proteins are as vital for mediating the molecular  
387 response as upstream signaling hubs or downstream executors. These scaffolds  
388 establish not just a hub-executor connection, by doing so they represent also the first  
389 branching point in the signalling cascade that eventually leads to specific effects  
390 without possessing any kind of enzymatic activity themselves (Zeke *et al.*, 2009,  
391 Good *et al.* 2011). Regarding signaling pathways, ROPs function as signaling hubs  
392 and have been shown to be involved in loads of cellular processes, and for some  
393 ROPs the regulatory role in different, sometimes even antagonistic signalling  
394 pathways has been described (Gu *et al.*, 2005, Nibau *et al.*, 2006, Feiguelman *et al.*,  
395 2018). If ROPs do not interact directly with downstream executors, RIC proteins (and  
396 also ICRs/RIPs, Feiguelman *et al.*, 2018) are considered bridging units creating the  
397 scaffold for specific branches of ROP signaling (Schultheiss *et al.*, 2008, Craddock *et al.*,  
398 2012, Zhou *et al.*, 2015, Hong *et al.*, 2016). Besides RIC171 and RIC157, we  
399 identified another six proteins of different sizes in barley that, by the above-  
400 mentioned definition, we consider RIC proteins. Potentially, there is a difference  
401 between monocots and dicots regarding the number of RIC proteins, which is  
402 slightly higher in Arabidopsis (Wu *et al.*, 2001), suggesting a higher probability of  
403 either functional redundancies, diversification or antagonistic partners in dicots (Gu *et al.*,  
404 2005). Redundancies between the barley leaf-expressed RIC proteins is,  
405 considering the low primary sequence conservation, hard to predict and not known

406 yet. The partial similarities between leaf-expressed RIC157 and RIC171 (Suppl. Fig.  
407 1) could, however, indicate functions in similar signaling pathways.

408

#### 409 **RIC157 increases susceptibility towards powdery mildew**

410 In this study, we concentrated on leaf-expressed RIC157 and show, that the transient  
411 RIC157 overexpression leads to a strong increase in barley epidermal cell  
412 susceptibility towards powdery mildew infection (Fig. 2A). Thus, the fungus benefits  
413 from a highly abundant RIC157. The RNA interference-mediated silencing of RIC157,  
414 however, did not lead to a higher resistance compared to control-treated cells (Fig.  
415 2B). This could have different reasons. Although we have shown a significant  
416 reduction of ectopically expressed RIC157 protein levels in the presence of the  
417 RIC157 RNAi silencing construct (Suppl. Fig. S2), it must be noted that RNAi-based  
418 silencing is never 100% efficient. Remaining endogenous RIC157 transcript levels  
419 might be sufficient to allow for control level penetration efficiencies. Additionally, the  
420 protein turnover rate of RIC157 is unknown, meaning even with a high RNAi silencing  
421 efficiency it is still possible that RIC157 protein, expressed before transient  
422 transformation with the RNAi silencing construct, is present throughout the infection  
423 assay and sufficiently abundant to support penetration. Another very important point  
424 that needs to be stressed is the function of RACB or ROPs in general as signaling  
425 hubs (Nibau *et al.*, 2006). The signaling via RIC157 is likely not the only RACB-  
426 regulated path that leads to susceptibility. Shutting down the particular RACB-RIC157  
427 route probably still leaves other RACB signaling branches functional, which are  
428 potentially involved to a certain extent in RACB-mediated susceptibility as well. An  
429 increased resistance towards fungal infection was, however, achieved once the  
430 signaling hub was removed or switched off by silencing RACB or by transient  
431 overexpression of its presumable antagonist MAGAP1 (Schultheiss *et al.*, 2002,  
432 Hoefle *et al.*, 2011). In accordance with this, RACB-dependency of the RIC157-  
433 promoted susceptibility (Fig. 2C) suggests that even abundant RIC157 still requires  
434 the presence of RACB to function as a susceptibility factor.

435

#### 436 **RIC157 interacts with RACB and is recruited to the cell periphery**

437 We have demonstrated that RIC157 can interact directly with RACB in yeast and *in*  
438 *planta* (Fig. 3, Suppl. Fig. 5). In barley epidermal cells, RIC157 showed interaction  
439 with activated RACB, but not with the dominant negative form. The observed

440 interaction in yeast or via FLIM analysis *in planta* between RIC157 and the dominant-  
441 negative form DNRACB(D121N) could be explained by the different experimental  
442 setups and/or physiological cell conditions. G-proteins with this particular mutation  
443 have been observed previously to display either dominant-negative or constitutively  
444 activated properties (Cool *et al.*, 1999). DNRACB(D121N) has an intrinsic lower  
445 nucleotide affinity, however in yeast this form could be GTP bound and hence  
446 resemble the activated RACB.

447 The subcellular *in planta* CARACB(G15V)-RIC157 interaction site seen in BiFC and  
448 FLIM-FRET experiments appeared to be at the cell periphery. This seems  
449 conclusive, because RIC157 preferentially interacted with activated RACB. Activated  
450 ROPs are supposed to be associated with negatively charged phospholipids in  
451 plasmamembrane nanodomains, which is additionally promoted via posttranslational  
452 prenylation and S-acylation (Yalovsky 2015, Platre *et al.*, 2019). In *Arabidopsis*  
453 *thaliana* it has even been recently shown that particular phosphoinositides are  
454 recruited by filamentous pathogens to the plant-microbe interface (Qin *et al.*, 2020),  
455 suggesting a similar mechanism during powdery mildew infection of barley.  
456 Fluorescence-tagged RIC157 alone did not show any specific localisation in the  
457 absence of the fungus, although it seems to be excluded from the nucleus (Fig. 4). In  
458 the presence of activated RACB, however, RIC157 undergoes a relocalisation from  
459 the cytoplasm to the cell periphery/plasma membrane, where the interaction with the  
460 activated ROP takes place. It had previously been shown that expression of activated  
461 GFP-RACB alone leads to its preferential localisation at the cell periphery with a  
462 cytosolic background (Schultheiss *et al.*, 2003). We assume that a potential influence  
463 of endogenous levels of RIC157 or activated RACB on the localisation of their  
464 overexpressed interaction partner is probably negligible in our experimental setup. A  
465 similar recruitment to the cell periphery has been observed with other proteins that  
466 directly interact with activated RACB (Schultheiss *et al.*, 2008, Hoefle *et al.*, 2011,  
467 Huesmann *et al.*, 2012, McCollum *et al.*, 2019 Preprint), reinforcing the model that  
468 RACB activation is preceding the recruitment of interaction partners and that  
469 downstream RACB signaling is initiated at the plasma membrane. This is further  
470 supported since a RACB mutant version lacking the C-terminal CSIL motif for  
471 prenylation localizes to the cytoplasm and is inactive in promoting susceptibility  
472 (Schultheiss *et al.*, 2003).

473 With regard to RACB's and RIC157's capability to support fungal infection, the  
474 recruitment of RIC157 to the cell periphery becomes even more interesting. Our data  
475 suggest a recruitment of RIC157 to the fungal penetration site (Fig. 5). The cone-like  
476 structure surrounding the haustorial neck indicates a subcellular co-localisation with  
477 activated RACB. However, the co-localisation of RACB and fungal infection-  
478 supporting RACB-interactors is not exclusive to RIC157. RIC171 and RIPb, two  
479 proteins also considered scaffolds in RACB signalling, co-localise with RACB at the  
480 haustorial neck (Schultheiss *et al.*, 2008, Hückelhoven and Panstruga 2011,  
481 McCollum *et al.*, 2019 Preprint). Future experiments may show, whether subcellular  
482 co-concentration of RACB and RACB-interacting proteins indicate a specific lipid  
483 composition of the haustorial neck, which then recruits activated ROPs, or a  
484 membrane domain of high ROP activity due to local GEF activity, or perhaps  
485 indicates an exclusion of ROPs from further lateral diffusion into the EHM, which was  
486 suggested to be controlled at the haustorial neck (Koh *et al.*, 2005).

487

#### 488 **RIC157 and susceptibility**

489 RIC157 transiently overexpressed in barley epidermal cells localises to the cytoplasm  
490 and enhances fungal penetration efficiency in a RACB-dependent manner. Activated  
491 RACB, however, associates with the plasma membrane where it likely recruits  
492 RIC157 for downstream signaling. Thus, transiently overexpressed and endogenous  
493 RIC157 might promote RACB-mediated susceptibility upon recruitment to the cell  
494 periphery by endogenously present activated RACB. Only a small fraction of  
495 overexpressed RIC157 is possibly recruited to the cell periphery without concomitant  
496 co-overexpression of activated RACB. This means that such a minute fluorescence  
497 localisation change might be probably undetectable in our experimental setup, but it  
498 needs to be emphasized that we do not assume RIC157 promoting susceptibility to  
499 powdery mildew from a solely cytoplasmic site. Indeed, in front of a cytoplasmic  
500 background, RIC157 is also visible at the cell periphery without co-expression of  
501 CARACB(G15V), possibly reflecting partial recruitment by endogenous ROPs (Fig.  
502 4A).

503 The domain and sequence similarity between barley RIC157 and *Arabidopsis*  
504 *thaliana* RIC10 and RIC11 (Suppl. Fig. 1) does not necessarily indicate similar  
505 functions of both proteins. Beside AtRIC10 and AtRIC11, for which nothing is known  
506 to date about their biological function, RIC157 also shares limited amino acid motif

507 similarity with AtRIC1, AtRIC3 and AtRIC7 (Suppl. Fig. 8), for which an involvement  
508 in cytoskeleton organization has previously been demonstrated. From these three  
509 Arabidopsis RIC proteins, AtRIC1 appears to be an interesting candidate from which  
510 a RIC157 function could be deduced. AtRIC1 has been shown to interact with ROP6  
511 to activate the p60 subunit of Katanin, a microtubule-severing enzyme (Lin *et al.*,  
512 2013), as opposed to the interaction with AtROP2 that negatively regulates the action  
513 of AtRIC1 on microtubules (Fu *et al.*, 2005). The microtubule-severing activity of  
514 Katanin might even be regulated by AtROP2, AtROP4 and AtROP6 (Ren *et al.*, 2017)  
515 via AtRIC1. Whether barley RIC157 also fulfils such a regulatory role in organising  
516 microtubules still remains to be seen. Regarding the subcellular localisation there  
517 are, however, clear differences: Barley RIC157 localises to the cytoplasm, AtRIC1  
518 associates with microtubules (Fu *et al.*, 2005). However, when microtubule arrays in  
519 penetrated and attacked but non-penetrated barley epidermal cells were compared,  
520 penetration success was strongly associated with parallel non-polarized microtubule  
521 arrays in the cell cortex and a diffuse or depleted microtubule structure at the  
522 haustorial neck (Hoefle *et al.*, 2011). AtRIC3 has been shown to be involved in the  
523 pollen tube growth process, where its function leads to actin disassembly in a ROP1-  
524 dependent manner upon calcium influx into the cytoplasm (Gu *et al.*, 2005, Lee *et al.*,  
525 2008). Likewise, AtRIC7 was recently reported to influence vesicle trafficking in  
526 stomata resulting in the suppression of an elevated stomatal opening after ROP2-  
527 dependent inhibition of the exocyst complex *via* Exo70B1 (Hong *et al.*, 2016). Both F-  
528 actin organization and exocyst function are important in penetration resistance to *Bgh*  
529 (Opalski *et al.*, 2005, Miklis *et al.*, 2007, Ostertag *et al.*, 2012). Therefore, the  
530 discovery of RIC157 as a RACB-dependent susceptibility factor may pave the way to  
531 a better understanding of ROP-steered processes that are pivotal for fungal invasion  
532 into barley epidermal cells. The challenge will be to find the downstream factors that  
533 RIC157 activates and to understand how RIC157 interacts with RACB in the  
534 presence of several other RACB interactors. We assume that several diverse RICs  
535 and ICR/RIP proteins could form a cooperative network for orchestrating F-actin,  
536 microtubule and membrane organization at the site of fungal entry.

537

## 538 **Experimental procedures**

### 539 **Plant and fungal growth conditions**



540 Wildtype barley (*Hordeum vulgare*, cultivar „Golden Promise“) was cultivated in long  
541 day conditions (16 hours day light, 8 hours darkness) at a temperature of 18°C with a  
542 relative humidity of 65% and a light intensity of 150 $\mu\text{mol s}^{-1} \text{m}^{-2}$ .

543 The biotrophic powdery mildew fungus *Blumeria graminis* f.sp. *hordei* A6 was used in  
544 all experiments. It was cultivated and propagated on barley „Golden Promise“ under  
545 the same condition described above.

546

### 547 **Cloning of constructs**

548 Via a Two-Step Gateway cloning approach, in a first PCR *RIC157*  
549 (HORVU.MOREX.r2.6HG0469110) was amplified from a barley cDNA pool prepared  
550 from leaf and epidermal peels using gene-specific primers *RIC157\_GW\_for* and  
551 *RIC157\_GW\_rev+STOP* (Suppl. Table 1) creating an incomplete Gateway  
552 attachment site overhang. A second PCR using primers *attB1* and *attB2* completed  
553 the attachment sites. To create a Gateway entry clone of *RIC157*, the amplified  
554 product was recombined into pDONR223 (Invitrogen) via BP-reaction using Gateway  
555 BP Clonase™ II according to manufacturer's instruction (Thermo Fisher Scientific).

556 To clone *RIC157 $\Delta$ CRIB*, both fragments upstream and downstream of CRIB motif  
557 were amplified separately using primers *RIC157\_GW\_for* and *RIC157delCRIB\_rev*  
558 for PCR1, *RIC157delCRIB\_for* and *RIC157\_GW\_rev+STOP* for PCR2, creating  
559 overlapping overhangs. In PCR3 both fragments together with primers  
560 *RIC157\_GW\_for* and *RIC157\_GW\_rev+STOP* completed *RIC157 $\Delta$ CRIB* with  
561 incomplete Gateway attachment sites overhangs. Completion of attachment sites  
562 and creating an entry clone in pDONR223 was done as described above. To clone  
563 *RIC157-H37Y-H40Y*, a site-directed mutagenesis using primers  
564 *CRIB157H37&40Y\_for* and *CRIB157H37&40Y\_rev* was performed according to  
565 QuikChange® Site-Directed Mutagenesis Protocol (Stratagene). For cloning entry  
566 constructs of *RACB* variants, primers *RACB\_GW\_for* and *RACB\_GW\_rev* were used  
567 to amplify *RACB* from previously described constructs (Schultheiss *et al.*, 2003) and  
568 cloned into pDONR223 via BP as described above. To clone *DNRACB(D121N)*, a  
569 site-directed mutagenesis using primers *RACB\_D121N\_fw* and *RACB\_D121N\_rv*  
570 was performed according to QuikChange® Site-Directed Mutagenesis Protocol  
571 (Stratagene).

572 For RNA interference (RNAi) silencing of *RIC157* in barley, we PCR-amplified two  
573 *RIC157* fragments, a 97bp fragment with primers *RIC157\_RNAi\_NotI\_for* and

574 RIC157\_RNAi\_EcoRI\_rev containing NotI and EcoRI restriction sites, and a 324bp  
575 fragment with primers RIC157\_RNAi\_EcoRI\_for and RIC157\_RNAi\_XbaI\_rev  
576 containing EcoRI and XbaI restriction sites. After restriction digest of all sites, ligating  
577 into pIPKTA38 via NotI and XbaI sites we created a *RIC157\_RNAi* entry construct  
578 lacking the CRIB motif nucleotide sequence to prevent off-target silencing of other  
579 CRIB-domain containing RNAs. The *RIC157\_RNAi* sequence was then cloned via LR  
580 reaction using Gateway LR Clonase™ II according to manufacturer's instruction  
581 (Thermo Fisher Scientific) into RNAi expression plasmid pIPKTA30N to create a  
582 double-strand RNAi expression construct (Douchkov *et al.*, 2005).

583 For Yeast-2-Hybrid expression clones, entry clones of *RIC157* and *RACB* variants  
584 were introduced into prey plasmid pGADT7-GW and pGBKT7-GW via LR reaction  
585 using Gateway LR Clonase™ II according to manufacturer's instruction (Thermo  
586 Fisher Scientific). pGADT7-GW and pGBKT7-GW have been modified from pGADT7  
587 and pGBKT7 (Clontech) into a Gateway-compatible form using Gateway™ Vector  
588 Conversion System (Thermo Fisher Scientific). To create *RACB* variants lacking C-  
589 terminal prenylation sequence, a premature STOP-Codon was introduced by site-  
590 directed mutagenesis as described above using primers delCSIL\_for and  
591 delCSIL\_rev.

592 In order to clone BiFC constructs, we PCR amplified a *RIC157* full-length fragment  
593 with primers RIC157\_BamHI\_for and RIC157\_KpnI\_rev containing BamHI and KpnI  
594 restriction sites. After restriction digest, we ligated this construct into pUC-  
595 SPYNE(R)173 (Waadt *et al.*, 2008).

596 For localisation and overexpression studies in barley, *RIC157* and *RACB* variants in  
597 pDONR223 were used as entry constructs to clone them into various pGY1-based  
598 CaMV35S promoter-driven expression vectors (Schweizer *et al.*, 1999) via LR  
599 reaction as described above. Empty pGY1 (encoding for no tag) was rendered  
600 Gateway-compatible via Gateway™ Vector Conversion System (Thermo Fisher  
601 Scientific). To create expression vectors for proteins C- or N-terminally tagged by  
602 GFP or mCherry, Gateway Reading Frame Cassettes for C- and N-terminal fusions,  
603 respectively, were integrated into a pGY1-plasmid backbone upon XbaI digestion and  
604 combined at 5' or 3' with sequences of monomeric GFP or mCherry. Cloning  
605 procedure was performed using In-Fusion HD cloning kit (Takara Bio USA).  
606 Constructs for GFP and mCherry upstream or downstream of the Gateway cassette  
607 were amplified using primers GW\_RfA\_mCherry-F, GW\_RfA\_mGFP-F,

608 GW\_RfA\_Xba-R, GW\_Xba\_RfB-F, GW\_RfB-R, meGFP-STP-F, mCherry-STP-F,  
609 XFP-noSTP\_Xba-F, XFP-noSTP-R, meGFP-noSTP-R, mCherry-STP\_Xba-R and  
610 meGFP-STP\_Xba-R.

611 The RACB RNAi construct, RACB BiFC constructs have been described previously  
612 (Schultheiss *et al.*, 2003, Schultheiss *et al.*, 2008, Schnepf *et al.*, 2018, McCollum *et*  
613 *al.*, 2019 Preprint).

614

### 615 **Barley epidermal cell transformation and penetration efficiency assessment**

616 For transient overexpression in barley, primary leaf epidermal cells of 7d old plants  
617 were transformed using biolistic bombardment with 1µm gold particles that were  
618 coated with 2µg of each test plasmid and additionally with 1µg of a cytosolic  
619 transformation marker. After mixing the gold particles with plasmid combinations,  
620 CaCl<sub>2</sub> (0.5M final concentration) and 3.5µl of 2mg/ml Protamine (Sigma) were added  
621 to each sample. The gold particle solution was incubated at room temperature for  
622 30min, washed twice with 500µl Ethanol (first 70%, then 100%) and eventually  
623 dissolved in 6µl 100% ethanol per biolistic transformation. After shooting, leaves  
624 were incubated at 18°C.

625 For localisation and BiFC experiments, leaves were analysed 2 days after  
626 transformation. For FRET-FLIM analysis of RACB-RIC157 interaction, barley primary  
627 leaves of 7d old plants were transiently transformed. Therefore, 2ug of mCherry-  
628 RACB and 1ug meGFP-RIC157 containing plasmids were coated on gold particles  
629 for biolistic transformation of single barley epidermal cells.

630 For inoculation with *Bgh*, fungal spores were manually blown in a closed infection  
631 device over transformed leaves either 6 hours after transformation (for microscopic  
632 analyses 16 hours after inoculation) or 1 day after transformation (to check  
633 penetration efficiency 48 hours after inoculation).

634 To analyse penetration efficiency, a transient assay system based on a cytosolic  
635 GUS marker was used as described previously (Schweizer *et al.*, 1999). The reporter  
636 gene construct pUbiGUSPlus was a gift from Claudia Vickers (Addgene plasmid #  
637 64402; <http://n2t.net/addgene:64402>; RRID:Addgene\_64402, Vickers *et al.*, 2003).  
638 Additionally to overexpression or RNAi silencing constructs, each barley leaf was co-  
639 transformed with pUbiGUSPlus. 48 hours after *Bgh* inoculation, leaves were  
640 submerged in GUS staining solution (0.1M Na<sub>2</sub>HPO<sub>4</sub>/NaH<sub>2</sub>PO<sub>4</sub> pH 7.0, 0.01 EDTA,  
641 0.005M Potassium hexacyanoferrat (II), 0.005M Potassium hexacyanoferrat (III),

642 0.1% (v/v) Triton X-100, 20% (v/v) Methanol, 0.5mg/mL 1.5-bromo-4-chloro-3-  
643 indoxyl- $\beta$ -D-glucuronic acid). For the solution to enter the leaf interior, a vacuum was  
644 applied. The leaves were incubated at 37°C over night in GUS staining solution and  
645 subsequently for at least 24 hours in 70% Ethanol. Fungal structures were stained  
646 with ink-acetate solution (10% ink, 25% acetic acid). Transformed cells were  
647 identified after GUS staining with light microscopy. An established haustorium was  
648 considered a successful penetration and for each sample at least 50 interactions  
649 were analysed. Barley epidermal cells transformed with the empty expression  
650 plasmid were used as negative control.

651

### 652 **Barley protoplast preparation and transformation**

653 To prepare protoplasts from barley mesophyll cells, the lower epidermis of primary  
654 leaves from 7 day-old barley plants was peeled and the leaves were incubated 3 to 4  
655 hours at room temperature in the darkness while floating with the open mesophyll  
656 facing downwards on an enzymatic digestion solution: 0.48M mannitol, 0.3% (w/v)  
657 Gamborg B5, 10mM MES pH 5.7, 10mM CaCl<sub>2</sub>, 0.5% (w/v) Cellulase R10, 0.5%  
658 (w/v) Driselase, 0.5% Macerozyme R10. After enzymatic treatment, an equal amount  
659 of W5 solution was added: 125mM CaCl<sub>2</sub>, 154mM NaCl, 5mM KCl, 2mM MES pH  
660 5.7. Upon filtering through a 40 $\mu$ m nylon mesh, the protoplasts were pelleted 5min at  
661 200g and carefully resuspended in 10ml W5 solution. After another centrifugation  
662 step, the protoplast concentration was adjusted to 2 x 10<sup>6</sup> cells per mL in MMG  
663 solution: 0.4M mannitol, 15mM CaCl<sub>2</sub>, 2mM MES pH 5.7. For each transformation  
664 sample, 1mL protoplast solution was mixed with 50 $\mu$ g of each plasmid and 1.1mL  
665 PEG solution (40% (w/v) PEG4000, 0.1M mannitol, 0.2M CaCl<sub>2</sub>) and incubated  
666 20min at room temperature in the darkness. Afterwards, 4.4mL of W5 solution was  
667 added to each transformation and gently mixed. After another pelleting at 200g, the  
668 protoplasts were resuspended in 1mL W1 solution (0.5M mannitol, 20mM KCL, 4mM  
669 MES pH 5.7) and incubated in the darkness at room temperature for at least 16  
670 hours.

671

### 672 **Yeast-2-Hybrid**

673 Yeast strain AH109 was transformed with bait (pGBKT7) and prey (pGADT7)  
674 constructs by following the small scale yeast transformation protocol from  
675 Yeastmaker<sup>TM</sup> Yeast Transformation System 2 (Clontech). Upon transformation,

676 yeast cells were plated on Complete Supplement Medium (CSM) plates lacking  
677 leucine and tryptophan (LW) and incubated for 3 days at 30°C. A single colony was  
678 taken to inoculate 5mL of LW-dropout liquid medium that was incubated with shaking  
679 over night at 30°C. The next day, 2mL of culture was pelleted for immunoblot  
680 analyses. 7.5µL of undiluted overnight culture (and additionally a 1:10, 1:100 and  
681 1:1000 for control purposes) were dropped on CSM plates lacking leucine and  
682 tryptophan, and also on CSM plates lacking leucine, tryptophan and adenine. Plates  
683 were incubated for at least 3 days at 30°C. Growth on CSM-LW plates confirmed the  
684 successful transformation of both bait and prey plasmids, while growth on CSM-  
685 LWAd plates indicated activation of reporter genes. As control for a positive and  
686 direct protein-protein interaction we routinely used murine p53 and the SV40 large T-  
687 antigen (Li and Fields 1993).

688

### 689 **Immunoblot analysis**

690 For total protein extraction from yeast, we followed the protocol described in  
691 Kushnirov (2000) using 2mL of over night culture of yeast transformants grown in  
692 CSM-LW liquid medium. The extraction of total protein from barley mesophyll  
693 protoplasts was performed by pelleting transformed protoplasts 5min at 200g. The  
694 pellet was resuspended thoroughly in 50µL of 2x SDS loading buffer by vortexing. A  
695 complete protein denaturation was achieved by boiling protoplast samples 10min at  
696 95°C. After shortly spinning down the samples, the stability of fusion proteins in yeast  
697 and in planta was assessed via Sodium dodecylsulfate-polyacrylamide gel  
698 electrophoresis (SDS-PAGE) and immunoblotting on PVDF membranes. Antibodies  
699 used for detecting protein bands on PVDF membranes came from SantaCruz  
700 Biotechnology (<https://www.scbt.com/scbt/cart/cart.jsp>): anti-GFP(B-2), anti-  
701 cMyc(9E10), anti-HA(F-7) and horseradish-peroxidase conjugated anti-mouse.  
702 Presence of antibodies on membrane was visually detected by using SuperSignal  
703 West Femto Chemiluminescence substrate (ThermoFisher Scientific). Equal protein  
704 loading and blotting success was confirmed via Ponceau S-staining of the PVDF  
705 membrane.

706

### 707 **Microscopy**

708 Localisation and BiFC experiments were analysed on a Leica TCS SP5 confocal  
709 laser scanning microscope. The excitation laser wavelengths were 458nm for CFP,

710 488nm for GFP, 514nm for YFP and 561nm for RFP and mCherry, respectively. The  
711 fluorescence emission was collected from 462 to 484nm for CFP, from 500-550nm  
712 for GFP, from 515 to 550nm for YFP and from 569 to 610nm for RFP and mCherry.  
713 Barley epidermal cells were imaged via sequential scanning as z-stacks in 2 $\mu$ m  
714 increments. Maximum projections of each z-stack were exported as Tiff files from the  
715 Leica LAS AF software (version 3.3.0).

716 Localisation experiments of fluorescent protein fusions and BiFC analysis in barley  
717 epidermal cells were conducted from 24 hours until 48 hours after biolistic  
718 transformation. Regarding ratiometric BiFC quantification using Leica LAS AF  
719 software (version 3.3.0), the fluorescence intensity was evaluated over the whole cell  
720 area and the ratio between YFP and cytosolic mCherry fluorescence signal was  
721 calculated. For each BiFC combination, the fluorescence of at least 20 cells was  
722 measured.

723 For FRET-FLIM analysis of RACB-RIC157 interaction, the expression of the  
724 fluorophore-fusion proteins was analysed 1 day after transformation using an  
725 Olympus FluoView™3000 inverse laser scanning confocal microscope with an  
726 UPLSAPO 60XW 60x/NA 1.2/WD 0.28 water immersion objective (Olympus,  
727 Hamburg, Germany). Fluorescence of GFP was collected between 500-540nm and  
728 mCherry emission was imaged between 580-620nm upon excitation with 488 and  
729 561nm argon laser lines, respectively. For FRET-FLIM measurements the PicoQuant  
730 advanced FCS/FLIM-FRET/rapidFLIM upgrade kit (PicoQuant, Berlin, Germany) was  
731 used, comprising a 485nm pulsed laser line for GFP excitation (pulse rate 40 MHz,  
732 laser driver: PDL 828 SEPIA II, laser: LDH-D-C-485), a Hybrid Photomultiplier  
733 Detector Assembly 40 to detect GFP fluorescence and a TimeHarp 260 PICO Time-  
734 Correlated Single Photon Counting module (resolution 25 ps) to measure photon life  
735 times. GFP fluorescence was imaged at the aequatorial plane of epidermis cells to  
736 capture GFP fluorescence at the cell periphery and possibly plasma membrane. For  
737 each interaction at least 10 cells were analysed in two replicates and a minimum of  
738 1000 photons of the brightest pixel were recorded. Decay data within a region of  
739 interest were fitted using an n-exponential reconvolution fit with model parameters  
740 n=3 and measured instrument response function.

## 741 **Acknowledgements**

742 This work was supported by research grants from the German research foundation  
743 (HU886/8 and SFB924) to RH. We are grateful to the TUM plant technology center  
744 for support in propagation of barley plants.

745

#### 746 **Conflict of interest**

747 The commercial use of RACB is regulated by patent WO 03020939.

748

#### 749 **Supplemental Data**

750 **Suppl. Fig. S1: Barley RIC157 shows limited sequence similarity to RIC1 from**  
751 ***Arabidopsis thaliana***

752 **Suppl. Fig. S2: RNA interference silencing efficiency**

753 **Suppl. Fig. S3: CRIB deletion and CRIB mutation in RIC157 prevents interaction**  
754 **with RACB in yeast**

755 **Suppl. Fig. S4: Protein stability in yeast**

756 **Suppl. Figure S5: Raciometric BiFC analyses and BiFC fusion protein stability**

757 **Suppl. Fig. S6: RIC157 is recruited to the cell periphery by activated RACB**

758 **Suppl. Fig. S7: RIC157, recruited to the cell periphery by activated RACB,**  
759 **colocalises with plasma membrane marker.**

760 **Suppl. Fig. S8: Barley RIC157 shows limited sequence similarity to RIC**  
761 **proteins from *Arabidopsis thaliana*.**

762 **Suppl. Table 1: Primers used in this study**

763

#### 764 **References**

765 **Akamatsu, A., Wong, H.L., Fujiwara, M., Okuda, J., Nishide, K., Uno, K., Imai, K.,**  
766 **Umemura, K., Kawasaki, T., Kawano, Y. and Shimamoto, K. (2013). An**  
767 **OsCEBiP/OsCERK1-OsRacGEF1-OsRac1 module is an essential early component**  
768 **of chitin-induced rice immunity. Cell Host Microbe 13, 465-476.**

769

770 **Ash, J., Wu, C., Larocque, R., Jamal, M., Stevens, W., Osborne, M., Thomas,**  
771 **D.Y. and Whiteway, M.** (2003). Genetic analysis of the interface between Cdc42p  
772 and the CRIB domain of Ste20p in *Saccharomyces cerevisiae*. *Genetics* **163**, 9-20.

773

774 **Aspenström, P.** (1999). Effectors for the Rho GTPases. *Curr. Opin. Cell Biol.* **11**, 95-  
775 102.

776

777 **Basu, D., Le, J., Zakharova, T., Mallery, E.L. and Szymanski, D.B.** (2008). A  
778 SPIKE1 signaling complex controls actin-dependent cell morphogenesis through the  
779 heteromeric WAVE and ARP2/3 complexes. *Proc. Natl. Acad. Sci. USA* **105**, 4044-  
780 4049.

781

782 **Berken, A., Thomas, C. and Wittinghofer, A.** (2005). A new family of RhoGEFs  
783 activates the Rop molecular switch in plants. *Nature* **436**, 1176-1180.

784

785 **Berken, A. and Wittinghofer, A.** (2008). Structure and function of Rho-type  
786 molecular switches in plants. *Plant Physiol. Biochem.* **46**, 380-393.

787

788 **Białas, A., Zess, E.K., De la Concepcion, J.C., Franceschetti, M., Pennington,**  
789 **H.G., Yoshida, K., Upson, J.L., Chanclud, E., Wu, C.-H., Langner, T., Maqbool,**  
790 **A., Varden, F.A., Derevnina, L., Belhaj, K., Fujisaki, K., Saitoh, H., Terauchi, R.,**  
791 **Banfield, M.J. and Kamoun, S.** (2018). Lessons in effector and NLR biology of  
792 plant-microbe systems. *Mol. Plant Microbe Interact.* **31**, 34-45.

793

794 **Boller, T. and Felix, G.** (2009). A renaissance of elicitors: perception of microbe-  
795 associated molecular patterns and danger signals by pattern-recognition receptors.  
796 *Annu. Rev. Plant Biol.* **60**, 379-406.

797



798 **Boulter, E., and Garcia-Mata, R.** (2010). RhoGDI: A rheostat for the Rho switch.  
799 *Small GTPases* **1**, 65-68.

800

801 **Brembu, T., Winge, P., Bones, A.M. and Yang, Z.** (2006). A RHOse by any other  
802 name: a comparative analysis of animal and plant Rho GTPases. *Cell Res.* **16**, 435-  
803 445.

804

805 **Burbelo, P.D., Drechsel, D. and Hall, A.** (1995). A conserved binding motif defines  
806 numerous candidate target proteins for both Cdc42 and Rac GTPases. *J. Biol. Chem.*  
807 **270**, 29071-29074.

808

809 **Chen, X. and Friml, J.** (2014). Rho-GTPase-regulated vesicle trafficking in plant cell  
810 polarity. *Biochem. Soc. Trans.* **42**, 212-218.

811

812 **Cool, R.H., Schmidt, G., Lenzen, C.U., Prinz, H., Vogt, D. and Wittinghofer, A.**  
813 (1999). The Ras mutant D119N is both dominant negative and activated. *Mol. Cell.*  
814 *Biol.* **19**, 6297-6305.

815

816 **Craddock, C., Lavagi, I. and Yang, Z.** (2012). New insights into Rho signaling from  
817 plant ROP/Rac GTPases. *Trends Cell Biol.* **22**, 492-501.

818

819 **Dangl, J.L., Horvath, D.M. and Staskawicz, B.J.** (2013). Pivoting the plant immune  
820 system from dissection to deployment. *Science* **341**, 746-751.

821

822 **Douchkov, D., Nowara, D., Zierold, U. and Schweizer, P.** (2005). A high-  
823 throughput gene-silencing system for the functional assessment of defense-related  
824 genes in barley epidermal cells. *Mol. Plant Microbe Interact.* **18**, 755-761.

825

826 **Edgar, C.** (2004). MUSCLE: multiple sequence alignment with high accuracy and  
827 high throughput. *Nucleic Acids Res.* **32**, 1792-1797.

828

829 **Engelhardt, S., Stam, R. and Hückelhoven, R.** (2018). Good riddance? Breaking  
830 disease susceptibility in the era of new breeding technologies. *Agronomy* **8**, 114.

831

832 **Feiguelman, G., Fu, Y. and Yalovsky, S.** (2018). ROP GTPases structure-function  
833 and signaling pathways. *Plant Physiol.* **176**, 57-79.

834

835 **Frantzeskakis, L., Kracher, B., Kusch, S., Yoshikawa-Maekawa, M., Bauer, S.,**  
836 **Pedersen, C., Spanu, P.D., Maekawa, T., Schulze-Lefert, P. and Panstruga, R.**  
837 (2018). Signatures of host specialisation and a recent transposable element burst in  
838 the dynamic one-speed genome of the fungal barley powdery pathogen. *BMC*  
839 *Genomics* **19**, 381.

840

841 **Fu, Y., Gu, Y., Zheng, Z., Wasteneys, G. and Yang, Z.** (2005). *Arabidopsis*  
842 interdigitating cell growth requires two antagonistic pathways with opposing action on  
843 cell morphogenesis. *Cell* **120**, 687-700.

844

845 **Fu, Y., Xu, T., Zhu, L., Wen, M. and Yang, Z.** (2009). A ROP GTPase signaling  
846 pathway controls cortical microtubule ordering and cell expansion in *Arabidopsis*.  
847 *Curr. Biol.* **19**, 1827-1832.

848

849 **Good, M.C., Zalatan, J.G. and Lim, W.A.** (2011). Scaffold proteins: Hubs for  
850 controlling the flow of cellular information. *Science* **332**, 680-686.

851

852 **Gu, Y., Fu, Y., Dowd, P., Li, S., Vernoud, V., Gilroy, S. and Yang, Z.** (2005). A Rho  
853 family GTPase controls actin dynamics and tip growth via two counteracting  
854 downstream pathways in pollen tubes. *J. Cell Biol.* **169**, 127-138.

855

856 **Gu, Y., Li, S., Lord, E.M. and Yang, Z.** (2006). Members of a novel class of  
857 *Arabidopsis* Rho guanine nucleotide exchange factors control Rho GTPase-  
858 dependent polar growth. *Plant Cell* **18**, 366-381.

859

860 **Hahn, M. and Mendgen, K.** (2001). Signal and nutrient exchange at biotrophic plant-  
861 fungus interfaces. *Curr. Opin. Plant Biol.* **4**, 322-327.

862

863 **Han, X. and Kahmann, R.** (2019). Manipulation of phytohormone pathways by  
864 effectors of filamentous pathogens. *Front. Plant Sci.* **10**, 822.

865

866 **Hazak, O., Bloch, D., Poraty, L., Sternberg, H., Zhang, J., Friml, J. and Yalovsky,**  
867 **S.** (2010). A rho scaffold integrates the secretory system with feedback mechanisms  
868 in regulation of auxin distribution. *PLoS Biol.* **8**, e1000282.

869

870 **He, Q., Naqvi, S., McLellan, H., Boevink, P.C., Champouret, N., Hein, I. and**  
871 **Birch, P.R.J.** (2018). Plant pathogen effector utilizes host susceptibility factor NLR1  
872 to degrade the immune regulator SWAP70. *Proc. Natl. Acad. Sci. USA* **115**, E7834-  
873 E7843.

874

875 **Higaki, T., Takigawa-Imamura, H., Akita, K., Kutsuna, N., Kobayashi, R.,**  
876 **Hasezawa, S. and Miura, T.** (2017). Exogenous cellulase switches cell interdigitation  
877 to cell elongation in an RIC1-dependent manner in *Arabidopsis thaliana* cotyledon  
878 pavement cells. *Plant Cell Physiol.* **58**, 106-119.

879

880 **Hoefle, C., Huesmann, C., Schultheiss, H., Börnke, F., Hensel, G., Kumlehn, J.**  
881 **and Hüchelhoven, R.** (2011). A barley ROP GTPase ACTIVATING PROTEIN  
882 associates with microtubules and regulates entry of the barley powdery mildew  
883 fungus into leaf epidermal cells. *Plant Cell* **23**, 2422-2439.

884

885 **Hoefle, C., McCollum, C. and Hückelhoven, R.** (2020). Barley ROP-Interactive  
886 Partner-a organizes into RAC1- and MICROTUBULE-ASSOCIATED ROP-GTPASE  
887 ACTIVATING PROTEIN 1-dependent membrane domains. *BMC Plant Biol.* **20**, 94.

888

889 **Hong, D., Jeon, B.W., Kim, S.Y., Hwang, J.-U. and Lee, Y.** (2016). The ROP2-  
890 RIC7 pathway negatively regulates light-induced stomatal opening by inhibiting  
891 exocyst subunit Exo70B1 in Arabidopsis. *New Phytol.* **209**, 624-635.

892

893 **Huesmann, C., Reiner, T., Hoefle, C., Preuss, J., Jurca, M.E., Domoki, M., Feher,  
894 A. and Hückelhoven, R.** (2012). Barley ROP binding kinase 1 is involved in  
895 microtubule organization and in basal penetration resistance to the barley powdery  
896 mildew fungus. *Plant Physiol.* **159**, 311-320.

897

898 **Hückelhoven, R. and Panstruga, R.** (2011). Cell biology of the plant-powdery  
899 mildew interaction. *Curr. Opin. Plant Biol.* **14**, 738-746.

900

901 **Inada, N. and Ueda, T.** (2014). Membrane trafficking pathways and their roles in  
902 plant-microbe interactions. *Plant Cell Physiol.* **55**, 672-686.

903

904 **Jørgensen, J.H. and Wolfe, M.** (1994). Genetics of powdery mildew resistance in  
905 barley. *Crit. Rev. Plant Sci.* **13**, 97-119.

906

907 **McKeen, W.E. and Rimmer, S.R.** (1973). Initial penetration process in powdery  
908 mildew infection of susceptible barley leaves. *Phytopathology* **63**, 1049-1053.

909

910 **Kawano, Y., Akamatsu, A., Hayashi, K., Housen, Y., Okuda, J., Yao, A.,  
911 Nakashima, A., Takahashi, H., Yoshida, H., Wong, H.L., Kawasaki, T. and**

912 **Shimamoto, K.** (2010). Activation of a Rac GTPase by the NLR family disease  
913 resistance protein Pit plays a critical role in rice innate immunity. *Cell Host Microbe* **7**,  
914 362-375.

915

916 **Kawano, Y., Fujiwara, T., Yao, A., Housen, Y., Hayashi, K. and Shimamoto, K.**  
917 (2014). Palmitoylation-dependent membrane localisation of the rice resistance  
918 protein Pit is critical for the activation of the small GTPase OsRac1. *J. Biol. Chem.*  
919 **289**, 19079-19088.

920

921 **Klahre, U., Becker, C., Schmitt, A.C. and Kost, B.** (2006). Nt-RhoGDI2 regulates  
922 Rac/Rop signaling and polar cell growth in tobacco pollen tubes. *Plant J.* **46**, 1018-  
923 1031.

924

925 **Koh, S., Andre, A., Edwards, H., Ehrhardt, D. and Somerville, S.** (2005).  
926 *Arabidopsis thaliana* subcellular responses to compatible *Erysiphe cichoracearum*  
927 infections. *Plant J.* **44**, 516-529.

928

929 **Kushnirov, V.V.** (2000). Rapid and reliable protein extraction from yeast. *Yeast* **16**,  
930 857-860.

931

932 **Kwaaitaal, M., Nielsen, M.E., Böhlenius, H. and Thordal-Christensen, H.** (2017).  
933 The plant membrane surrounding powdery mildew haustoria shares properties with  
934 the endoplasmic reticulum membrane. *J. Exp. Bot.* **68**, 5731-5743.

935

936 **Lavy, M., Bloch, D., Hazak, O., Gutman, I., Poraty, L., Sorek, N., Sternberg, H.**  
937 **and Yalovsky, S.** (2007). A novel ROP/RAC effector links cell polarity, root-meristem  
938 maintenance, and vesicle trafficking. *Curr. Biol.* **17**, 947-952.

939

940 **Lee, Y.J., Szumlanski, A., Nielsen, E. and Yang, Z.** (2008). Rho-GTPase-  
941 dependent filamentous actin dynamics coordinate vesicle targeting and exocytosis  
942 during tip growth. *J. Cell. Biol.* **181**, 1155-1168.

943

944 **Li, B. and Fields, S.** (1993). Identification of mutations in p53 that affect its binding to  
945 SV40 large T antigen by using the yeast two-hybrid system. *FASEB J.* **7**, 957-963.

946

947 **Li, C., Lu, H., Li, W., Yuan, M. and Fu, Y.** (2017). A ROP2-RIC1 pathway fine-tunes  
948 microtubule reorganization for salt tolerance in *Arabidopsis*. *Plant, Cell Environm.* **40**,  
949 1127-1142.

950

951 **Lin, D., Cao, L., Zhou, Z., Zhu, L., Ehrhardt, D., Yang, Z. and Fu, Y.** (2013). Rho  
952 GTPase signaling activates microtubule severing to promote microtubule ordering in  
953 *Arabidopsis*. *Curr. Biol.* **23**, 290-297.

954

955 **McCollum, C., Engelhardt, S. and Hückelhoven, R.** (2019): ROP INTERACTIVE  
956 PARTNER b interacts with the ROP GTPase RACB and supports fungal penetration  
957 into barley epidermal cells. bioRxiv 750265.

958

959 **Meller, N., Merlot, S. and Guda, C.** (2005). CZH proteins: a new family of Rho-  
960 GEFs. *J. Cell. Sci.* **118**, 4937-4946.

961

962 **Miklis, M., Consonni, C., Bhat, R.A., Lipka, V., Schulze-Lefert, P. and Panstruga,**  
963 **R.** (2007). Barley MLO modulates actin-dependent and actin-independent antifungal  
964 defense pathways at the cell periphery. *Plant Physiol.* **144**, 1132-1143.

965

966 **Mucha, E., Hoefle, C., Hückelhoven, R. and Berken, A.** (2010). RIP3 and  
967 AtKinesin-13A – a novel interaction linking Rho proteins of plants to microtubules.  
968 *Eur. J. Cell Biol.* **89**, 906-916.

969

970 **Nakashima, A., Chen, L., Thao, N.P., Fujiwara, M., Wong, H.L., Kuwano, M.,**  
971 **Umemura, K., Shirasu, K., Kawasaki, T. and Shimamoto, K.** (2008). RACK1  
972 functions in rice innate immunity by interacting with the Rac1 immune complex. *Plant*  
973 *Cell* **20**, 2265-2279.

974

975 **Nelson, B.K., Cai, X. and Nebenführ, A.** (2007). A multicolored set of in vivo  
976 organelle markers for co-localization studies in *Arabidopsis* and other plants. *Plant J.*  
977 **51**, 1126-1136.

978

979 **Nibau, C., Wu, H.M. and Cheung, A.Y.** (2006). RAC/ROP GTPases: 'hubs' for  
980 signal integration and diversification in plants. *Trends Plant Sci.* **11**, 309-315.

981

982 **Nottensteiner, M., Zechmann, B., McCollum, C., Hüchelhoven, R.** (2018). A  
983 Barley powdery mildew fungus non-autonomous retrotransposon encodes a peptide  
984 that supports penetration success on barley. *J. Exp. Bot.* **69**, 3745-3758.

985

986 **Opalski, K.S., Schultheiss, H., Kogel, K.H. and Hüchelhoven, R.** (2005). The  
987 receptor-like MLO protein and the RAC/ROP family G-protein RACB modulate actin  
988 reorganization in barley attacked by the biotrophic powdery mildew fungus *Blumeria*  
989 *graminis* f.sp. *hordei*. *Plant J.* **41**, 291-303.

990

991 **Ostertag, M., Stammler, J., Douchkov, D., Eichmann, R. and Hüchelhoven, R.**  
992 (2013). The conserved oligomeric Golgi complex is involved in penetration resistance  
993 of barley to the barley powdery mildew fungus. *Mol. Plant Pathol.* **14**, 230-240.

994

995 **Panstruga, R. and Dodds, P.N.** (2009). Terrific protein traffic: The mystery of  
996 effector protein delivery by filamentous plant pathogens. *Science* **324**, 748-750.

997

998 **Platre, M.P. et al.** (2019). Developmental control of plant Rho GTPase nano-  
999 organization by the lipid phosphatidylserine. *Science* **364**, 57-62.

1000

1001 **Qin, L., Zhou, Z., Li, Q., Zhai, C., Liu, L., Quilichini, T.D., Gao, P., Kessler, S.A.,**  
1002 **Jaillais, Y., Datla, R., Peng, G., Xiang, D. and Wei, Y.** (2020). Specific recruitment  
1003 of phosphoinositide species to the plant-pathogen interfacial membrane underlies  
1004 *Arabidopsis* susceptibility to fungal infection. *Plant Cell* **32**, 1665-1688.

1005

1006 **Reiner, T., Hoefle, C. and Hückelhoven, R.** (2016). A barley SKP1-like protein  
1007 controls abundance of the susceptibility factor RACB and influences the interaction of  
1008 barley with the barley powdery mildew fungus. *Mol. Plant Pathol.* **17**, 184-195.

1009

1010 **Ren, H., Dang, X., Cai, X., Yu, P., Li, Y., Zhang, S., Liu, M., Chen, B. and Lin, D.**  
1011 (2017). Spatio-temporal orientation of microtubules controls conical cell shape in  
1012 *Arabidopsis thaliana* petals. *PLoS Genet.* **13**, e1006851.

1013

1014 **Schaefer, A., Höhner, K., Berken, A. and Wittinghofer, A.** (2011). The unique  
1015 plant RhoGAPs are dimeric and contain a CRIB motif required for affinity and  
1016 specificity towards cognate small G proteins. *Biopolymers* **95**, 420-433.

1017

1018 **Scheler, B., Schnepf, V., Galgenmüller, C., Ranf, S. and Hückelhoven, R.** (2016).  
1019 Barley disease susceptibility factor RACB acts in epidermal cell polarity and  
1020 positioning of the nucleus. *J. Exp. Bot.* **67**, 3263-3275.

1021

1022 **Schnepf, V., Vlot, C.A., Kugler, K. and Hückelhoven, R.** (2018). Barley  
1023 susceptibility factor RACB modulates transcript levels of signalling protein genes in  
1024 compatible interactions with *Blumeria graminis* f.sp. *hordei*. *Mol. Plant Pathol.* **19**,  
1025 393-404.

1026



1027 **Schultheiss, H., Dechert, C., Kogel, K.-H. and Hüchelhoven R.** (2002). A small  
1028 GTP-binding host protein is required for entry of powdery mildew fungus into  
1029 epidermal cells of barley. *Plant Physiol.* **128**, 1447-1454.

1030

1031 **Schultheiss, H., Dechert, C., Kogel, K.-H. and Hüchelhoven, R.** (2003). Functional  
1032 analysis of barley RAC/ROP G-protein family members in susceptibility to the  
1033 powdery mildew fungus. *Plant J.* **36**, 589-601.

1034

1035 **Schultheiss, H., Preuss, J., Pircher, T., Eichmann, R. and Hüchelhoven, R.**  
1036 (2008). Barley RIC171 interacts with RACB *in planta* and supports entry of the  
1037 powdery mildew fungus. *Cell. Microbiol.* **10**, 1815-1826.

1038

1039 **Schulze-Lefert, P. and Vogel, J.** (2000). Closing the ranks to attack by powdery  
1040 mildew. *Trends in Plant Science* **5**, 343-348.

1041

1042 **Schweizer, P., Christoffel, A. and Dudler, R.** (1999). Transient expression of  
1043 members of the germin-like gene family in epidermal cells of wheat confers disease  
1044 resistance. *Plant J.* **20**, 541-552.

1045

1046 **Spanu, P.D. et al.** (2010). Genome expansion and gene loss in powdery mildew  
1047 fungi reveal tradeoffs in extreme parasitism. *Science* **330**, 1543-1546.

1048

1049 **Stukenbrock, E.H., McDonald, B.A.** (2009) Population genetics of fungal and  
1050 oomycete effectors involved in gene-for-gene interactions. *Mol Plant Microbe*  
1051 *Interact.*

1052 22, 371-380.

1053

1054 **Sugiyama, Y., Nagashima, Y., Wakazaki, M., Sato, M., Toyooka, K., Fukuda, H.**  
1055 **and Oda, Y.** (2019). A Rho-actin signaling pathway shapes cell wall boundaries in  
1056 *Arabidopsis* xylem vessels. *Nat. Commun.* **10**, 468.

1057

1058 **Vickers, C.E., Xue, G.P. and Gresshoff, P.M.** (2003). A synthetic xylanase as a  
1059 novel reporter in plants. *Plant Cell Rep.* **22**, 135-140.

1060

1061 **Voegelé, R.T., Struck, C., Hahn, M. and Mendgen, K.** (2001). The role of haustoria  
1062 in sugar supply during infection of broad bean by the rust fungus *Uromyces fabae*.  
1063 *Proc. Natl. Acad. Sci. USA* **98**, 8133-8138.

1064

1065 **Waadt, R., Schmidt, L.K., Lohse, M., Hashimoto, K., Bock, R. and Kudla, J.**  
1066 (2008). Multicolor bimolecular fluorescence complementation reveals simultaneous  
1067 formation of alternative CBL/CIPK complexes *in planta*. *Plant J.* **56**, 505-516.

1068

1069 **Walter, M., Chaban, C., Schütze, K., Batistic, O., Weckermann, K., Näke, C.,**  
1070 **Blazevich, D., Grefen, C., Schumacher, K., Oecking, C., Harter, K. and Kudla, J.**  
1071 (2004). Visualization of protein interactions in living plant cells using bimolecular  
1072 fluorescence complementation. *Plant J.* **40**, 428-438.

1073

1074 **Wang, Q., Li, Y., Ishikawa, K., Kosami, K.I., Uno, K., Nagawa, S., Tan, L., Du, J.,**  
1075 **Shimamoto, K. and Kawano, Y.** (2018). Resistance protein Pit interacts with the  
1076 GEF OsSPK1 to activate OsRac1 and trigger rice immunity. *Proc. Natl. Acad. Sci.*  
1077 *USA* **115**, E11551-E11560.

1078

1079 **Wicker, T. et al.** (2013). The wheat powdery mildew genome shows the unique  
1080 evolution of an obligate biotroph. *Nat. Genet.* **45**, 1092-1096.

1081

1082 **Wu, G., Gu, Y., Li, S. and Yang, Z.** (2001). A genome-wide analysis of Arabidopsis  
1083 Rop-interactive CRIB motif-containing proteins that act as ROP GTPase targets.  
1084 *Plant Cell* **13**, 2841-2856.

1085

1086 **Wu, H., Hazak, O., Cheung, A.Y. and Yalovsky, S.** (2011). RAC/ROP GTPases and  
1087 auxin signaling. *Plant Cell* **23**, 1208-1218.

1088

1089 **Yalovsky, S.** (2015). Protein lipid modifications and the regulation of ROP GTPase  
1090 function. *J. Exp. Bot.* **66**, 1617-1624.

1091

1092 **Yalovsky, S., Bloch, D., Sorek, N. and Kost, B.** (2008). Regulation of membrane  
1093 trafficking, cytoskeleton dynamics, and cell polarity by ROP/RAC GTPases. *Plant*  
1094 *Physiol.* **147**, 1527-1543.

1095

1096 **Yamaguchi, K. and Kawasaki, T.** (2012). Function of Arabidopsis SWAP70 GEF in  
1097 immune response. *Plant Signal Behav.* **7**, 465-468.

1098

1099 **Yamaguchi, K., Imai, K., Akamatsu, A., Mihashi, M., Hayashi, N., Shimamoto, K.**  
1100 **and Kawasaki, T.** (2012). SWAP70 functions as a Rac/Rop guanine nucleotide-  
1101 exchange factor in rice. *Plant J.* **70**, 389-397.

1102

1103 **Zeke, A., Lukacs, M., Lim, W.A. and Remenyi, A.** (2009). Scaffolds: interaction  
1104 platforms for cellular signalling circuits. *Trends Cell Biol.* **19**, 364-374.

1105

1106 **Zhang, Y., Xiong, Y., Liu, R., Xue, H.W. and Yang, Z.** (2019). The Rho-family  
1107 GTPase *OsRAC1* controls rice grain size and yield by regulating cell division. *Proc.*  
1108 *Natl. Acad. Sci. USA* **116**, 16121-16126.

1109

1110 **Zhou, Z., Shi, H., Chen, B., Zhang, R., Huang, S. and Fu, Y.** (2015). Arabidopsis  
1111 RIC1 severs actin filaments at the apex to regulate pollen tube growth. *Plant Cell* **27**,  
1112 1140-1161.

1113

1114 **Zhou, Z., Pang, Z., Zhao, S., Zhang, L., Lv, Q., Yin, D., Li, D., Xue, L., Zhao, X., Li,**  
1115 **X., Wang, W. and Zhu, L.** (2019). Importance of OsRAC1 and RAI1 in signalling of  
1116 nucleotide-binding site leucine-rich repeat protein-mediated resistance to rice blast  
1117 disease. *New Phytol.* **223**, 828-838.

1118

## 1119 **Figures**

1120

1121 **Figure 1: Barley RIC proteins alignment.** Multiple alignment  
1122 (<https://www.ebi.ac.uk/Tools/msa/muscle>, Edgar 2004; illustrated using Jalview  
1123 2.11.0 software) of predicted barley (*Hordeum vulgare*, Hv) proteins harboring CRIB  
1124 domain (underlined). Intensity of blue coloured amino acids represents level of  
1125 conservation (higher intensity = more conserved). CRIB domain consensus  
1126 sequence of barley RIC proteins is indicated by coloured amino acid sequence above  
1127 the alignment (<http://meme-suite.org/tools/meme>).

1128

1129

1130 **Figure 2: RIC157 increases susceptibility in a RACB-dependent manner.**

1131 Epidermal cells of 7 day old primary barley leaves were transiently transformed by  
1132 particle bombardment with either (A) an overexpression construct of RIC157, (B) a  
1133 RNA interference construct of RIC157, (C) simultaneously with an overexpression  
1134 construct of RIC157 and a RNA interference construct of RACB or (D) an  
1135 overexpression construct of RIC157 N-terminally tagged with GFP. Empty  
1136 overexpression or RNA interference plasmids were used as controls (-ve). The  
1137 penetration efficiency of *Bgh* into transformed barley epidermal cells was analysed  
1138 48h after inoculation with fungal spores. Values are shown as mean of at least 3  
1139 independent biological replicates, relative to the mean of the control set as 100%. \*\*  
1140 indicates significance  $P < 0.01$ , Student's t-test.

1141

1142

1143 **Figure 3: RIC157 interacts directly with RACB in yeast and in planta.** A) Yeast-2-

1144 Hybrid indicates direct interaction between RIC157 and RACB in yeast. Yeast strain  
1145 AH109 was transformed with indicated bait and prey fusion constructs. Overnight  
1146 cultures of yeast transformants were dropped onto Complete Supplement Medium  
1147 plates either lacking leucine and tryptophan (LW) or lacking leucine, tryptophan and  
1148 adenin (LWAde) and incubated at 30°C. Growth on LWAde medium indicates  
1149 interaction between bait and prey fusion proteins. -ve denotes empty prey and bait  
1150 plasmid. Photos were taken 2 days (LW) and 7 days (LWAde), respectively, after  
1151 dropping. B) Quantification of FLIM analysis confirms direct protein-protein interaction  
1152 between RIC157 and RACB *in planta*. GFP lifetime in barley epidermal cells

1153 transiently co-expressing indicated constructs was investigated at the aequatorial  
1154 plane 2d after transformation via particle bombardment. Graph shows result of 2  
1155 independent biological replicates. \*\*\*\* indicates significance  $P < 0.0001$ , Student's t-  
1156 test.

1157

1158

1159 **Figure 4: RIC157 localisation is affected by RACB-activation status.** Confocal  
1160 scanning microscopy of barley epidermal cells 1d after transformation via particle  
1161 bombardment. A) GFP-RIC157 localises to the cytoplasm, but not the nucleus (upper  
1162 row) and is recruited to the cell periphery exclusively by mCherry-CARACB(G15V),  
1163 but not by mCherry-RACB or mCherry-DNRACB(D121N). B) Simultaneous RNA  
1164 interference-mediated silencing of RACB attenuates RIC157 recruitment to the cell  
1165 periphery. Arrows indicate cytoplasmic strands, arrow heads point towards GFP  
1166 fluorescence accumulation at cell periphery. Microscopy pictures show maximum  
1167 projections of at least 15 optical sections taken at 2 $\mu$ m increments. Bar = 50 $\mu$ m.

1168

1169

1170 **Figure 5: RIC157 is recruited to penetration site where it colocalises with**  
1171 **activated RACB.** Confocal laser scanning microscopy of epidermal cells 1d after  
1172 transformation via particle bombardment and 18-24h after inoculation with *Bgh*. Cells  
1173 in A) and B) show successful fungal penetration due to haustorium formation (h). A)  
1174 Transient co-expression of GFP-CARACB(G15V) and mCherry-RIC157. Area in  
1175 white square is enlarged in lower panel. S = spore; Bar = 30 $\mu$ m. B) Transient co-  
1176 expression of CFP-CARACB(G15V) and GFP-RIC157. Cytosolic mCherry was  
1177 expressed to distinguish RIC157 and CARACB(G15V) localisation from cytoplasm at  
1178 penetration site. Bar = 20 $\mu$ m. Arrows indicate approximate position of the haustorial  
1179 neck. Contrast of images was equally slightly enhanced. Arrows indicate haustorial  
1180 neck close to fungal penetration site.

1181

1182

1183 **Suppl. Fig. S1: Barley RIC157 shows limited sequence similarity to barley**  
1184 **RIC168 and RIC171, but also to RIC proteins from *Arabidopsis thaliana* and**  
1185 ***Oryza sativa*.** Primary sequences of RIC proteins (schematically shown in top part of  
1186 the figure) were analysed for domain homologies using MEME online software  
1187 (<http://meme-suite.org/tools/meme>). Consensus sequence of the four most similar  
1188 motifs are shown below. Underlined sequence denotes CRIB domain. Hv = *Hordeum*  
1189 *vulgare*, At = *Arabidopsis thaliana*, Os = *Oryza sativa*.

1190

1191

1192 **Suppl. Fig. S2: RNA interference-mediated silencing efficiency.** Epidermal cells  
1193 of 7d old barley primary leaves were transiently transformed via particle  
1194 bombardment with overexpression constructs of GFP fusions of RIC157 (A) and  
1195 RACB (B) alone or together with RNAi silencing constructs. A construct to express  
1196 cytosolic mCherry was simultaneously co-delivered for transformation efficiency and  
1197 fluorescence quantification purposes. Microscopy images are maximum projections  
1198 of at least 15 optical sections taken at 2µm increments. Bars = 50µm. Each graph  
1199 shows the mean of GFP fluorescence as percentage of mCherry fluorescence per  
1200 transformed cell (whole cell area was taken as region of interest for measuring  
1201 fluorescence intensity). Dots represent single measured cells. \*\*\*\* indicates  
1202 significance  $P < 0.0001$

1203

1204

1205 **Suppl. Fig. S3: CRIB deletion and CRIB mutation in RIC157 prevents interaction**  
1206 **with RACB in yeast.** Yeast strain AH109 was transformed with indicated bait and  
1207 prey fusion constructs. Overnight cultures of yeast transformants were dropped onto  
1208 Complete Supplement Medium plates either lacking leucine and tryptophan (LW) or  
1209 lacking leucine, tryptophan and adenin (LWAde) and incubated at 30°C. Growth on  
1210 LWAde medium indicates interaction between bait and prey fusion proteins. –ve  
1211 denotes empty prey and bait plasmid. Photos were taken 2 days (LW) and 7 days  
1212 (LWAde), respectively, after dropping.

1213

1214

1215 **Suppl. Fig. S4: Protein stability in yeast.** Immunoblots probed with  $\alpha$ -cMyc to  
1216 detect RACB variants fused to GAL4 binding domain (BD; bait) encoded on pGBKT7  
1217 and  $\alpha$ -HA to detect RIC157 variants fused to GAL4 activation domain (AD; prey)  
1218 encoded on pGADT7 after transformation of yeast strain AH109. Total yeast protein  
1219 was extracted as described in Experimental Procedures. Molecular weight is  
1220 indicated in kiloDalton (kDA). Ponceau S staining shows protein loading. Stable  
1221 expression of RIC157 variants fused to GAL4 activation domain could not be  
1222 detected in immunoblots (arrow indicates expected bandsize).

1223

1224

1225 **Suppl. Figure S5: Ratiometric BiFC analyses and BiFC fusion protein stability.**

1226 A) Barley epidermal cells were transiently transformed with indicated constructs  
1227 encoding for BiFC fusion proteins. Cytosolic mCherry expression was used in each  
1228 sample as transformation marker and to quantify reconstituted YFP fluorescence  
1229 ratiometrically. The whole cell area was taken as region of interest. Graph shows the  
1230 mean of the YFP/mCherry fluorescence ratio, taken from at least 20 cells (shown as  
1231 dots. \*\*\*\* indicates significance  $P < 0.0001$ , \*\* indicates significance  $P < 0.01$   
1232 Student's t-test. B) Barley mesophyll protoplasts were prepared and transformed with  
1233 BiFC constructs as described in Experimental procedures. To confirm stable *in planta*  
1234 expression, immunoblots were probed with  $\alpha$ -HA to detect YFPc-RACB fusion  
1235 proteins and  $\alpha$ -cMyc to detect YFPn-RIC157 fusion proteins. Ponceau S staining  
1236 shows equal protein loading. C) BiFC shows close proximity between RIC157 and  
1237 RACB *in planta*. Barley epidermal cells transiently co-expressing split-YFP fusion  
1238 protein combinations and mCherry as cytosolic transformation marker after particle  
1239 bombardment transformation. 2d after transformation, YFP fluorescence  
1240 reconstitution was analysed via Confocal laser scanning microscopy. Shown are  
1241 maximum projections of at least 15 optical sections taken at 2 $\mu$ m increments. Bars =  
1242 50 $\mu$ m.

1243

1244

1245

1246

1247 **Suppl. Fig. S6: RIC157 is recruited to the cell periphery by activated RACB.**

1248 Confocal laser scanning microscopy of barley epidermal cells 1d after transient



1249 transformation via particle bombardment. GFP-RIC157 localises to the cytoplasm,  
1250 but not the nucleus and is recruited to the cell periphery exclusively by non-tagged  
1251 CARACB(G15V), but not DNRACB(D121N). A construct for cytosolic mCherry  
1252 expression was simultaneously used to check transformation efficiency. Arrows  
1253 indicate cytoplasmic strands, arrow heads point towards GFP fluorescence  
1254 accumulation at cell periphery. Microscopy pictures show maximum projections of at  
1255 least 15 optical sections taken at 2µm increments. Bar = 50µm.

1256

1257

1258 **Suppl. Fig. S7: RIC157, recruited to the cell periphery by activated RACB,**  
1259 **colocalises with plasma membrane marker.** Confocal laser scanning microscopy  
1260 of barley epidermal cells 1d after transient transformation via particle bombardment  
1261 to express GFP-RIC157, red-fluorescent plasma membrane marker pm-rk (Nelson *et*  
1262 *al.*, 2007) and non-tagged CARACB(G15V). Microscopy pictures show A) maximum  
1263 projections of at least 15 optical sections taken at 2µm increments to visualize global  
1264 recruitment of GFP-RIC157 to the cell periphery in the presence of activated RACB  
1265 or B) and C) a single optical section to confirm specific colocalisation of GFP-RIC157  
1266 with plasma membrane marker pm-rk. B) and C) show overlay analysis of both  
1267 fluorescences in the absence or presence of overexpressed CARACB(G15V), either  
1268 via magnification (inset in upper panel) or via graphical visualization of fluorescence  
1269 signal intensities (lower panel) measured over a region of interest (white line in  
1270 middle panel). Bar = 50µm.

1271

1272

1273

1274

1275 **Suppl. Fig. S8: Barley RIC157 shows limited sequence similarity to RIC**  
1276 **proteins from *Arabidopsis thaliana*.** Primary sequences of RIC proteins  
1277 (schematically shown in top part of the figure) were analysed for domain homologies  
1278 using MEME online software (<http://meme-suite.org/tools/meme>). Consensus  
1279 sequence of the four most similar motifs are shown below. Underlined sequence  
1280 denotes CRIB domain. Hv = *Hordeum vulgare*, At = *Arabidopsis thaliana*.

1281

1282 **Suppl. Table 1: Primers used in this study**

| Primer name           | Gene (construct)                      | Sequence                                                               |
|-----------------------|---------------------------------------|------------------------------------------------------------------------|
| RIC157_GW_for         | <i>RIC157</i>                         | 5'-AAAAAGCAGGCTCACAAATGGCGGTAAAGATGAAGGG-3'                            |
| RIC157_GW_rev+STOP    | <i>RIC157</i>                         | 5'-<br>AGAAAGCTGGGTCAACCGCTCCGGATCAGACGACTCGAACCCCTCTT<br>TGC-3'       |
| RIC157delCRIB_for     | <i>RIC157ΔCRIB</i>                    | 5'-GCTCAAAGGAGCATGAGATGGAATTGGGCACCAGTGACACATC-<br>3'                  |
| RIC157delCRIB_rev     | <i>RIC157ΔCRIB</i>                    | 5'-CACTGGTGCCCAATTCCATCTCATGCTCCTTTGAGC-3'                             |
| CRIB157H37&40Y_for    | <i>RIC157-H37-40Y</i>                 | 5'-<br>CCTACAGATGTAAAGTATGTGGCTTACATAGTTTGGGCACCAGTGA<br>CACATCTCC-3'  |
| CRIB157H37&40Y_rev    | <i>RIC157-H37-40Y</i>                 | 5'-<br>GGAGATGTGCTACTGGTGCCCAAACCTATGTAAGCCACATACTTTAC<br>ATCTGTAGG-3' |
| attB1                 | <i>attB1</i>                          | 5'-GGGGACAAGTTTGTACAAAAAGCAGGCTCACAA-3'                                |
| attB2                 | <i>attB2</i>                          | 5'-GGGGACCACTTTGTACAAGAAAGCTGGGTCAACCG-3'                              |
| RIC157_RNAi_NotI_for  | <i>RIC157 RNAi</i>                    | 5'-AATTGCGGCCCAAGATGAAGGGAATCTTCAAAGGGC -3'                            |
| RIC157_RNAi_XbaI_rev  | <i>RIC157 RNAi</i>                    | 5'-AATTTCTAGAACGCCGTGCGAAGGAGGCCCTCGACC -3'                            |
| RIC157_RNAi_EcoRI_for | <i>RIC157 RNAi</i>                    | 5'-AATTGAATTCTTGGGCACCAGTGACACATCTCC-3'                                |
| RIC157_RNAi_EcoRI_rev | <i>RIC157 RNAi</i>                    | 5'-AATTGAATTCTTCCATCTCATGCTCCTTTTGGAGC-3'                              |
| RIC157_BamHI_for      | <i>RIC157</i>                         | 5'-AATTGGATCCATGGCGGTAAAGATGAAGGGAATC-3'                               |
| RIC157_KpnI_rev       | <i>RIC157</i>                         | 5'-AATTGGTACCCTAGACGACTCGAACCCCTCTTTGC-3'                              |
| RIC157_for            | <i>RIC157</i>                         | 5'-ATGGCGGTAAAGATGAAGG-3'                                              |
| RIC157_rev            | <i>RIC157</i>                         | 5'-GACGACTCGAACCCCTCTTTGC-3'                                           |
| RACB_D121N_fw         | <i>DNRACB(D121N)</i>                  | 5'-CTCGTGGGAACAAAGCTTAATCTTCGAGATGACAAG-3'                             |
| RACB_D121N_rv         | <i>DNRACB(D121N)</i>                  | 5'-CTTGTCATCTCGAAGATTAAGCTTTGTTCCACGAG-3'                              |
| RACB_GW_for           | <i>RACB</i>                           | 5'-AAAAAGCAGGCTCACAAATGAGCGCGTCCAGGTTTATAAAGTGC-3'                     |
| RACB_GW_rev           | <i>RACB</i>                           | 5'-<br>AGAAAGCTGGGTCAACCGCTCCGGACAAGATGGAGCAAGCCCCC-<br>3'             |
| HvUBC2_fwd            | <i>Ubiquitin conjugating enzyme 2</i> | 5'-TCTCGTCCCTGAGATTGCCACAT-3'                                          |
| HvUBC2_rev            | <i>Ubiquitin conjugating enzyme 2</i> | 5'-TTTCTCGGGACAGCAACACAATCTTCT-3'                                      |
| delCSIL_for           | <i>RACBΔCSIL</i>                      | 5'-<br>GAAGAAAAAGGCGCAGAGGGGGGCTTGATCCATCTTGTAGTCCGGA<br>GGCGGTG-3'    |
| delCSIL_rev           | <i>RACBΔCSIL</i>                      | 5'-<br>CACCGCTCCGACTACAAGATGGATCAAGCCCCCTCTGCGCCTT<br>TTCTTC-3'        |
| GW_RfA_mCherry-F      | <i>mCherry</i>                        | 5'-GCTGTACAAGATCACAAAGTTTGTACAAAAAGCTG-3'                              |
| GW_RfA_meGFP-F        | <i>meGFP</i>                          | 5'-GCTGTACAAAATCACAAAGTTTGTACAAAAAGCTG-3'                              |
| GW_RfA_Xba-R          | <i>RfA</i>                            | 5'-<br>TGCCTGCAGGTGCGACTCTAGAATCACCCTTTGTACAAGAAAGCTG-3'               |

|                   |                |                                                         |
|-------------------|----------------|---------------------------------------------------------|
| GW_Xba_RfB-F      | <i>RfB</i>     | 5'-<br>GGTACCCGGGGATCCTCTAGAATCAACAAGTTTGTACAAAAAGCT-3' |
| GW_RfB-R          | <i>RfB</i>     | 5'-TGCTCACCATATCAACCACTTTGTACAAGAAAGCT-3'               |
| meGFP-STP-F       | <i>meGFP</i>   | 5'-AGTGTTGATATGGTGAGCAAGGGCGAGG-3'                      |
| mCherry-STP-F     | <i>mCherry</i> | 5'-AGTGTTGATATGGTGAGCAAGGGCGAGG-3'                      |
| XFP-noSTP_Xba-F   | <i>XFP</i>     | 5'-GGTACCCGGGGATCCTCTAGAATGGTGAGCAAGGGCGAGG-3'          |
| XFP-noSTP-R       | <i>XFP</i>     | 5'-AACTTGTGATCTTGTACAGCTCGTCCATGCC-3'                   |
| meGFP-noSTP-R     | <i>meGFP</i>   | 5'-AACTTGTGATTTTGTACAGCTCGTCCATGCC-3'                   |
| mCherry-STP_Xba-R | <i>mCherry</i> | 5'-TGCCTGCAGGTCGACTCTAGATTACTTGTACAGCTCGTCCATGCC-<br>3' |
| meGFP-STP_Xba-R   | <i>meGFP</i>   | 5'-TGCCTGCAGGTCGACTCTAGATTATTTGTACAGCTCGTCCATGCC-<br>3' |

1283

|          |   |                                                                                   |    |
|----------|---|-----------------------------------------------------------------------------------|----|
| HvRIC163 | 1 | MKDRRAGAGFPFSIGCMSQSAVAVADPLEKKPMPPPPAQQQADTPSSSTTAATTQERSAGEESGEDKARNAAASG-IVSAG | 80 |
| HvRIC153 | 1 | -----MASISTDDAAPTSHVDAPVPVATGDHEEAAGVVGKGTASAEQAAARRDVFLLAG                       | 54 |
| HvRIC170 | 1 | -----MKG                                                                          | 3  |
| HvRIC194 | 1 | -----MGSREQQRGRDRFIVIPFSSTCRSAASVDIVQSKKPQGAGGGGEGTSAAAVVRPAKG-ESLSL              | 63 |
| HvRIC236 | 1 | -----MST-KMKKG                                                                    | 8  |
| HvRIC157 | 1 | -----MA-VKMKG                                                                     | 7  |
| HvRIC171 | 1 | -----MASN-YKMKG                                                                   | 9  |
| HvRIC168 | 1 | -----MA-YKMKG                                                                     | 7  |

IGPTDVKHVAHIG

|          |    |                                                                                  |     |
|----------|----|----------------------------------------------------------------------------------|-----|
| HvRIC163 | 81 | VQRL LKGIKT----FFAAYDGEEDDEAEIVIGFPTDVQHVGHIGWDGIN-----                          | 128 |
| HvRIC153 | 55 | IRKLIKSFRLTH-IFEMYEDGDEEDDDDIQIGFPTDVEHVAHIGLDGSS-----SVA----                    | 108 |
| HvRIC170 | 4  | L---LKGLRYISQ-IFDP-----KEP--EIQIGAPTDVKHVAHIGWDNNS-----VANPAWMSEFKAQPGASGSGGP    | 64  |
| HvRIC194 | 64 | VARL LRGFKNLSHQIFAVYDEDEDEEPE--EMVIGLPTDVKHVAHIGWDGST---STTSSVRSW-----NRAAPP     | 129 |
| HvRIC236 | 9  | I---LRPFYFSN-IDA-----KEQ--DMQIGFPTDVKHVAHIGWDGSPVNPKEKEAGAPSWMKDYHSAPLDSASFRS    | 76  |
| HvRIC157 | 8  | I---FKGLRIFSH-MFAA-----QKEH--EMEIGFPTDVKHVAHIGLGTSD-----TSPSWMNEFKSSE-DLSAGSL    | 67  |
| HvRIC171 | 10 | F---FKGFKIISQ-IFAA-----KEQ--EMVIGRPTDVKHVAHIGWSSST-PGTLTGNASPSWMNVEGSS-DFS--SM   | 73  |
| HvRIC168 | 8  | V---FKGLRVITQ-IFVV-----KEQ--EMEIGYPI DVKHVAHIGWDSPT--GSAATSPTPSWMNDMKGTP-DIS--TL | 70  |

## CRIB

|          |     |                                                                                   |     |
|----------|-----|-----------------------------------------------------------------------------------|-----|
| HvRIC163 | 129 | -----KVGGMVGAFLSP-----                                                            | 140 |
| HvRIC153 | 109 | -----SLRGMDGARELLSLS-----                                                         | 123 |
| HvRIC170 | 65  | EGAEQPGGGGGGAGKAE---QSEAKPRRTRGKGS GGAEGKRDVSRRP-----AKTEGSAE                     | 117 |
| HvRIC194 | 130 | GTTAPAAASASTS-----ASASSSSAAPPQPQA-----                                            | 157 |
| HvRIC236 | 77  | DRGGSAAASNPWASQEIVLDGAGLGDNSFRDTKSEAGGIEVTAGDSPSPGTRRSRRNRSRGSDTSSMDVTTGITDTSEKKE | 157 |
| HvRIC157 | 68  | STAEQSRQTSWTSDFEP-----ARSMLPTEINFDRP-----AQE                                      | 103 |
| HvRIC171 | 74  | GYFAPSAGTSWTSQDFEQHHQPPRDMLPLG IASEITGEDVAAAPYDPV-----                            | 122 |
| HvRIC168 | 71  | SNSGPSTGTSWSQDFDH---PRDISAYGII--PENSSPGATPYDIP-----                               | 113 |

|          |     |                                                                                     |     |
|----------|-----|-------------------------------------------------------------------------------------|-----|
| HvRIC163 | 141 | ----SSLSLR--QLEIAMDPGASTTTCIN-----                                                  | 163 |
| HvRIC153 | 124 | ----TNISLH--QFEFAMASIAAHDRSS-----AAITASP-----                                       | 153 |
| HvRIC170 | 118 | AGEGDAAAPKQ-RRRKSKTAGGASGGRSK-----SGSGGAASDPEAAKSASAEADDDGR-----                    | 170 |
| HvRIC194 | 158 | --QPPSLSAR--QFELAMAAQASAAATTS-----TSGAARRHRHYS-----                                 | 194 |
| HvRIC236 | 158 | KAKKGTRKNR--KKDKDKATEDTAGSTCQDLPAVPKKSNNRRKNKGSSEGGSGASTKDGGGVPEEGTTPLTLVAEEEEKDHEL | 236 |
| HvRIC157 | 104 | SSSCP PRGPRKARRKKTRTSSPTSSARSS-----SSRSRASFAFDDFSESQRGVRVV-----                     | 157 |
| HvRIC171 | 123 | --RPPPRKTR--RKKKT VVGSLVNSSVTN-----DSSASAS--TVATRVD AIDTNSVIS-----                  | 171 |
| HvRIC168 | 114 | --KPPRRPR--RKKSSKNSSPTASTRSS-----RSSRSRSKGSLSSTTPDTIGANDTQREIQIL-----               | 168 |

**A**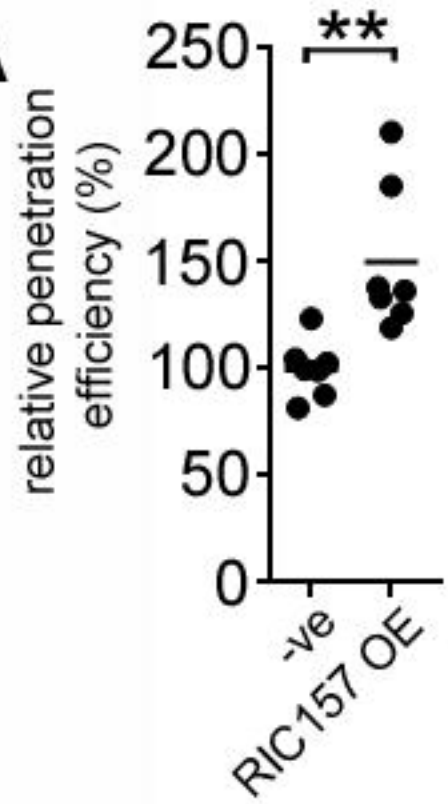**B**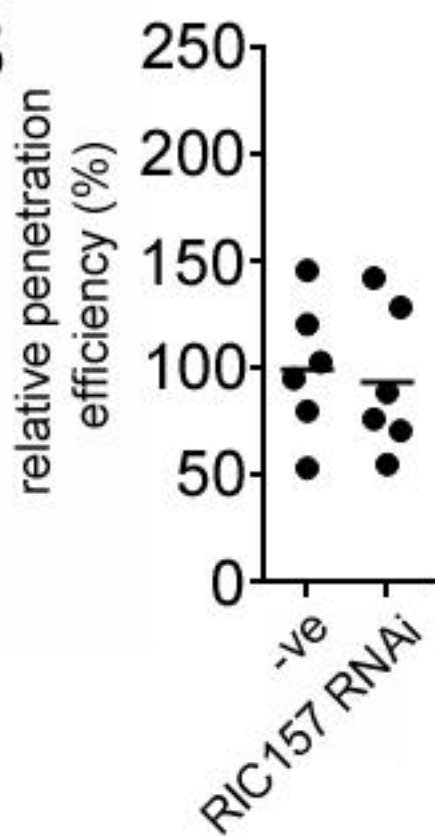**C**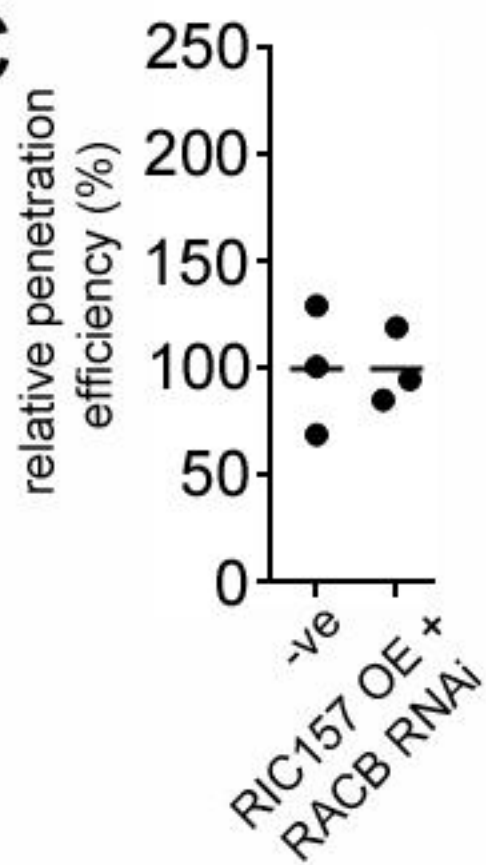**D**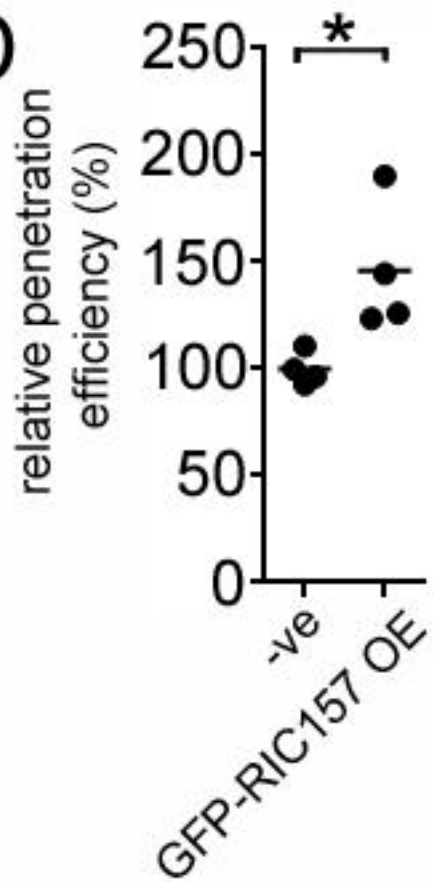

**A**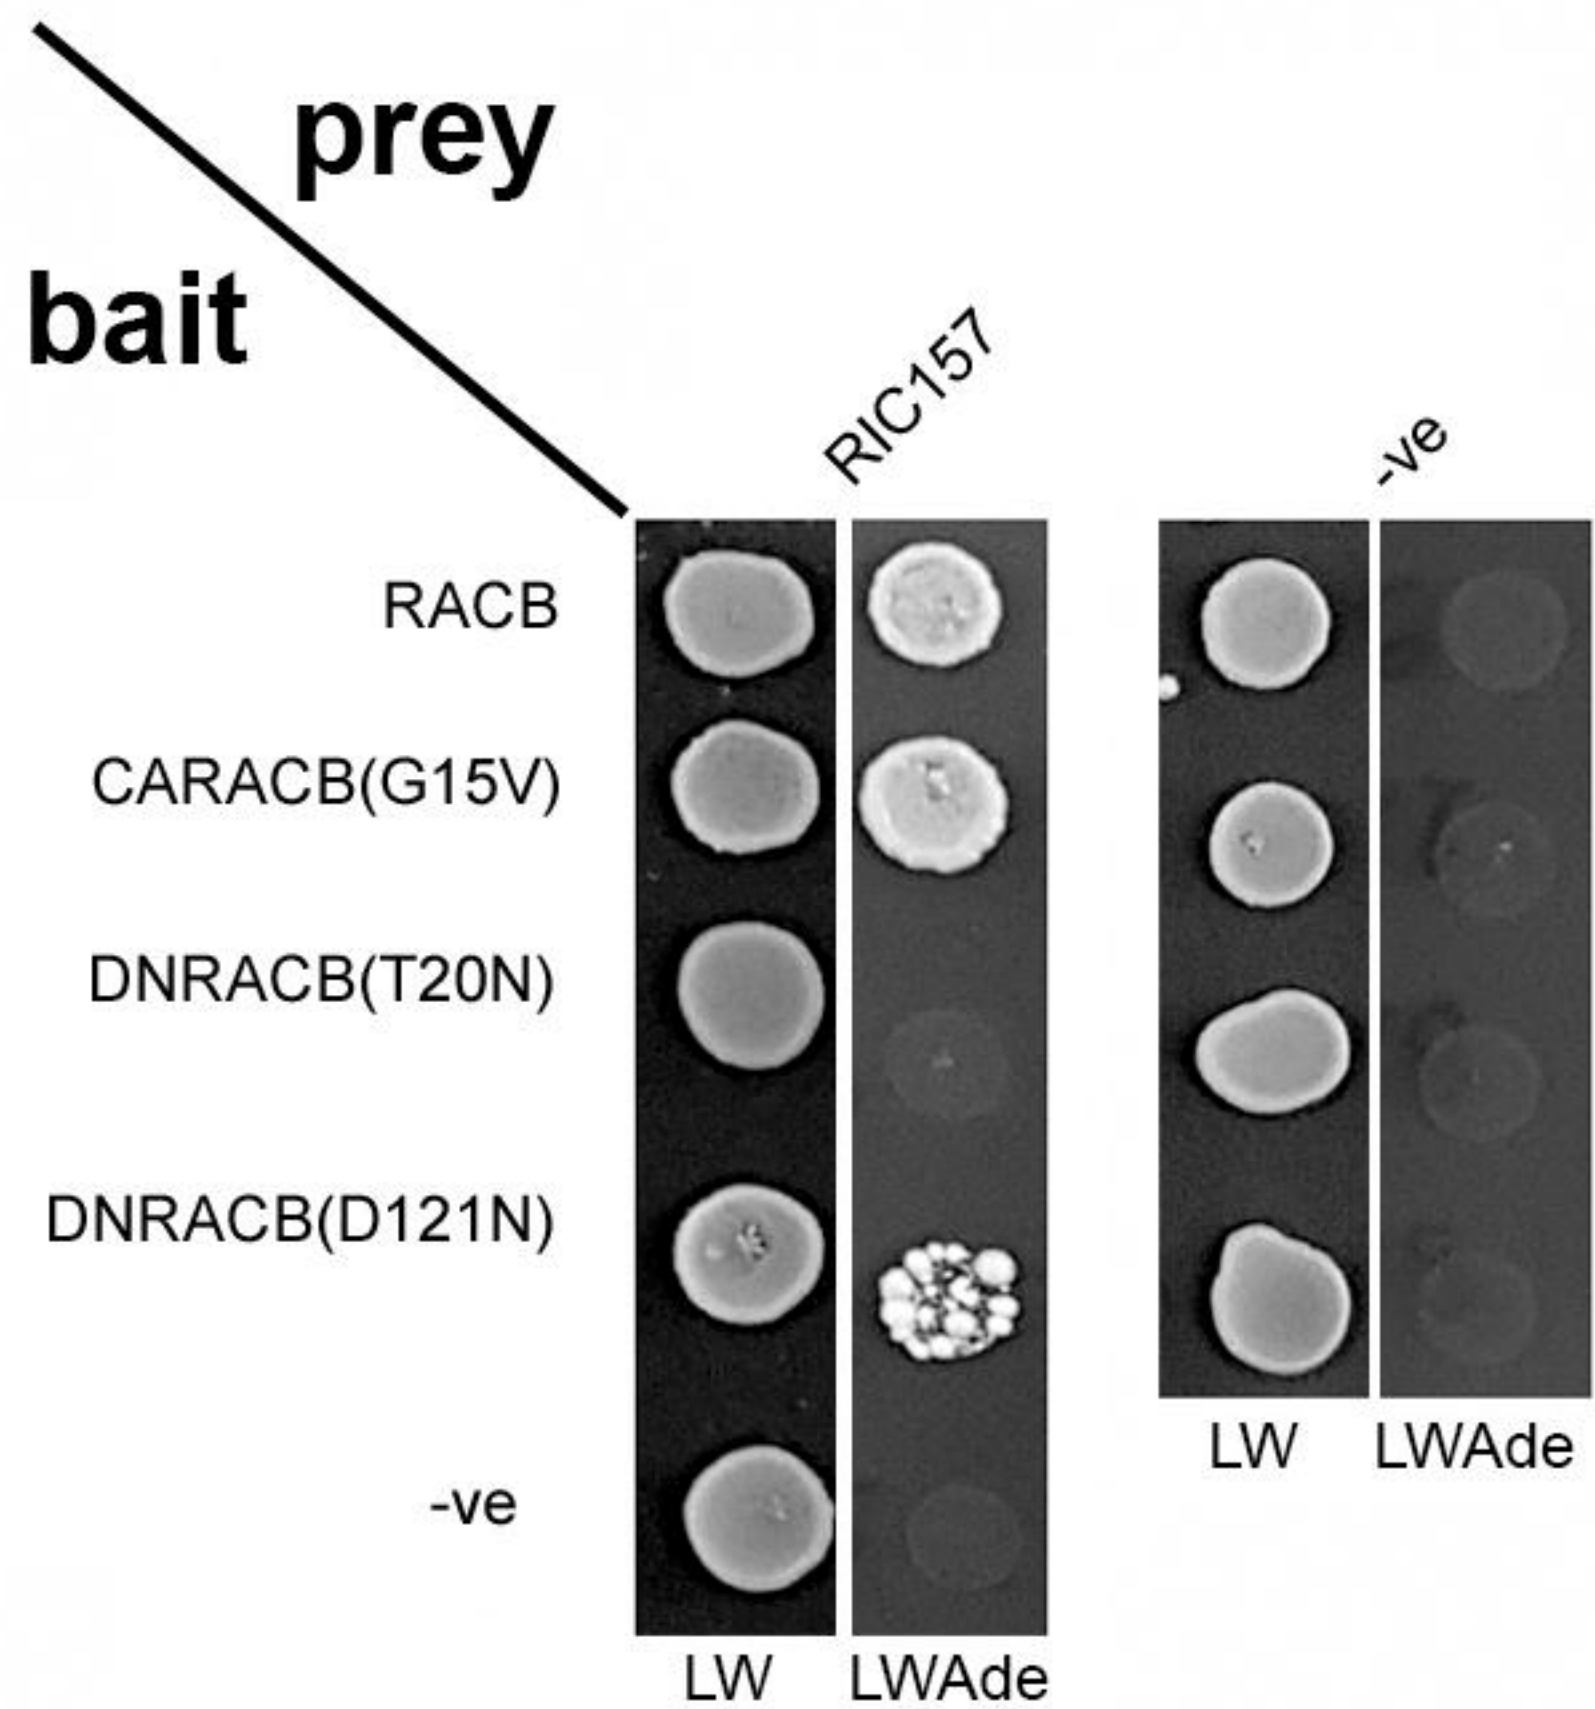**B**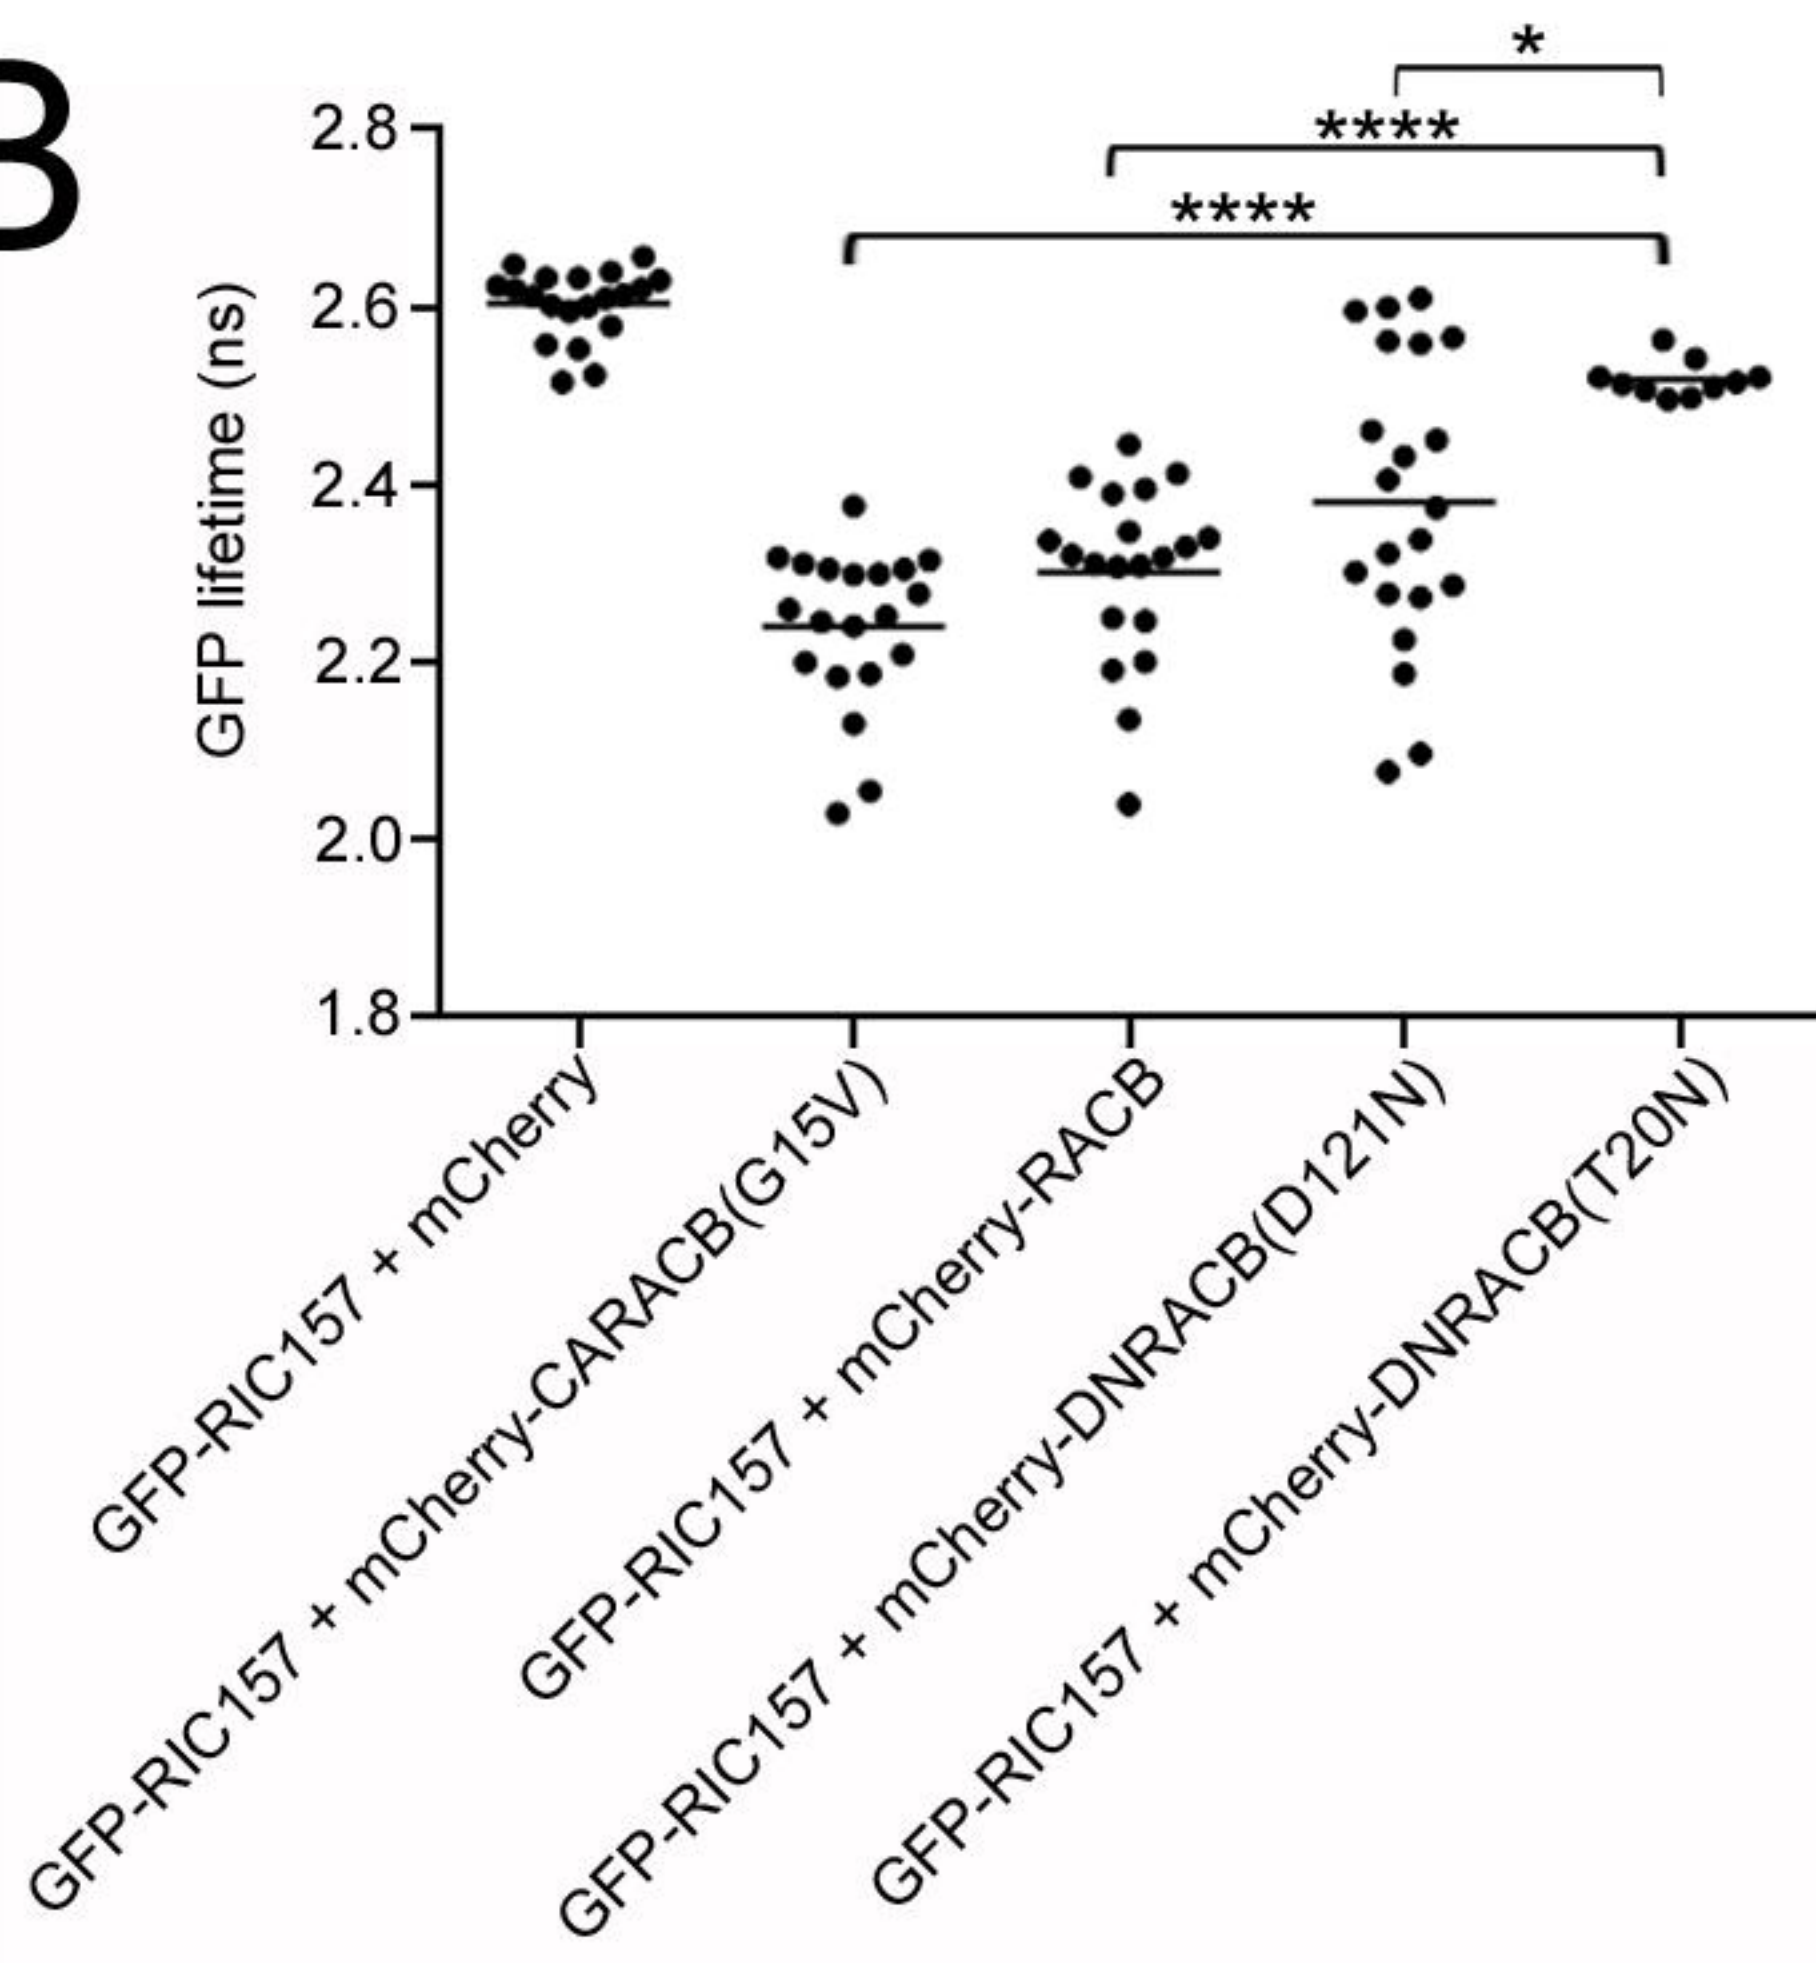

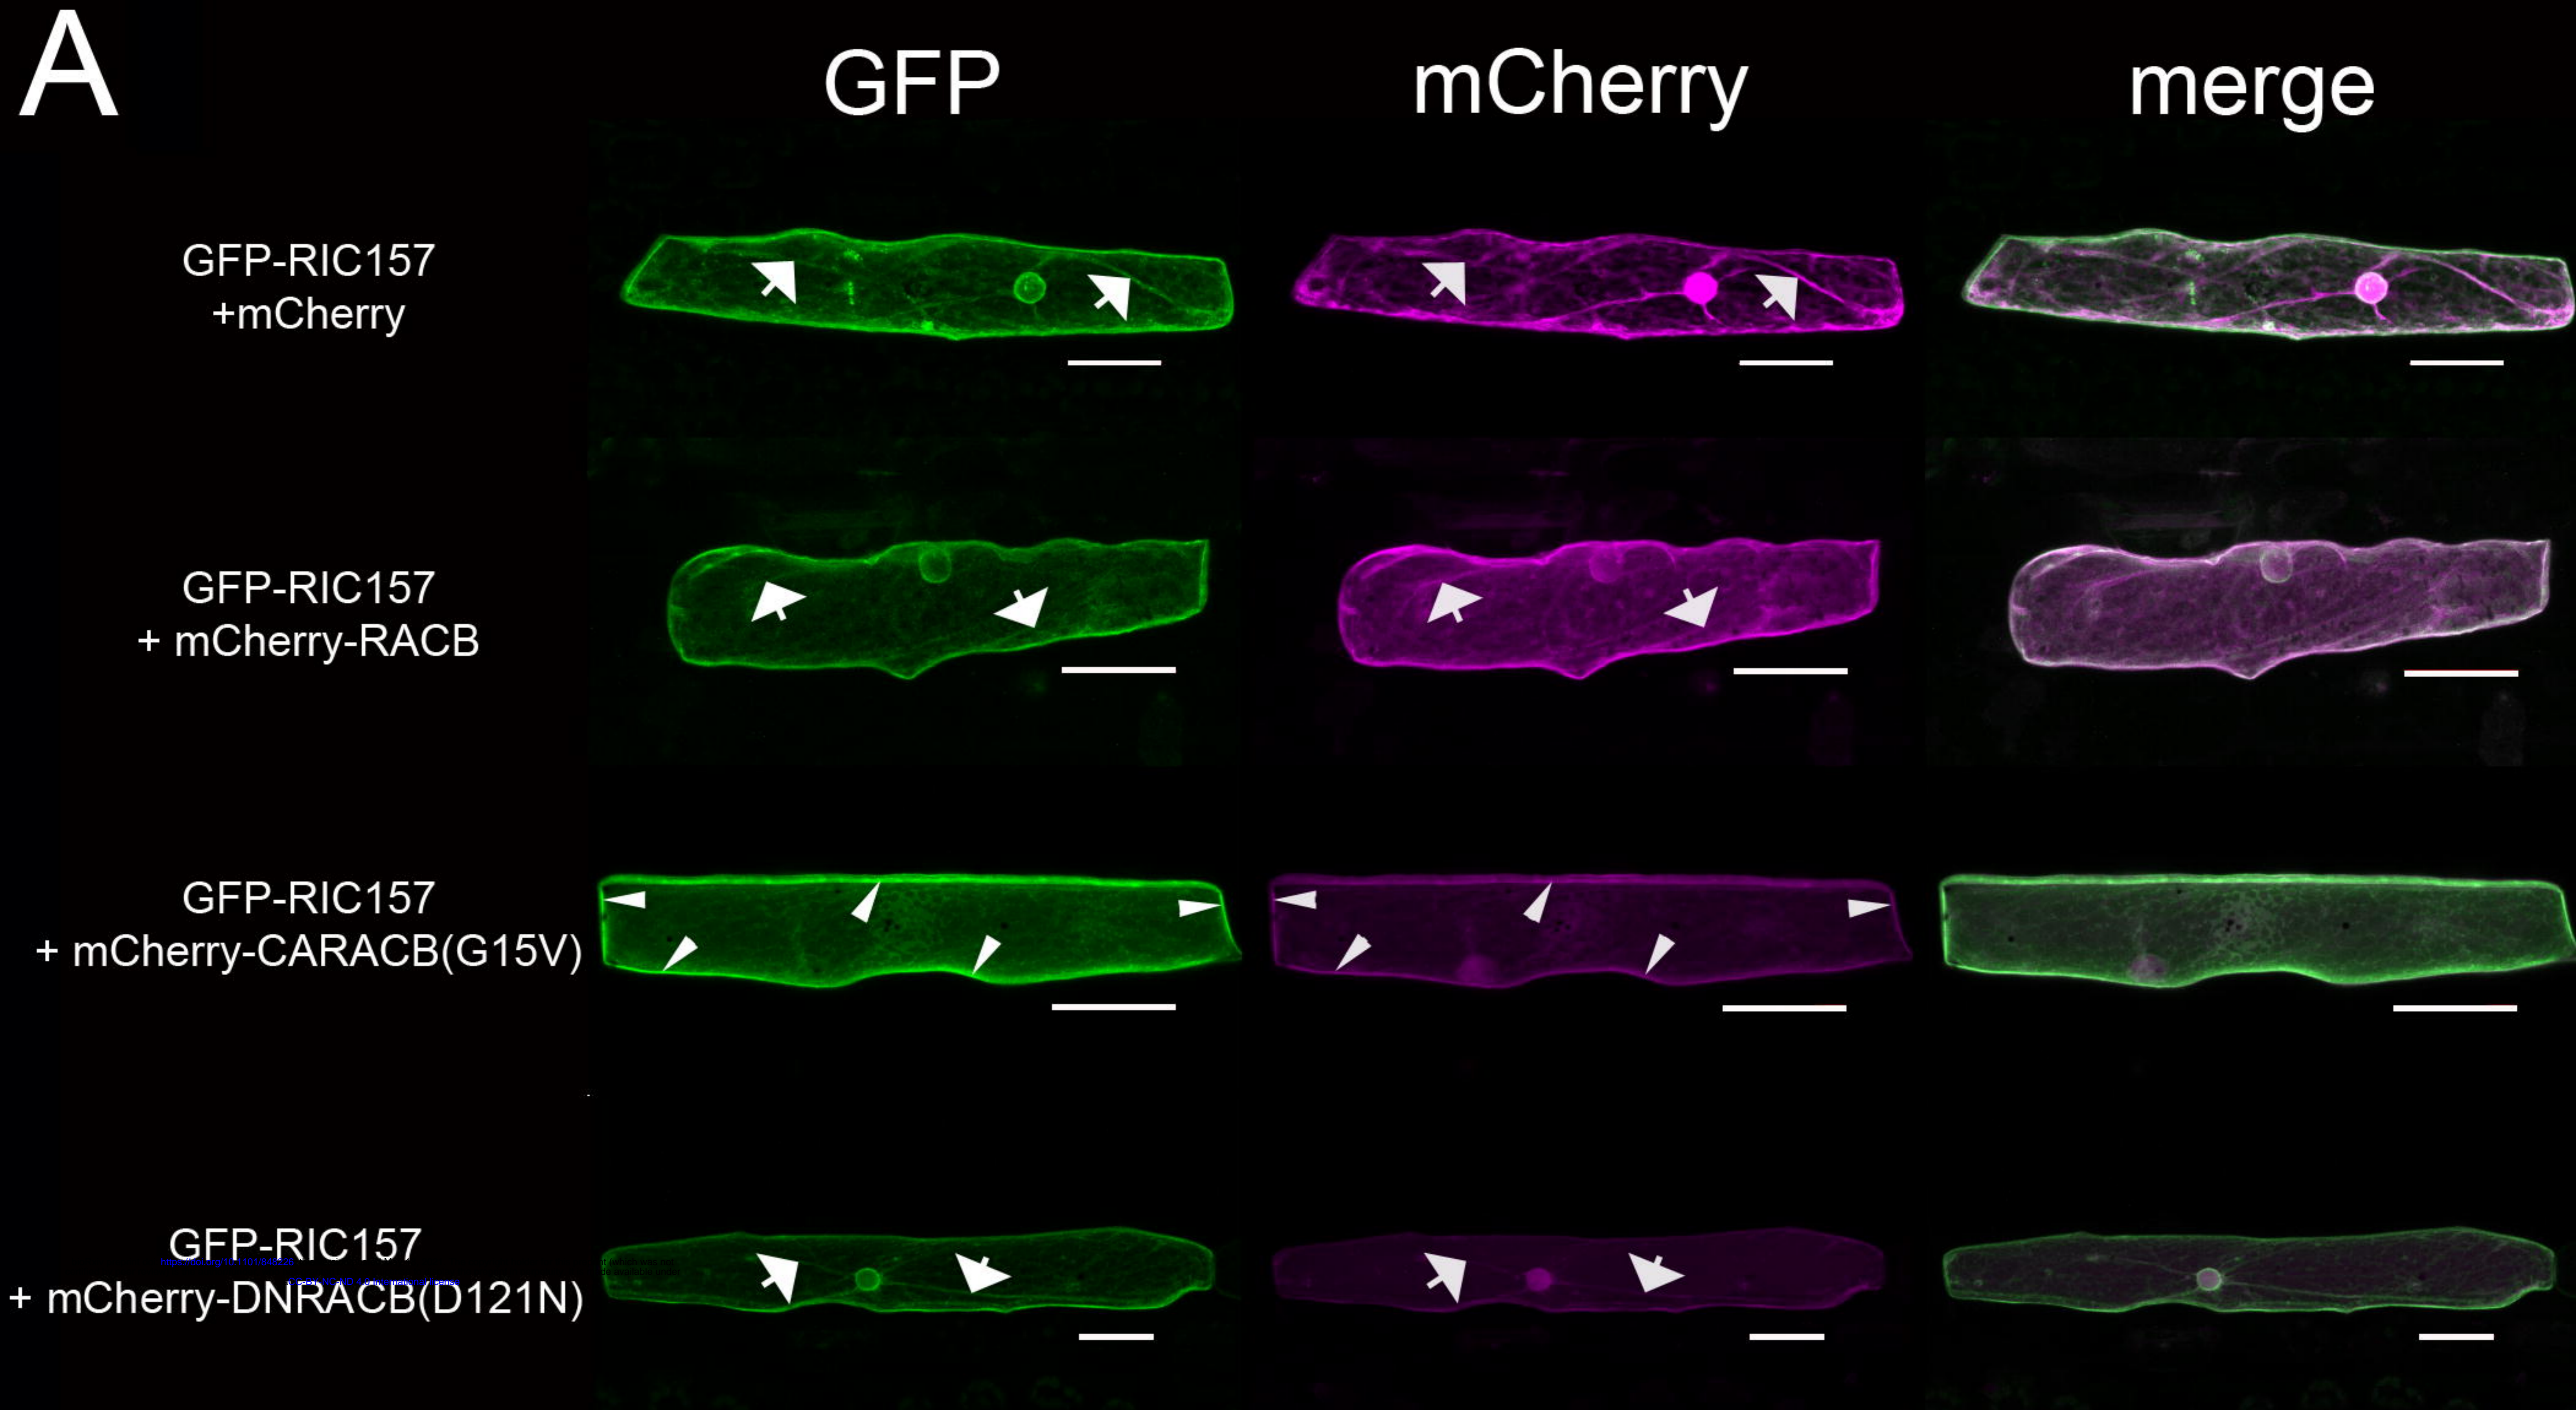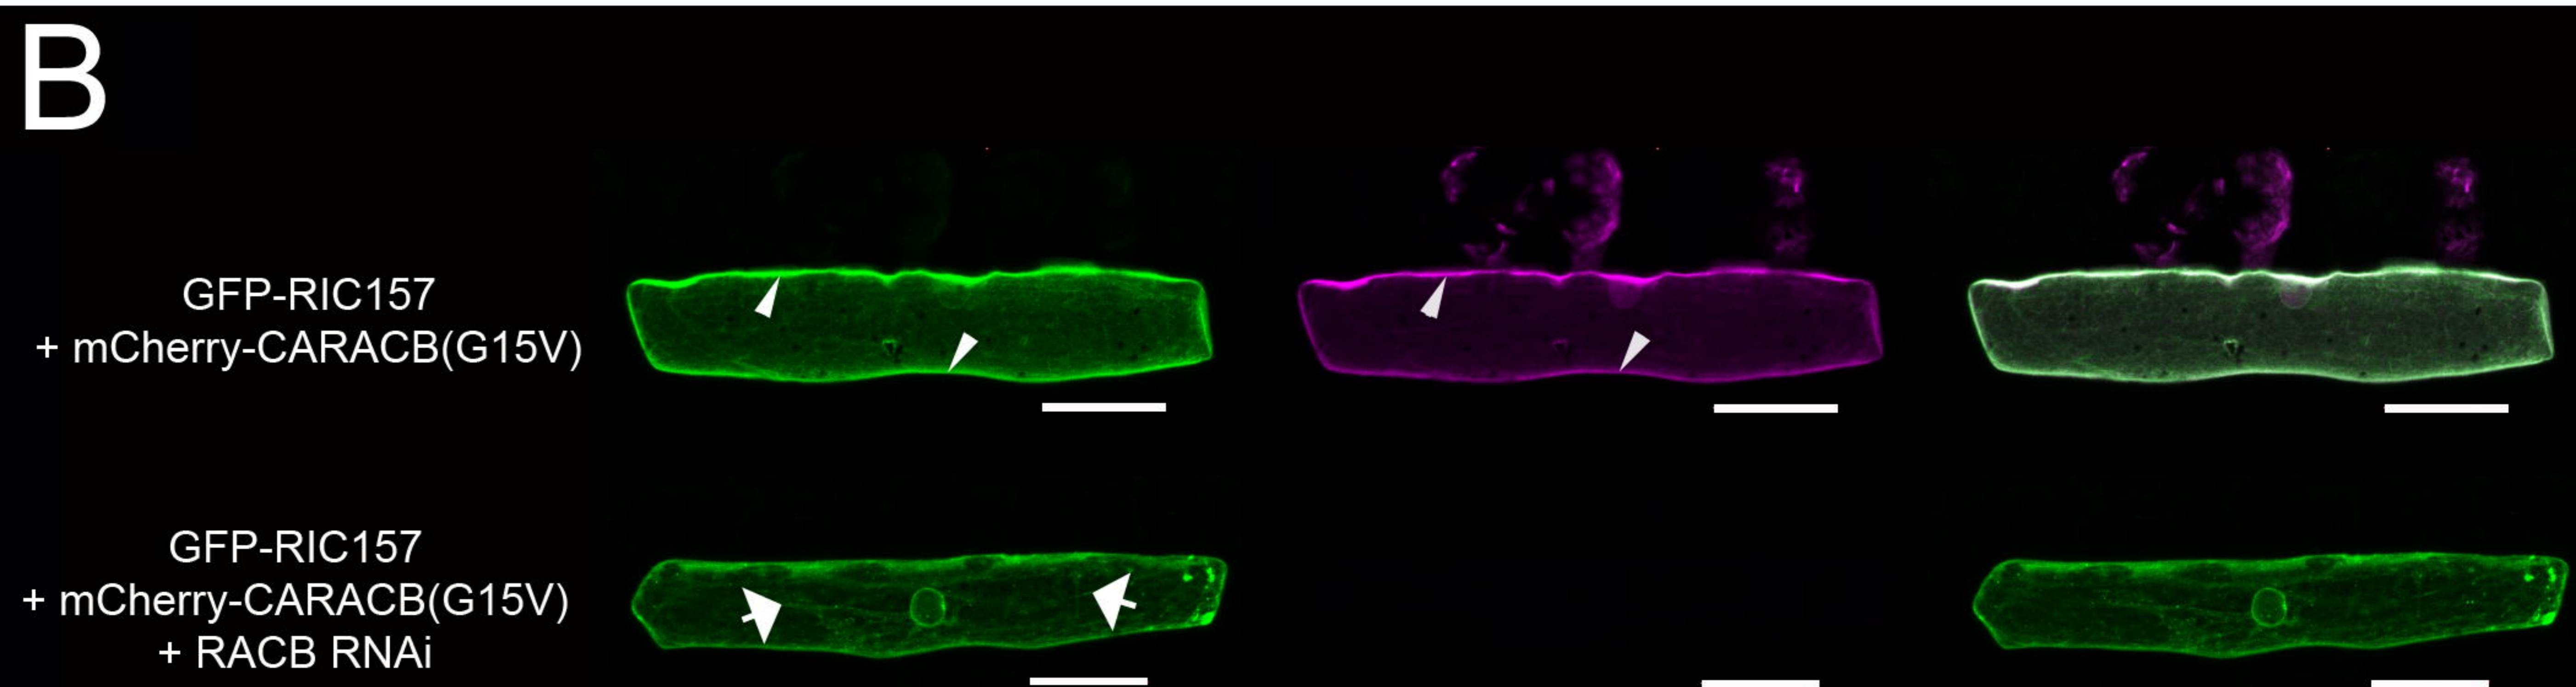

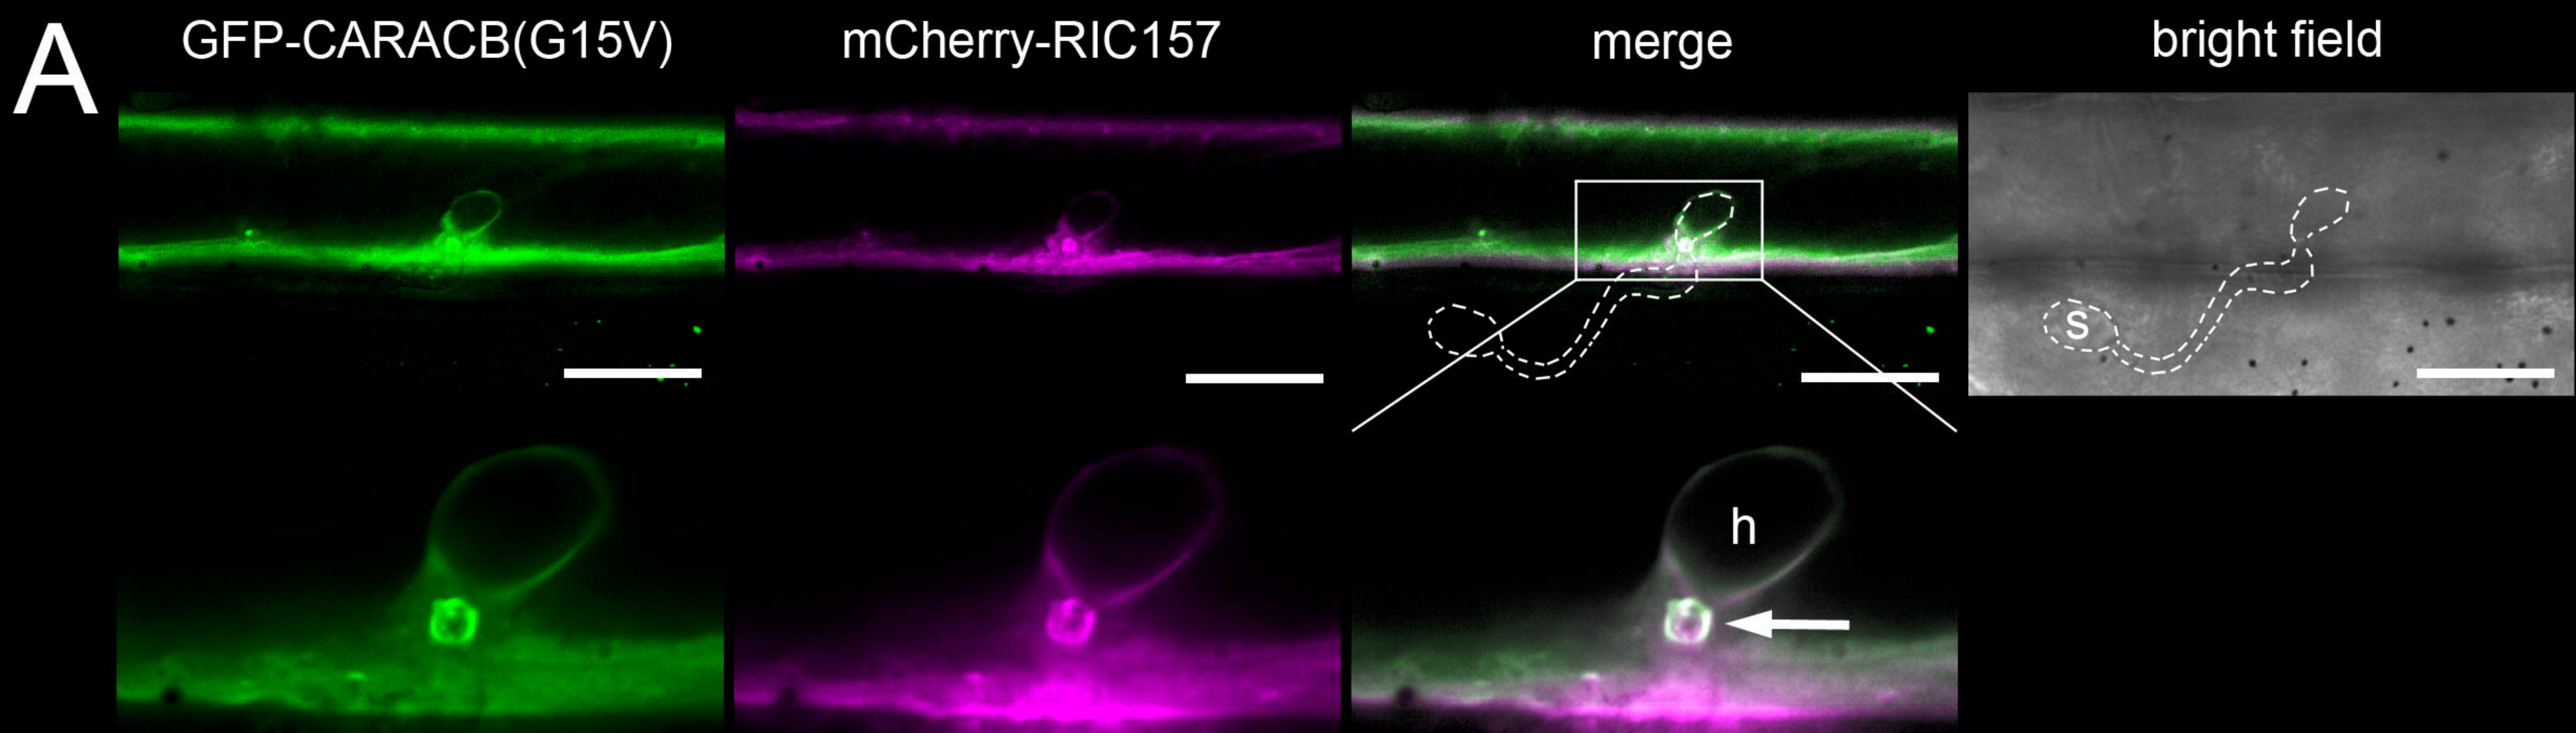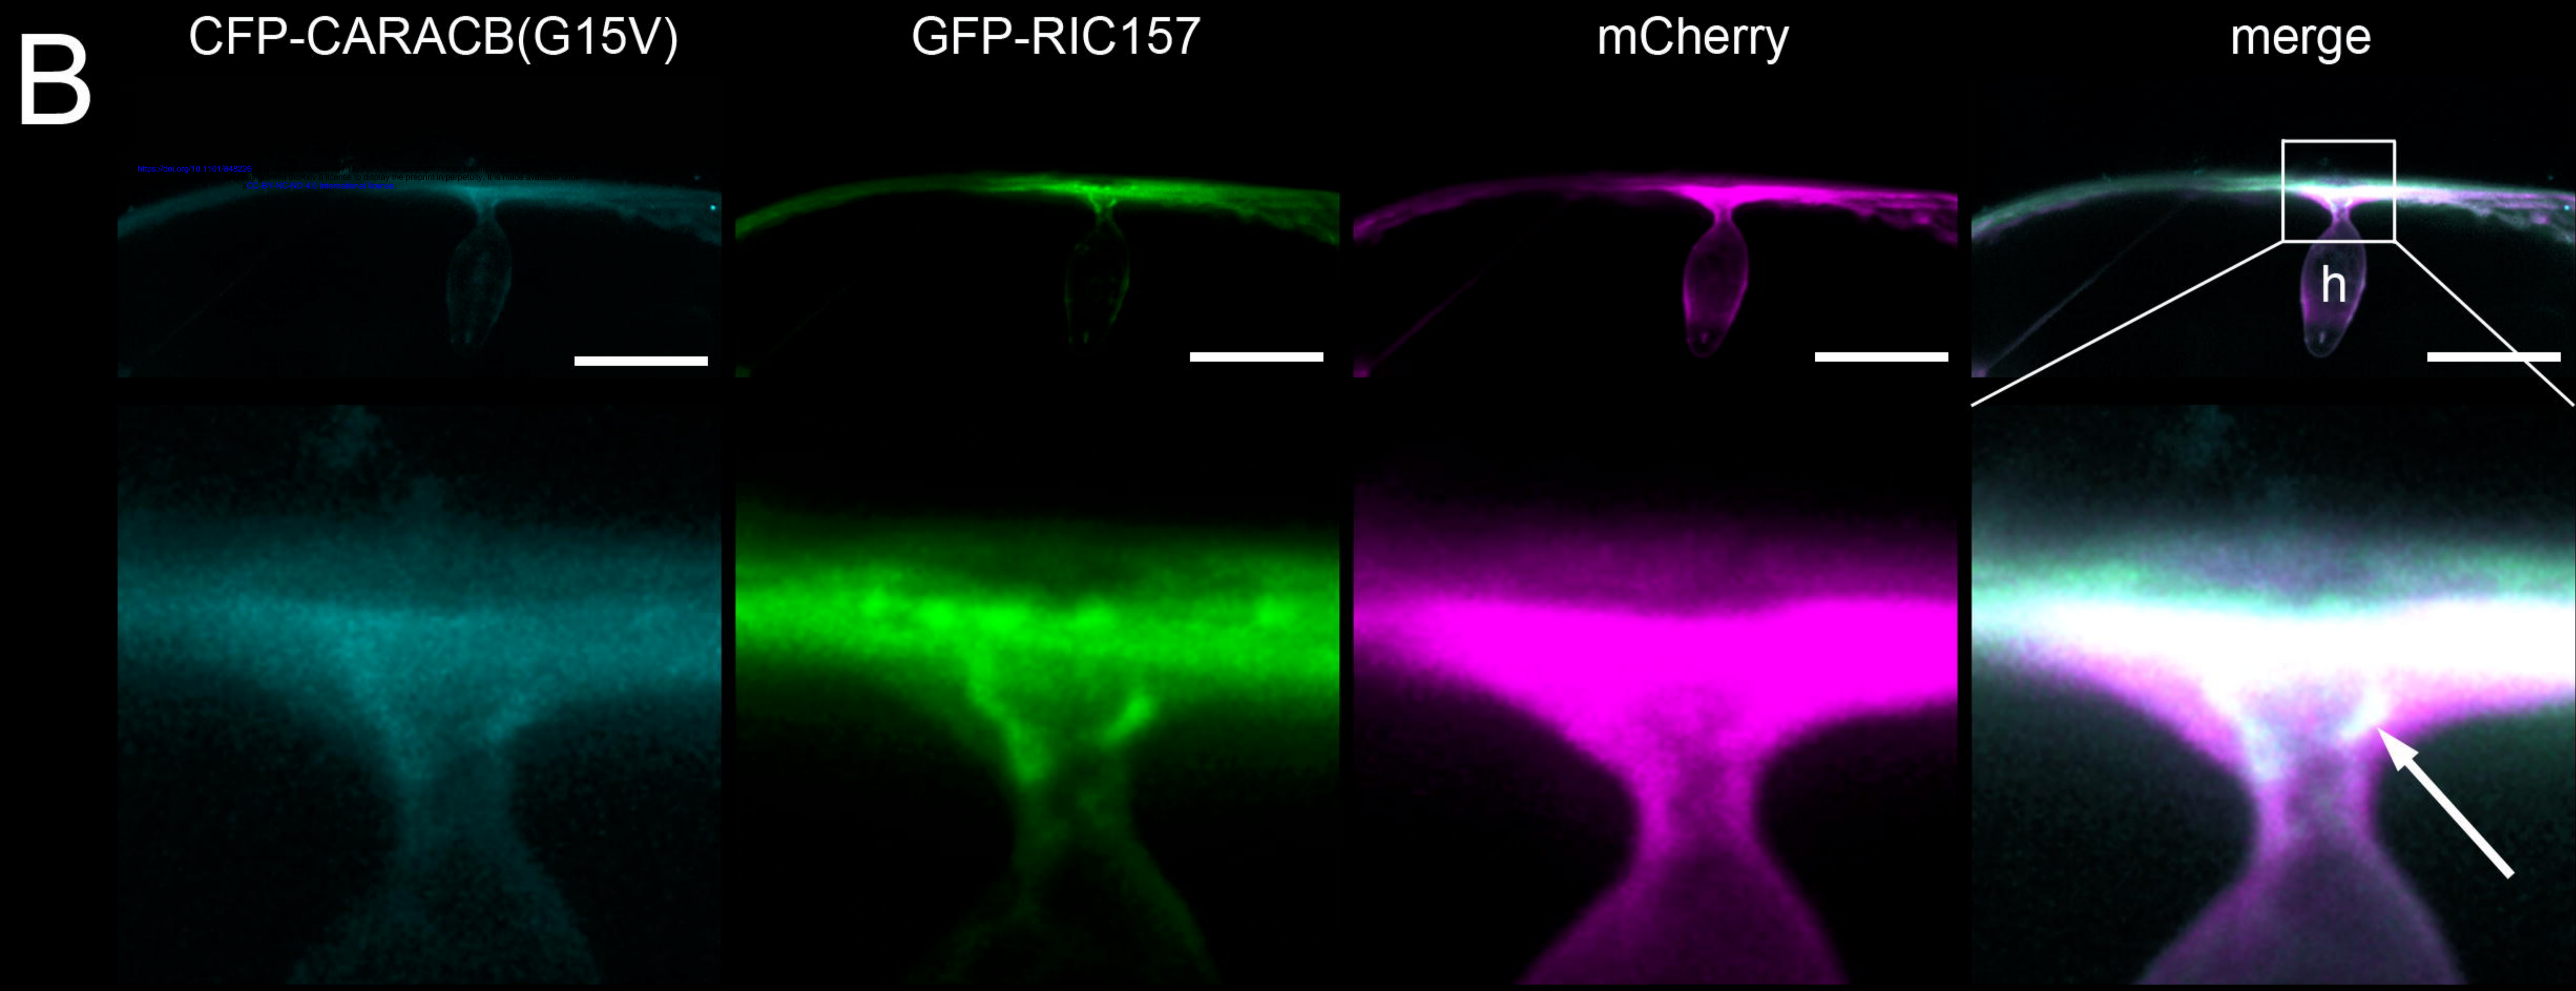

Source: https://www.biorxiv.org/content/10.1101/848226v2.full.pdf
